# Supplementary material for: The relationship between cannabis use and measures of anxiety and depression in a sample of college campus cannabis users and non-users post state legalization in Colorado
Source: PeerJ. 2016 Dec 8;4:e2782. doi: 10.7717/peerj.2782 (PMC5149055; doi:10.7717/peerj.2782)
Supplement: Data S1 [file peerj-04-2782-s001.xlsx]

## Sheet: Personality Inventory
Subject Number	Age	Gender	Gender- Info	Handedness	Native English	Other Language	Caffeine- 8 Hrs	Caffeine- 8 Hrs Info	Caffeine- 24 Hrs	Caffeine- 24 Hrs Info	Alcohol- 8 Hrs	Alcohol- 8 Hrs Info	Alcohol- 24 Hrs	Alcohol- 24 Hrs Info	Tobacco- 8 Hrs	Tobacco- 8 Hrs Info	Tobacco- 24 Hrs	Tobacco- 24 Hrs Info	Cannabis- 8 Hrs	Cannabis- 8 Hrs Info	Cannabis- 24 Hrs	Cannabis- 24 Hrs Info	Other Substance- 8 Hrs	Other Substance- 8 Hrs Info	Other Substance- 24 Hrs	Other Substance- 24 Hrs Info	Depression Medication	Anxiety Medication	Past Vision Problem	Current Vision Problem	Vision Problem Info	Neurological Problem	Neurological Info	Mood Disorder	Mood Disorder Info	Anxiety Disorder	Anxiety Info	Substance-Related	Substance-Related Info	Other Disorder	Other Info	Family Mood Disorder	FMD Info	Family Anxiety Disorder	FAD Info	Family Substance Issue	FSI Info	Family Disorder- Other	FDO Info
116	18	F		R	1		0		0		0		0		1	2 Cigarettes	0		0		0		0		0		0	0	1	1	Astigmatism	0		1	Depression	1	GAD	0		0		1	Depression	1	GAD	1	Alcoholism	0
118	22	M		R	1		0		0		0		1	10 Beers	0		1	5 cigarettes	0		0		0		0		0	0	0	0		0		0		1	GAD	1	Alcoholism	0		0		0		0		1	Borderline personality disorder
119	18	F		R	1		0		0		0		0		0		0		0		0		0		0		0	0	0	0		0		1	Depression	1	Mild anxiety	0		0		1	Depression	1	Mild Anxiety	0		0
121	18	F		R	1		1	16 oz	1	16oz	0		0		0		0		0		0		0		1	Birth control	0	0	1	0	Astigmatism	0		0		0		0		0		0		0		0		0
124	18	M		R	1		1	3 20oz Sodas	1	5 20oz sodas	0		0		0		0		0		0		0		0		0	0	1	0	Corrected vision	0		0		0		0		0		0		0		1	Alcoholism	0
125	18	F		R	1		1	"Once"	1	"Once"	0		0		0		0		0		0		0		0		0	0	0	0		0		0		0		0		0		1	Bipolar/Depression	0		1	Alcoholism/Drug abuse	0
126	18	F		R	1		0		0		0		0		0		0		0		0		0		0		0	0	1	0	Corrected vision	0		0		0		0		0		0		0		0		0
130	18	F		R	1		1	1 cup	1	3 cups	0		0		0		0		0		0		0		0		0	0	0	0		0		0		1	Mild anxiety	0		0		0		0		0		0
131	18	F		L	1		0		0		0		0		0		0		0		0		0		0		0	0	1	1	Nearsighted	0		0		0		0		0		1	Depression	1	Not Specified	0		0
132	19	Other	Female to Male transgender	R	1		1	8oz tea (15mg)	1	45mg	0		0		0		0		0		0		1	Prozac 10mg	1	Lamictal 100mg	1	1	1	0	Corrected vision	0		1	Bipolar II - Currently Depressive	1	Panic disorder	0		0		1	Depression	1	Panic disorder	0		0
133	20	F		R	1		1	Cup of coffee	0		0		0		0		0		0		0		0		0		0	0	0	0		0		1	Depression	1	OCD	0		0		1	Depression	1	OCD	0		0
136	18	M		R	1		0		0		0		0		0		0		0		0		0		0		0	0	0	0		0		0		0		0		0		0		0		0		0
137	19	F		R	1		0		0		0		0		0		0		0		0		0		0		0	0	1	0	Corrected vision	0		0		0		0		0		0		0		0		0
138	18	F		R	1		0		0		0		0		0		0		0		0		0		0		0	0	0	0		0		0		0		0		0		0		0		0		0
139	18	F		R	1		1	2 Sodas	1	3 Sodas + 1 coffee	0		0		0		1	4 Cigarettes	0		1	A gram	0		0		0	0	0	0		0		1	Seasonal Affect Disorder (3 years ago)	0		0		0		0		0		0		0
140	18	F		R	1		1	Glass cherry coke	0		0		0		0		0		0		0		0		0		0	0	1	0	Corrected vision	0		1	Depression	0		0		0		1	Not Specified	0		0		0
141	18	F		L	1		0		0		0		0		0		0		0		0		0		0		0	0	1	0	Corrected vision	0		0		0		0		0		0		1	Not Specified	0		0
142	18	F		L	1		1	Cup of coffee	0		0		0		0		0		0		0		1	Birth Control	0		0	0	0	1	Mild astigmatism	0		0		0		0		0		0		0		0		0
143	19	F		R	0	Russian	0		0		0		0		0		0		0		0		0		0		0	0	0	0		0		0		0		0		0		0		0		0		0
144	19	M		R	1		0		1	Cup of coffee	0		0		0		0		0		0		0		0		0	0	0	0		0		0		0		0		0		0		0		0		0
145	25	M		R	1		1	12oz	1	16oz	0		0		0		0		0		0		0		0		0	0	0	0		0		0		1	PTSD	0		0		0		0		0		0
146	18	F		R	1		1	Half cup	0		0		0		0		0		0		0		0		0		0	0	0	1	Need glasses	0		0		0		0		0		0		0		0		0
147	18	F		R	1		0		0		0		0		0		0		0		0		1	Citalopram (15mg)	0		0	1	0	0		0		0		1	GAD, OCD	0		0		0		1	Not Specified	0		0
148	19	F		R	1		0		0		0		0		0		0		0		0		1	Zoloft	1	Zoloft	0	1	0	0		0		0		1	Not Specified	0		0		0		0		0		0
149	18	F		R	1		1	1 cup	1	3 cups	0		0		0		0		0		0		1	Lamictal (200mg)	1	Lamictal (600mg)	0	0	0	0		0		1	Bipolar I	0		0		0		1	Bipolar	0		0		1	Schizophrenia
150	18	F		L	1		0		0		0		0		0		0		0		0		0		0		0	0	0	0		0		0		1	Not Specified	0		0		1	Not Specified	1	Not Specified	0		0
151	18	M		R	1		1	1 Soda	1	3 Sodas	0		0		0		0		0		0		1	1 Pill Sulfameth (Antibiotic)	1	2 Pills Sulfameth	0	0	0	0		0		0		0		0		0		0		0		0		0
152	18	F		R	1		0		0		0		0		0		0		0		0		0		1	Birth Control	0	0	1	0	Corrected vision	0		0		1	Social Anxiety Disorder	0		0		0		0		0		0
153	18	F		R	1		0		0		0		0		0		0		0		0		1	Vyvanse (60mg), Zoloft (100mg), Armor (5mg), Tirosint (3mg)	0		1	1	0	0		0		1	Depression	1	Anxiety/OCD	0		0		1	Depression	1	OCD/Anxiety	0		0
155	20	M		R	1		0		0		0		0		0		0		0		1	Less than 1/4 gram	0		0		0	0	0	0		0		0		0		0		0		0		0		0		0
156	18	F		R	1		0		0		0		0		0		0		0		0		0		0		0	0	0	0		0		0		0		0		0		0		0		0		0
157	18	F		R	1		1	Latte	0		0		0		0		0		0		0		0		0		0	0	0	1	Nearsighted	0		0		1	Not Specified	0		0		0		0		0		0
158 (Poss)	21	F		R	1		0		0		0		0		0		0		0		0		0		1	Spritec (Oral Contraception), Citalopram 20mg	1	0	0	0		0		1	Depression	0		0		0		0		0		0		1	ADHD
159	20	F		R	1		0		0		0		0		0		0		0		0		0		0		0	0	1	0	Corrected vision	0		0		0		0		1	ADD	0		0		0		1	ADD
161	18	F		R	1		0		1	Espresso shot	0		0		0		0		0		0		0		0		0	0	0	0		0		1	Depression	1	Social Anxiety Disorder	0		0		0		1	Social Anxiety Disorder, GAD	0		0
162	18	F		R	1		1	Cup of tea	0		0		0		0		0		0		1	Less than 1 bowl	0		1	Concerta (ADHD) 72mg	0	0	0	0		0		0		1	PTSD	0		0		0		0		1	Alcoholism	0
163	18	F		R	1		0		0		0		0		0		0		0		1	Not Specified	0		0		0	0	0	0		0		1	Depression	1	GAD	0		0		1	Depression, Bipolar	1	OCD	1	Alcoholism	1	ADD,ADHD
164	18	F		R	1		1	2-3oz	0		0		0		0		0		0		0		0		0		0	0	0	0		0		0		0		0		0		0		1	OCD	0		0
165	19	F		R	1		0		0		0		0		0		0		0		0		0		0		0	0	0	0		0		0		0		0		0		0		0		0		0
167	29	M		R	1		1	80mg	1	260mg	0		0		0		0		0		0		0		0		0	0	0	0		0		0		0		0		0		1	Not Specified	1	Not Specified	0		0
168	19	M		L	1		1	~80mg	0		0		0		0		0		0		0		1	Adderal 25 mg	0		0	0	1	0	Corrected vision from 20:50	0		1	Dysthymia?	1	Social Anxiety Disorder	0		1	ADHD- inattentive	0		0		0		0
169	18	F		R	1		1	4 Cups	0		0		0		1	"one"	0		0		0		1	Birth Control, Wellbutrin	1	Birth Control, Wellbutrin	1	0	0	0		0		1	Not specified	1	PTSD	0		0		1	Not Specified	1	Not Specified	0		0
170	18	F		R	1		0		1	16oz coffee last night	0		0		0		0		0		0		0		0		0	0	0	0		0		0		0		0		1	Impulse Control Disorder	0		0		0		0
171	18	F		R	1		0		1	Red Bull	0		0		1	2 Cigarettes	0		0		0		0		1	Levermitalan(?) 1000mg	?	?	1	0	Now wears glasses	0		1	Depression	1	Not Specified	0		1	Insomnia	0		0		0		0
172	19	F		R	1		1	Espresso shot	1	2 Espresso shots	0		0		0		0		0		0		0		0		0	0	0	0		0		1	Minor depression	1	Minor anxiety	0		0		1	Depression	1	Anxiety	0		0
173	18	F		R	1		1	>2 oz	0		0		0		0		0		0		0		0		0		0	0	0	0		0		1	Depression	0		0		0		0		0		0		0
174	20	M		L	1		0		0		0		0		0		0		0		0		1	Insulin	0		0	0	0	0		0		0		0		0		0		0		0		0		0
175	18	F		R	1		0		1	1 Monster Energy Drink	0		0		1	2 Cigarettes	0		0		0		0		0		0	0	0	0		0		0		1	PTSD	0		0		0		0		0		0
176	32	F		R	1		1	1/2 Cup coffee	1	3 1/2 Cups coffee	0		0		0		0		0		0		0		1	Cytomel (25mcg) Synthroid (75mcg)	0	0	0	1	Astigmatism	1	TBI	0		1	PTSD	0		0		0		0		0		0
177	19	F		R	1		1	90mg	1	"idk"	0		1	2 Drinks	0		0		0		0		1	Concerta, Abilify, Lamitcal, Trazedone	1	Concerta, Abilify, Lamitcal, Trazedone	1	0	0	0		0		1	Depression	1	Past Diagnosis, Not Specified	1	Past Diagnosis, Not Specified	0		0		1	Not Specified	1	Not Specified	0
178	26	M		R	1		1	Less than 114mg	0		0		0		0		0		0		1	80mg	0		0		0	0	1	0	Corrected vision	0		0		0		0		0		0		0		0		0
179	19	F		R	1		1	20oz	0		0		0		0		0		0		0		0		0		0	0	0	0		0		1	Depression	0		0		0		0		0		0		0
180	25	M		R	1		0		0		0		1	Glass of wine	0		0		0		0		0		0		0	0	0	0		0		0		0		0		0		0		0		0		0
181	18	F		R	1		1	Cup of coffee	0		0		0		0		0		0		0		1	Lexaprot (Birth Control)	1	Lexaprot (Birth Control)	0	0	0	0		0		1	Depression	1	Anxiety	0		0		1	Depression	1	Anxiety	0		0
182	19	Other	Female to Male transgender	R	1		0		0		0		0		1	5 Cigarettes	1	10 Cigarettes	0		0		1	Zoloft	1	Zoloft	1	0	0	0		0		1	Depression	1	Not Specified	0		0		0		0		0		0
184	18	M		R	1		0		0		0		1	5 Beers	0		0		0		1	1 Joint	0		0		0	0	0	0		0		0		0		0		0		0		0		0		1	Autism
185	18	F		R	0	Spanish	0		0		0		0		0		0		0		0		0		0		0	0	1	0	Corrected vision	0		0		0		0		0		0		0		0		0
186	18	M		R	1		0		1	1 Soda	0		0		0		0		0		0		0		0		0	0	0	0		0		0		0		0		0		0		0		0		0
187	19	M		R	1		0		1	8oz glass of pre-workout	0		0		0		0		0		1	Small amount of concentrate (wax)	0		0		0	0	0	0		0		0		0		0		0		0		0		1	Alcoholism	0
188	18	F		R	1		1	1 Can of soda	1	2 Cans of soda	0		0		0		0		0		0		0		0		0	0	1	0	Corrected vision	0		0		0		0		0		1	Depression	0		0		0
189	19	F		R	1		1	1 'Cup'	0		0		0		0		0		0		0		0		0		0	0	1	0	Corrected vision	0		1	Depression	0		0		0		1	Bipolar/Depression	0		1	Alcoholism/Drug abuse	1	Schizophrenia
190	18	M		R	1		0		0		0		0		0		0		0		1	1/8th + 35mg	0		0		?	?	0	1		0		0		0		0		0		1	Depression	0		1	Alcoholism	0
191	18	M		R	1		1	16-19g	1	19, 21g	0		0		1	3mg	1	4mg	0		0		0		0		?	?	0	0		0		0		0		0		0		0		0		0		0
192	19	F		L	1		0		0		0		0		0		0		0		0		0		0		?	?	1	0	Contacts, cupping of optic disc	0		0		0		0		0		0		0		0		0
194	19	F		R	1	SPANISH	0		0		0		0		0		0		0		0		1	25 MG CELEXA AND 25MG BENADRYL	1	25 MG CELEXA AND 25MG BENADRYL	?	?	0	1	CONTACTS	1	not specified	1	DEPRESSION	1	gad	0		0		0		0		0		0
195	18	F		R	1		0		0		0		0		0		0		0		0		0		1	MELATONIN 5 MG	?	?	0	0		0		0		0		0		0		0		1	MOTHER	0		0
196	18	M		R	1		0		0		0		0		0		0		0		0		0		0		?	?	0	0		0		0		0		0		0		0		0		0		0
197	18	F		R	1		0		1	2 cups coffee	0		0		0		0		0		0		0		0		?	?	0	0		0		0		0		0		0		0		0		0		0
198	19	F		R	1		0		0		0		0		0		0		0		0		0		0		?	?	0	0		0		0		0		0		0		0		0		0		0
199	18	F		R	1		0		0		0		0		0		0		0		0		0		0		?	?	0	0		0		0		0		0		0		0		0		0		0
200	18	F		R	0	CHINESE	1	1 COFFEE	1	COFFEE, RED BULL	0		0		0		0		0		0		0		0		?	?	0	0		0		1	DEPRESSION	1	Not Specified	0		0		0		0		0		0
201	18	M		R	1		1	100 MG	0		0		0		0		0		0		0		0		0		?	?	0	0		0		1	Depression	0		0		0		1	Depression, Bipolar	0		1	ALCOHOLIC	0
202	18	M		L	1		0		0		0		0		0		0		0		0		0		0		?	?	0	1	Nearsighted	0		0		0		0		0		0		0		0		0
203	21	M		A	1		1	A LOT	1	A LOT	0		1	3 BEERS	1	ONE CIGARETTE	1	2 CIGARETTES	1	ONE BOWL	1	2 BOWLS	1	200 MG LAMICIAL (ANTIDEPRESSANT)	1	400 MG LAMICIAL (ANTIDEPRESSANT)	?	?	0	0		0		1	Depression	1	SLIGHT ADHD	0		0		1	DEPRESSION	1	Not Specified	0		0
204	19	F		L	1		0		0		0		0		0		0		0		0		0		0		?	?	0	0		0		0		0		0		0		0		0		0		0
205	18	F		R	1		1	8 OZ	1	8 OZ	0		0		0		0		0		0		0		0		?	?	0	0		0		0		1	TEST ANXIETY	0		0		1	BIPOLAR	0		1	ALCOHOLIC	0
206	18	M		R	1		0		0		0		0		0		0		0		0		0		0		?	?	0	0		0		0		0		0		0		0		0		1	ALCOHOL	0
207	20	F		R	1		1	2 CUPS	1	4 CUPS	0		0		0		0		0		0		0		0		?	?	0	1	CORRECTED VISION	0		0		1	ANXIETY	0		0		1	MOOD DISORDER SISTER	1	ANXIETY DAD	0		0
208	19	F		R	1		1	1 CUP OF COFFEE	1	1 CUP OF COFFEE	0		0		0		0		0		0		0		0		?	?	0	0		0		0		0		0		0		0		0		0		0
209	18	F		R	1		1	1 CUP OF COFFEE	1	3 SHOTS OF ESPRESSO	0		0		0		0		0		0		0		1	ZOLOFT, VIVANCE, ADDEROL	?	?	0	1	CONTACTS	0		0		1	Not Specified	0		0		0		0		0		0
209A	19	F		R	1		0		0		0		0		0		0		0		0		1	30 MG CITALOPRAM	0		?	?	0	0		0		1	DEPRESSION	0		0		0		1	DEPRESSION	0		0
210	18	M		R	1		1	16 OZ ENRG	1	16OZ ENRG	0		0		0		0		0		0		0		0		?	?	0	0		0		1	DEPRESSION	0		0		0		0		0		0		0
211	18	M		R	1		1	1 CUP	1	1 RED BULL 1 ESPRESSO	0		1	8 STANDARD DRINKS	0		1	1 CIGARETTE	0		1	1 HIT OF MARIJUANA	0		0		?	?	0	0		0		0		0		0		0		0		0		0		0
212	18	F		R	1		1	3 SODAS	1	7 SODAS	0		0		1	4 CIGARETTES	1	9 CIGARETTES	0		0		0		0		?	?	0	0		0		1	DEPRESSION	1	ANXIETY	0		0		0		0		1	ADDICTION TO PRESCRIPTION DRUGS	0
213	21	M		R	1		1	1 ESPRESSO	1	1 ESPRESSO	0		0		0		0		1	COUPLE DABS	1	5 DABS	0		0		?	?	1	1	HAVE GLASSES	0		0		0		0		0		0		0		0		0
214	18	F		R	1		0		0		0		0		0		0		0		0		0		0		?	?	0	0		0		0		0		0		0		0		0		0		0
215	18	M		R	1		0		1	1 MOUNTAIN DEW	0		0		0		0		0		0		0		0		?	?	0	0		0		0		0		0		0		0		0		0		0
215A	19	F		R	1		0		0		0		0		0		0		0		1	1 JOINT	0		0		?	?	0	1	Nearsighted	0		0		0		0		0		0		1	Not Specified	1	ALCOHOLISM	0
216	17	F		R	1		1	1 CUP OF COFFEE	1	1 CUP OF COFFEE	0		0		0		0		0		0		0		0		?	?	0	1	Nearsighted	0		0		1	INFORMED BY THERAPIST	0		1	INFORMAL DEPRESSIVE ADD BY THERAPIST	0		0		0		0
217	19	F		L	1		0		0		0		0		0		0		0		0		0		0		?	?	0	0		0		0		1	Not Specified	0		0		0		1	Not Specified	0		0
218	18	Other	TRANSGENDERED	A	1	SPANISH	0		0		0		0		0		0		0		0		0		0		?	?	0	1	LEGALLY BLIND WITHOUT CORRECTION (CONTACTS)	0		1	Depression	1	ANXIETY DEPRESSION	0		0		0		0		0		0
219	18	F		R	1		0		0		0		0		0		0		0		0		1	ADDERAL 20 MG PRESCRIBED	0		?	?	0	1	VISION CORRECTED WITH CONTACT LENSES	0		0		1	Mild anxiety	0		0		1	BIPOLAR GRANDFATHER	0		0		0
220	19	M		R	1		0		0		0		0		0		0		0		0		0		0		?	?	0	0		0		0		0		0		0		0		0		0		0
221	19	M		R	1		0		0		0		0		0		0		0		0		0		0		?	?	0	0		0		0		0		0		0		0		0		0		0
222	26	M		L	1		0		0		0		0		1	6 CIGARETTES	1	17 CIGARETTES	0		0		1	NEXIUM 1 DOSE	1	NEXIUM 1 DOSE	?	?	0	0		0		0		0		0		0		0		0		0		0
223	18	F		R	1		1	1 CUP	0		0		0		0		0		0		0		0		0		?	?	0	1	SLIGHT STIGMA TO SEE CLEARLY FOR DISTANCE	1	SLIGHT DYSNOMIA	0		0		0		0		0		0		0		0
224	25	M		R	0	PORTUGUESE/FRENCH	1	300 MG	1	600 MG	0		0		1	1 CIGARETTE	1	1 CIGARETTE	0		0		0		0		?	?	0	1	MYOPIA	0		0		0		0		0		0		0		0		0
225	18	F		R	1		0		0		0		0		0		0		0		0		0		0		?	?	0	0		0		0		0		0		0		0		1	Not Specified	1	ALCOHOL, PRESCRIPTION MEDICINE	0
226	19	F		R	1		1	12 OZ	0		0		0		0		0		0		0		0		0		?	?	0	0		1	MIGRAINES	0		0		0		0		0		0		0		0
227	19	M		R	1		0		0		0		0		0		0		0		0		0		0		?	?	0	1	USE CONTACTS	0		0		0		0		0		1	DEPRESSION	0		0		0
228	18	F		R	1		1	CUP	0		0		1	3 DRINKS	0		0		0		0		0		0		?	?	0	0		0		0		0		0		0		0		0		0		0
229	18	F		R	1		0		0		0		0		0		0		0		0		1	EMERGENCY-C 2 PACKETS	0		?	?	0	0		0		0		0	TEST ANXIETY	0		0		0		0		0		0
230	20	M		A	1		1	100 MG	1	100 MG	0		0		1	2 TIMES	0		0		1	1 TIME	0		0		?	?	0	0		0		0		0		0		0		1	DEPRESSION, MOM	0		0		0
231	19	F		R	1		1	2 CUPS	1	1 CUP	0		0		0		0		0		0		0		0		?	?	0	0		0		1	Depression	1	Social Anxiety Disorder	0		0		1	DEPRESSION	0		0		0
232	18	F		R	1		0		0		0		0		0		0		0		0		1	1 TABLET MULTIVITAMIN	0		?	?	0	1	CONTACTS	0		0		0		0		0		1	BIPOLAR	0		1	NOT SPECIFIED	0
233	18	M		R	1		0		0		0		0		0		0		0		0		1	50 MG FOCALIN XR (SIMILAR TO ADDEROL)	0		?	?	0	1	WEAR VERY LOW POWER GLASSES SOMETIMES	0		0		0		0		1	MINUTE ADD	1	DAD HAS SLIGHT DEPRESSION	0		0		0
234	19	F		R	1		1	2 CUPS	1	3 CUPS	0		0		0		0		0		0		0		0		?	?	0	1	Astigmatism	0		0		0		0		0		0		0		0		0
235	22	M		R	1		1	8 OZ-12OZ	0		0		0		0		0		0		1	20 MG	0		0		?	?	1	1	Nearsighted	0		1	Depression	1	ANXIETY	0		0		0		1	MOM	0		0
236	19	F		R	1		0		0		0		0		0		0		0		0		0		0		?	?	0	0		0		0		0		0		0		0		0		0		0
237	18	F		R	1		0		1	1 LARGE COFFEE	0		0		1	1 CIGARETTE	1	6-8 CIGARETTES	0		0		0		1	CYMBALTA, SYNTHROID, BUSPAR, TRAZADONE	?	?	0	0		0		1	MAJOR DEPRESSIVE DISORDER	1	ANXIETY, PANIC ATTACKS	1	PERCOCET ADDICTION	1	Insomnia	1	BIPOLAR, DEPRESSION, ADD, ADHD	1	SEVERE ANXIETY	1	LOTS OF ALCOHOLISM	0
238	19	F		R	0	SPANISH	1	1 CUP OF COFFEE	0		0		0		0		0		0		0		0		0		?	?	0	0		0		0		0		0		0		0		0		0		0
239	18	F		R	1		0		0		0		0		0		0		0		0		0		0		?	?	0	0		0		0		0		0		0		0		0		0		0
240	19	F		R	1		1	4 CUPS	1	2 CUPS	0		0		0		0		1	NOT SPECIFIED	1	Not Specified	0		0		?	?	0	0		0		1	Not specified	1	Not Specified	0		0		1	PARENTS WITH DEPRESSION	0		0		0
241	19	F		R	1		0		0		0		0		0		0		0		0		0		0		?	?	0	1	I HAVE SLIGHT TROUBLE SEEING FAR DISTANCES	0		0		0		0		0		0		0		0		0
242	19	M		R	1		1	2 SHOTS ESPRESSO	0		0		0		1	1 CHEWING TOBACCO	0		0		1	SOME	0		0		?	?	0	0		0		0		0		0		0		0		0		0		0
243	18	Other	AGENDER	R	1		0		1	A FEW SIPS	0		1	A FEW SIPS	0		0		0		0		0		0		?	?	0	1	WEAR CORRECTIVE LENSES	0		1	Minor depression	1	GENERAL ANXIETY DISORDER	0		0		1	CLINICAL DEPRESSION	0	PTSD, GENERAL ANXIETY	0		0
244	20	M		R	1		0		0		0		0		0		0		0		0		0		0		?	?	0	0		0		0		0		0		0		0		0		0		0
245	18	F		R	1		1	12 OZ	1	16 OZ	0		0		0		0		0		1	1 G	0		0		?	?	0	0		0		1	Depression	0		0		0		1	MOTHER, SISTER WITH DEPRESSION	0		1	FATHER ALCOHOLIC	0
246	18	F		R	1		0		0		0		0		0		0		0		0		0		0		?	?	1	0	CONTACT LENSES	0		0		1	TEST ANXIETY	0		0		1	BIPOLAR	0		0		0
247	19	F		R	1		0		0		0		0		1	2 Cigarettes	1	5 cigarettes	1	2 BOWLS	0	10 BOWLS	1	1 PILL XANAX	1	1 PILL XANAX	?	?	1	1	Nearsighted	0		0		1	ANXIETY ATTACKS	0		0		1	BIPOLAR	0		1	ALCOHOLISM, PILL ABUSE	0
249	18	M		R	1		0		0		0		0		0		0		0		0		0		0		?	?	0	0		0		0		0		0		0		0		0		0		0
250	22	M		R	1		1	1 CUP COFFEE	0		0		0		1	2 Cigarettes	0		0		0		0		0		?	?	0	1	WEAR CONTACTS	0		0		0		0		0		0		0		0		0
251	19	F		R	1		1	3 ESPRESSO SHOTS	1	3 ESPRESSO SHOTS	0		0		1	1 CIGARETTE	1	4 Cigarettes	0		1	1 EDIBLE	1	BIRTH CONTROL, ANTIBIOTIC	1	BIRTH CONTROL, ANTIBIOTIC	?	?	0	0		0		1	Depression	0		0		0		1	MOM AND DAD	1	MOM AND DAD	0		0
252	19	M		R	1		1	1 COKE	1	2-3 COKES	0		1	1 BEER	1	2 DIPS	1	4 DIPS	0		0		0		0		?	?	0	0		0		0		0		0		0		0		0		0		0
253	18	M		R	1		0		0		0		0		0		0		0		0		0		0		?	?	0	0		0		0		0		0		0		1	BIPOLAR	0		1	DRUG ABUSE (OXYCONTIN)	0
254	22	M		R	1		1	1 CUP OF COFFEE	1	3 CUPS OF COFFEE	0		0		0		0		0		0		0		0		?	?	0	1	GLASSES?	0		1	Depression	1	GENERALIZED ANXIETY PANIC DISORDER	0		0		1	DEPRESSION, bpd	1	GENERALIZED ANXIETY, PANIC DISORDER	0		0
255	18	F		R	1		1	8 OZ	0		0		0		0		0		0		0		0		0		?	?	1	0	SMALL VISION CORRECTION	0		0		0		0		0		0		0		0		0
256	18	F		R	1		1	CUP OF TEA	1	CUP OF TEA	0		0		0		0		0		0		0		0		?	?	0	0		0		0		0		0		0		1	DEPRESSION	0		0		0
257	18	F		R	1		1	2 CUPS OF COFFEE	1	4 CUPS OF COFFEE	0		0		0		0		0		0		1	150 MG WELLBUTRIN XL	1	300 MG WELLBUTRIN XL	?	?	0	0		0		1	DEPRESSION - ADHD	0		0		1		0		0		0		0
258	20	M		R	1		0		0		0		0		0		0		0		0		0		0		?	?	0	0		0		0		0		0		0		0		0		0		0
260	18	F		L	1		0		0		0		0		0		0		0		0		0		0		?	?	0	0		0		0		0		0		0		0		0		0		0
261	20	F		R	1		0		1	16 OZ	0		0		0		0		0		1	Not Specified	0		0		?	?	0	1	Nearsighted	0		1	Not specified	0		0		0		0		0		0		0
262	19	M		R	1		1	12 OZ	1	24 OZ	0		0		0		0		0		0		0		0		?	?	0	0		0		0		0		0		0		0		1	PILLS FOR EXTREME ANXIETY	0		0
263	19	M		L	1		0		0		0		0		0		0		0		0		0		0		?	?	0	0		0		0		0		0		0		0		0		0		0
264	18	F		R	1		0		0		0		0		0		0		0		0		0		0		?	?	0	0		0		0		0		0		0		0		0		0		0
265	22	M		R	1		0		0		0		0		0		0		0		1	A GRAM OR TWO	0		0		?	?	0	0		0		0		0		0		0		0		0		0		0
266	21	F		R	1		1	6 OZ	0		0		0		0		0		0		0		0		0		?	?	0	0		0		0		0		0		0		0		0		0		0
267	18	M		R	1		0		0		0		0		0		0		0		0		0		1	10 MG MELATONIN	?	?	0	1	WEAR CONTACTS NOT CURRENTLY THOUGH	0		1	MILD OCD	1	MILD SOCIAL ANXIETY	0		1	WPW SYNDROME - HEART - NOT PREVALENT ANYMORE	1	AUNT BIPOLAR	0		0		0
268	19	F		R	1		0		0		0		0		0		0		0		0		0		0		?	?	0	0		0		0		0		0		0		0		0		0		0
269	18	M		R	1		1	150 MG	1	300MG	0		0		0		0		1	100MG EDIBLE	1	100MG EDIBLE	1	5MG WARFARIN	1	18MG/6ML ENOXAPARIN INJECTION 10MG WARFARIN	?	?	1	1	PRESCRIPTION OF -2.25	0		1	DEPRESSION (2012-2015)	1	ANXIETY FOR 3 YEARS	0		1	ANOREXIA NERVOSA	0		1	SISTER	0		0
270	18	F		R	1		1	NOT SPECIFIED	1	1 CUP OF COFFEE	0		0		0		0		0		0		0		0		?	?	0	0		0		0		0		0		0		0		0		0		0
271	18	M		R	0	Amharic	1	Cup of coffee	0		1	Not specified	1	glass of wine	1	one bowl of hookah	0		0		0		1	btu propion	0		?	?	0	0		1	not specified	0		0		0		1	possible ADHD	0		0		0		0
272	20	F		R	1		1	2 CUPS COFFEE	0		0		0		0		0		0		0		1	30 MG PRESCRIBED ADDERALL	0		?	?	0	0		0		0		0		0		1	ATTENTION DEFICIT DISORDER	0		1	MOTHER	0		0
273	18	M		R	1		1	3 CUPS OF COFFEE	0		0		1	3 BEERS	0		0		1	2 BITS	0		1	ALIEVE 2 TABS	0		?	?	0	0		0		0		0		0		0		0		1	MOTHER	0		0
274	19	F	0	R	0	Chinese	0		0		0		0		0		0		0		0		0		0		0	0	0	0		0		0		0		0		0		1	Depression	0		0		0
275	30	M	0	R	1		1	2 CUPS OF COFFEE	0		0		0		0		1	2 smokeless tobacco portions	0		0		0		0		0	0	0	0		0		0		1	PTSD	0		0		0		0		0		0
276	19	Other	Agender	R	1		1	Small cup of coffee	0		0		0		0		0		0		0		1	Zoloft 50 mg	0		1	1	0	1	Astigmatism	0		1	MAJOR DEPRESSIVE DISORDER	1	GENERALIZED ANXIETY DISORDER	0		0		1	Not Specified	1	Generalized Anxiety Disorder	0		0
277	19	F		R	0	Not specified	1	1 cup	0		0		0		0		0		0		0		0		0		0	0	0	0		0		0		0		0		0		0		0		0		0
278	19	F		R	1		0		0		0		0		0		0		0		0		0		0		0	0	0	0		0		0		0		0		0		0		0		0		0
279	21	M		R	1		1	1 Can of soda	1	3 cans of soda	0		1	3 16oz beers	0		0		1	One bowl of flower	1	4 bowls of flower	0		0		0	0	0	0		0		1	Depression	1	GENERAL ANXIETY DISORDER	0		0		0		0		1	ADDICTION TO PRESCRIPTION DRUGS	0
280	21	F		R	1		1	8 OZ	1	16 OZ	0		0		0		0		0		0		0		0		0	0	0	0	0	0		0		1	"highly stress prone" past diagnosis	0		0		0		0		1	Alcoholism	0
281	22	M		R	1		0		0		0		1	3 beers, glass of wine	0		0		0		0		0		0		0	0	0	0		0		0		0		0		0		0		0		0		0
282	26	F		R	1		0		0		0		0		0		0		0		0		0		0		0	0	0	1	Nearsighted	0		0		0		0		0		0		0		0		0
283	17	F		R	1		0		1	"very little"	0		0		0		0		0		1	10 mg	0		0		0	0	0	0		0		1	Bipolar I	1	Generalized Anxiety Disorder	0		0		1	Depression	0		0		0
284	18	M		R	1		0		0		0		0		0		0		0		0		0		0		0	0	0	1	Corrected lenses needed	0		0		0		0		0		0		0		0		0
285	19	F		R	1		0		0		0		0		0		0		0		0		0		0		0	0	0	1	Corrected Vision	0		1	Mild Depression	1	Social Anxiety Disorder	0		0		0		0		0		0
286	19	F		R	1		1	1 Cup	1	1 Cup	0		0		0		0		0		0		0		1	Birth Control	0	0	0	1	Corrected Vision (Contacts)	0		0		1	PTSD	0		0		0		0		1	Alcohol addiction	0
287	23	M		R	1		1	2 Cups of coffee	0		0		0		0		0		0		1	25mg	0		0		0	0	0	0		0		0		0		0		0		0		0		0		0
288	18	F		R	1		0		0		0		0		0		0		0		0		1	Escitalopram (SSRI - 20mg)	0		0	1	0	0		0		1	Depression (Past diagnosis)	1	Severe Anxiety - perscribed medication	0		0		1	Depression	1	Severe anxiety	0		0
289	18	F		R	1		0		1	1 bottle of Coke	0		0		0		0		0		0		0		1	Effexor, Lamictal	1	0	0	1	Corrected vision (Glasses)	0		1	Bipolar, Depression	1	OCD	0		0		1	Bipolar, Depression	0		1	Alcohol addiction	0
290	20	M		R	1		1	2 Cans of soda	1	4 Cans of soda	0		0		0		0		0		0		0		0		0	0	0	1	Nearsighted	0		1	Moderate Depression	0		0		0		0		0		0		0
291	26	M		R	1		0		0		0		0		0		0		0		0		0		0		0	0	1	0	Poor vision	0		0		1	PTSD	0		0		1	Bipolar	1	Panic attacks	1	Drug addiction	0
292	18	F		R	1		0		1	2 cups of coffee	0		0		0		0		0		0		0		0		0	0	0	0		0		0		2	Not Specified	0		0		0		1	Not Specified	0		0
293	40	M		R	1		1	1 Monster energy drink	0		0		0		0		0		0		1	5 'hits'	1	Syntroid 300 mcg (hormone)	0		0	0	0	0		0		1	Depression	1	PTSD	0		0		1	Depression	0		1	Alcohol addiction	0
294	18	F		R	1		0		1	coffee	0		0		0		0		0		0		0		0		0	0	0	1	poor vision but doesn't always need glasses'	0		0		0		0		0		0		0		0		0
295	19	F		R	1		1	1 cup	0		0		0		0		0		0		1	less than 1/16oz	0		1	Lexapro	0	1	1	1	Myopia	0		0		1	Anxiety	0		0		1	Depression	0		0		0
296	18	F		R	1		0		1	black tea for breakfast	0		0		0		0		0		0		0		0		0	0	0	1	Corrected with contacts	0		0		0		0		0		0		0		0		0
297	19	F		R	1		0		1	1 Cup of coffee	0		0		0		0		0		0		1	Birth Control	1	Birth Control	0	0	0	0		0		0		0		0		0		1	Depression	0		1	Alcohol and tabacco addiction	0
298	20	M		R	1		0		0		0		0		0		0		0		0		0		0		0	0	0	0		0		0		0		0		0		0		0		0		0
299	19	F		R	1		0		0		0		0		0		0		0		0		0		0		0	0	0	0		0		0		0		0		0		0		0		0		0
300	19	F		R	1		0		1	1 Cup	0		0		0		0		0		0		0		0		0	0	0	0		0		1	Depression	1	Not Specified	0		0		1	Not Specified	1	Not Specified	0		0
301	21	F		R	1		1	250 mg	0		0		1	2 drinks	0		0		0		0		0		1	Citalopram	0	1	0	0		0		0		1	Not Specified	0		0		1	Depression	1	Anxiety	0		0
302	18	F		R	1		0		0		0		0		0		0		0		0		0		0		0	0	0	1	Astigmatism	0		0		0		0		0		1	Depression	0		0		0
303	18	M		L	0	Spanish	0		0		0		0		0		0		0		0		0		0		0	0	0	0		0		0		0		0		0		0		0		1	Alcohol addiction?	0
304	21	M		Ambidextrous	1		0		0		0		0		0		0		0		1	1 gram	0		0		0	0	0	0		0		0		0		0		0		1	Depression/serotonin deficiency	0		0		0
305	19	F		R	1		1	Cup of coffee	1	Cup of coffee & energy drink	0		0		1	1 cigarette	1	6 cigarettes	0		0		0		0		0	0	0	0		0		1	Depression	0		0		0		1	Depression (father/mother)	0		1	Alcohol addiction	0
306	18	F		R	1		1	little tea	0		0		0		0		0		0		0		0		0		0	0	0	0		0		0		0		0		0		0		1	mother, not specified	0		0
307	19	F		L	1		1	16 oz	0		0		0		0		0		0		0		1	Paxil 20mg	1	Paxil 40mg	1	1	0	1	glasses needed	0		1	Major Depressive Disorder (moderate)	1	GAD	0		0		0		1	PTSD (mother)	0		0
308	21	F		R	1		0		0		0		0		0		0		0		1	less than a gram	0		0		0	0	0	1	corrected vision	0		0		1	academic test taking (?)	0		0		0		0		0		0
309	19	F		R	1		0		0		0		0		0		0		0		0		1	Naturethroxel (1mg)	1	Melatonin (1mg)	0	0	0	1	Nearsighted			0		0		0		0		0		0		0		0
310	20	M		R	1		0		0		0		0		0		0		0		0		0		0		0	0	1	1	Nearsighted	0		0		0		0		0		0		0		0		0
311	19	F		R	1		0		1	1 cup	0		0		0		0		0		1	3 hits?	0		0		0	0	0	0		0		0		0		0		1	Insomnia	1	Bilpoler	0		1	alcohol/substance addiction	0
312	19	M		R	1		0		0		0		0		0		0		0		0		0		0		0	0	0	0		0		0		0		0		0		0		0		0		0
313	21	M		R	1		1	2 coffee	1	4 coffee	1	2 beers	1	6 beers	0		0		0		0		1	Methylpenidate (50mg)	1	Methylpenidate (60 mg)	0	0	0	0		0		0		0		0		0		1	Depression	0		0		0
314	19	F		R	1		1	2 cups	1	3 cups	0		0		0		0		0		0		0		1	Vyvanse	0	?	0	1	Nearsighted and astigmatizm	0		1	Depression (Past diagnosis)	1	Not Specified	0		0		1	Bipoler	1	Not Specified	1	Alcohol addiction	0
315	18	F		R	1		0		0		0		0		0		0		0		0		1	Gabapentin, Sertraline (200mg)	0		1	0	1	0		0		1	Depression	1	GAD	0		0		1	Bipolar, Depression	0		0		0
316	19	F		R	1		0		0		0		0		0		0		0		0		0		0		0	0	0	0		0		0		0		0		0		1	Depression	0		0		0
317	20	F		Ambidextrous	1		1	16 oz	1	32 oz	0		0		0		0		0		0		1	Levora (Birth Control) 1 tab	0		0	0	0	1	Astigmatism, near-sighted	0		0		0		0		0		0		0		0		0
318	26	F		R	1		1	1 Coke	1	1 coke	0		0		0		0		1	3 dabs	1	6 dabs	0		0		0	0	0	0		0		1	Major depression	1	PTSD/Anxiety	0		0		1	Depression	1	Anxiety	1	Alcohol/cocaine abuse	0
319	17	F		R	1		0		0		0		0		0		0		0		0		0		1	Effexor	0	0	0	0		0		1	Depression	1	GAD/OCD	0		0		1	Bipolar Disorder	0		0		0
320	22	M		R	1		0		0		0		1	3 glasses	0		0		0		1	<1 gram	0		1	Prescription eyedrops (1 drop)	0	0	0	1	Ocular pressure	0		0		0		0		0		1	Maternal side (not specified)	0		1	Maternal side (not specified)	0
321	25	F		R	1		1	8 oz coffee	1	8 oz coffee	0		1	4 oz	0		0		0		1	1 gram	0		1	skyla IUD	0	0	0	1	corrected vision	0		0		1	GAD, Social Anxiety	0		0		1	mother- depression	1	mother- GAD	0		0
322	19	F		R	1		0		0		0		1	~ 2 oz	0		0		0		0		0		0		0	0	0	0		0		0		0		0		0		0		0		1	Alcoholism	1	ADD/ ADHD
324	21	F		R	1		0		0		0		0		0		0		0		0		0		1	Birth control, fish oil, vit. D	0	0	0	1	Far sighted	0		0		0		0		0		0		1	mother, sister - not specified	0		0
325	20	M		L	1		1	24 oz	1	64 oz	0		0		0		0		0		1	2 grams	0		0		0	0	0	0		0		0		0		0		0		0		0		0		0
326	19	F		R	1		1	1 cup of coffee	0		0		0		0		0		0		0		0		0		0	0	0	0		0		0		1	Not Specified	0		0		1	Bipolar, depression	1	Not Specified	1	alcohol and drug addiction	0
328	18	M		R	1		1	80 mg	0		0		0		1	8 mg	0		0		1	50 mg	1	Prozac 40mg	0		1	0	0	0		0		1	Depression	0		0		0		1	Depression (mother)	1	sister (not specified), PTSD (mother)	0		0
329	23	M		L	1		0		1	1 cup	0		0		0		0		0		0		0		0		0	0	0	1	double stigmatism	0		1	Depression	1	GAD	0		0		1	Depression	1	GAD	0		0
330	20	M		R	1		1	1 cup	1	2 cups	0		1	1 drink	0		0		0		0		0		0		0	0	0	0		0		0		0		0		0		0		0		0		0
331	21	F		R	1		1	1 small cup	0		0		1	2 8% beers	0		0		0		0		0		1	Vyvanse 30 mg	0	0	0	0		0		0		0		0		1	ADD	0		0		0		0
332	29	M		R	1		0		0		0		0		0		0		0		0		0		0		0	0	0	1	Astigmatism	0		1	Depression	1	Anxiety	0		0		0		0		0		0
333	19	F		R	1		0		1	tea	0		0		0		0		0		1	0.5 g	0		1	Adderall, lexapro	1	1	0	1	corrected vision	0		1	Minor depression	1	anxiety	0		1	ADHD	0		0		0		0
334	19	F		L	1		0		0		0		0		0		0		0		0		0		0		0	0	0	0		0		0		1	Anxiety	0		0		1	Depression	0		0		0
335	19	M		R	1		0		0		0		0		0		0		0		0		0		0		0	0	0	1	Corrected vision	0		0		1	Social Anxiety Disorder	0		0		0		0		0		0
336	21	F		R	1		0		1	1 cup coffee	0		1	1 beer	0		0		0		0		0		0		0	0	0	0		0		0		1	Agoraphobia, Anxiety	0		0		1	Depression	1	Anxiety	0		0
337	20	F		R	1		0		0		0		0		0		0		0		0		0		1	Cymbalta	1	0	0	1	Uses reading glasses	0		1	Depression	0		0		0		1	Brother, Mother	1	Mother	0		1	mother- seizures
338	22	M		R	1		0		0		0		1	2 beers	0		0		0		1	a couple puffs	0		0		0	0	0	0		0		0		0		0		0		0		0		0		0
339	19	F		R	1		1	coffee	0		0		1	4 shots	0		0		0		0		0		0		0	0	0	0		0		0		0		0		0		0		0		0		0
340	22	M		R	1		0		0		0		0		0		0		0		0		0		0		0	0	0	1	near sighted	0		1	Depression	1	Anxiety	0		0		1	Bipolar	0		1	Alcoholism	0
341	19	F		R	1		0		0		0		0		0		0		0		0		0		0		0	0	0	1	uses contacts	0		0		0		0		1	Dyslexia	0		0		0		0
342	19	M		L	1		1	1 cup	0		0		1	2 glasses of wine	0		0		0		1	2 joints	0		1	wellbutrin and fluoxetine	1	1	0	0		0		0		1	PTSD related symptoms	0		0		0		1	Mom	0		0
343	22	M		R	1		1	a cup	0		0		0		0		0		0		0		0		0		0	0	0	0		0		0		0		0		0		0		0		0		0
344	18	M		R	1		1	1 cup of soda	1	2 cups of soda	0		0		0		0		0		1	4 bowls	0		0		0	0	0	0		0		0		0		0		0		1	Depression (mother)	0		0		0
345	24	M		L	1		0		1	1 can cola	0		0		1		1	1 mini cigar	0		1	A hit or two	0		0		0	0	0	0		0		0		1	PAST DIAGNOSIS, parents divorced/ girlfriend moved away	0		0		0		0		0		0
346	19	M		R	1		1	1 cup of tea	0		0		0		0		0		0		0		0		0		0	0	0	1	slight astigmatism	1	migraines	0		0		0		0		1	Depression	0		1	cocaine addiction	0
347	18	M		R	1		1	1 cup coffee	0		0		0		0		0		0		1	few dabs	0		0		0	0	0	0		0		0		0		0		0		0		0		0		0
349	23	M		L	0	Spanish	0		0		0		0		0		0		0		0		0		0		0	0	0	0		0		0		0		0		0		0		0		0		0
350	19	M		R	1		0		1	1 cup coffee	0		1	6 beers	0		1	1 chew	0		0		0		0		0	0	0	0		0		0		0		0		0		0		0		0		0
351	21	F		R	1		0		0		0		0		0		0		0		0		0		0		0	0	0	0		0		1	Bipolar Disorder	0		0		1	ADHD	1	Mother (not specified)	0		1	Mother/Grandparents	0
352	20	F		R	1		0		0		0		0		0		0		0		0		0		0		0	0	0	0		0		0		0		0		0		0		0		0		0
353	19	F		L	1		1	50 mg	0		0		0		0		0		0		0		0		0		0	0	0	0		0		0		0		0		0		0		1	Father (not specified)	0		0
354	19	M		R	1		1	1 coffee	0		0		0		0		0		0		0		0		0		0	0	0	0		0		0		0		0		0		0		0		1	Alcohol	1	Schizophrenia
355	21	M		R	1		1	2 cups coffee	1	4 cups coffee	0		1	3 beers	1	chew	1	chew	0		1	0.5 gram	0		1	4 10 mg adderal	0	0	0	1	Not specified	0		0		0		0		0		0		1	Not Specified	1	NOT SPECIFIED	0
356	18	M		R	1		0		0		0		0		0		0		0		0		0		0		0	0	0	1	nearsighted (corrected vision)	0		0		0		0		0		0		0		0		0
357	19	M		R	1		1	1 soda	1	a couple sodas	0		0		0		0		1	a little	1	a lot	0		0		0	0	0	1	corrected vision (contacts)	0		0		0		0		0		0		1	Not Specified	0		0
358	18	F		R	1		0		0		0		0		0		0		0		0		0		1	flonase, singulair, zurtec, amitryptilia, vitamin D, oneaday vitamins	1	0	0	0		1	complex chiari 1.5 mal formation (had decompression surgery)	1	Depression	1	GAD, OCD	0		0		0		0		0		0
359	19	F		R	1		1	1 soda	1	2 sodas	0		0		0		0		0		0		0		0		0	0	0	1	Myopia	0		1	Depression	1	Not Specified	0		0		0		0		0		0
360	25	M		Ambidextrous	1		0		0		0		0		0		0		0		1	0.5 g	0		0		0	0	0	0		0		0		0		0		0		0		0		0		0
361	19	F		R	1		0		1	1 cup	0		0		0		0		0		0		0		0		0	0	0	0		0		0		1	Not Specified	0		0		1	Depression	0		1	Alcoholism	0
363	MISSING	PERSONALITY	INVENTORY
364	22	M		R	1		0		1	1 cup of coffee	0		0		0		0		1	small amount	0		1	pill (not specified)	0		0	0	0	0		0		0		0		0		0		0		0		0		0
366	25	M		R	1		1	1 cup of coffee	0		0		0		0		0		0		0		0		0		0	0	0	0		0		1	Depression	1	Social Anxiety, Panic attacks	0		0		0		0		1	Opiate and alcohol addiction (father)	0
368	19	M		R	1		1	1 cup of coffee	1	1 cup of coffee	0		0		1	2 pouches	1	2 pouches	0		0		0		0		0	0	0	0		0		0		0		0		0		0		0		0		0
369	18	M		R	1		0		0		0		0		1	2 cigs	1	6 cigs	1	1 dab	1	7 dabs	0		0		0	0	0	0		0		0		0		0		0		0		0		0		1	Schizophrenia (uncle)
370	22	M		R	1		0		0		0		1	4 beers	0		0		0		1	0.2 (not specified)	0		0		0	0	0	1	Near-sighted	0		0		0		0		0		0		0		0		0
371	22	M		R	1		0		0		0		0		0		0		0		0		1	Adderall (5 mg)	0		0	0	0	0		0		0		0		0		0		0		0		0		0
372	19	M		R	1		0		0		0		0		0		0		0		0		0		1	Singulair (lung medication)	0	0	0	1	Correct vision	0		0		1	GAD	0		0		0		1	Mom, sister, aunt, cousins, grandma (Disorder not specified)	0		0
373	22	M		Not specified	Not specified		0		1	1 can soda	0		0		0		0		0		0		0		0		0	0	0	0		0		0		0		0		0		0		0		0		0
374	22	M		R	1		0		0		0		0		0		0		0		0		0		0		0	0	0	0		0		0		0		0		0		0		0		0		0
375	19	M		R	1		1	1 cup	1	1 cup	0		1	1 beer	0		0		0		0		0		0		0	0	0	0		0		0		0		0		0		0		0		0		0
376	20	M		R	1		0		0		0		0		0		0		1	1 bowl	1	a lot	1	1 tablet Ritalin	0		0	0	0	0		0		0		1	PTSD	0		0		1	Depression	0		1	Alcoholism	0
378	18	M		R	1	Spanish	0		0		0		0		0		0		0		1	1 puff of a blunt	0		0		0	0	0	1	Corrected vision (contacts)	0		0		0		0		0		1	Brother (not specified)	0		1	Uncle (not specified)	0
379	21	M		R	1		0		0		0		1	3 beers	0		0		0		0		0		0		0	0	0	0		0		0		0		0		0		0		0		0		0
380	18	M		R	1		0		0		0		0		0		0		0		1	2 grams	0		0		0	0	0	1	Corrected vision (contacts)	0		0		0		0		0		0		0		0		0
381	18	F		R	1		0		0		0		0		0		0		0		0		0		0		0	0	0	0		0		0		1	Not specified	0		0		0		1	Not specified	0		0

## Sheet: Depressive Symptoms
Subject Number	Q1	Q2	Q3	Q4	Q5	Q6	Q7	Q8	Q9	Q10	Q11	Q12	Q13	Q14	Q15	Q16	Q17	Q18	Q19	Q20	Total
116	1	2	0	2	0	1	3	3	1	2	1	3	1	0	0	3	0	0	0	0	17
118	2	1	1	3	2	1	2	3	1	1	3	3	0	1	0	3	1	1	2	2	25
119	2	2	1	0	2	3	3	1	1	0	2	1	1	3	0	2	0	2	3	0	37
121	0	1	0	1	0	0	0	3	0	0	2	3	0	0	0	3	0	0	0	0	9
124	0	0	0	2	1	0	1	2	0	0	0	3	1	1	0	3	0	1	0	0	11
125	0	3	0	3	3	1	1	3	0	1	1	3	1	0	0	3	1	1	0	2	19
126	0	0	0	3	2	0	2	2	0	0	2	3	0	0	0	3	0	0	0	1	12
130	1	1	1	2	3	2	2	2	0	1	2	1	2	1	0	2	0	2	1	1	29
131	0	1	0	2	1	0	2	2	0	0	0	2	0	0	0	2	0	0	0	0	12
132	1	3	1	1	3	2	1	1	0	1	3	2	3	3	3	2	0	1	3	3	41
133	2	2	0	1	1	0	0	3	0	0	0	3	0	3	0	3	0	0	0	0	14
136	1	0	0	2	2	0	1	2	0	0	3	3	2	1	1	3	0	0	0	1	18
137	0	0	0	0	0	0	3	3	0	0	0	3	0	0	0	3	0	0	0	0	10
138	0	1	0	3	2	0	2	1	0	0	1	3	N/A	1	1	0	2	2	1	2	24
139	0	2	0	2	2	0	2	2	0	1	2	2	1	1	0	3	0	1	0	2	21
140	2	0	1	0	2	1	1	1	1	2	1	0	0	2	1	1	1	1	0	0	30
141	0	0	0	3	1	0	1	3	0	0	0	3	0	1	0	3	0	1	0	0	8
142	0	2	0	2	2	0	0	3	0	2	2	3	0	0	0	3	1	1	1	0	16
143	2	2	2	1	3	3	3	2	2	3	1	1	2	3	2	1	3	3	3	3	51
144	0	0	0	3	1	0	0	2	0	0	1	3	0	0	0	3	0	0	0	0	7
145	1	0	1	2	3	1	2	1	0	1	3	2	0	0	0	3	0	1	2	1	24
146	2	0	0	3	0	0	2	3	0	0	0	3	0	0	0	3	0	0	0	1	9
147	0	1	1	3	1	0	0	3	0	2	0	2	1	0	1	3	0	1	1	0	14
148	0	1	0	2	1	0	1	2	0	0	1	2	0	0	0	2	0	0	1	1	14
149	0	0	0	3	1	0	0	3	0	1	1	3	1	1	0	3	0	1	0	0	10
150	0	0	0	2	1	1	0	2	0	0	1	2	0	0	1	2	0	1	0	1	14
151	0	1	0	2	1	0	0	2	0	0	0	3	0	0	0	2	0	0	0	0	9
152	1	0	0	3	1	0	1	2	0	0	0	3	1	0	0	2	0	1	0	0	11
153	0	0	0	3	1	2	3	3	0	0	0	3	0	1	0	3	1	1	1	0	14
155	0	1	0	2	1	0	1	3	0	0	3	3	1	0	0	3	0	0	0	0	12
156	0	0	0	2	1	0	1	3	0	1	1	3	0	0	0	3	0	0	0	1	10
157	2	0	1	1	3	0	0	2	0	0	2	3	1	1	0	2	1	1	0	0	20
158	1	0	0	3	3	0	1	1	0	1	3	2	2	0	2	2	0	1	0	3	25
159	0	1	1	2	3	1	1	2	1	1	0	2	1	1	1	2	1	1	1	1	24
161	2	0	2	1	2	1	1	1	1	0	0	1	2	2	1	1	0	1	2	0	29
162	1	1	0	2	1	1	0	2	0	1	1	3	1	0	0	3	2	1	0	1	17
163	N/A	2	2	2	2	2	1	3	0	3	1	1	1	3	0	2	1	2	1	1	30
164	0	0	0	3	1	1	3	3	0	0	1	3	0	1	0	3	1	1	0	1	14
165	1	0	0	3	2	0	2	2	0	0	0	3	3	0	0	3	0	0	0	0	13
167	0	0	0	3	0	0	0	2	0	0	1	2	0	0	0	2	0	0	0	0	8
168	0	1	3	0	2	3	3	1	2	1	2	1	2	2	0	1	0	3	2	2	41
169	1	3	2	2	3	2	2	3	1	2	2	2	2	2	3	2	0	1	2	2	37
170	0	2	1	3	2	0	3	2	0	0	2	3	1	1	0	3	1	0	0	1	19
171	2	2	0	1	2	1	1	1	1	0	2	2	1	2	1	2	1	2	1	1	30
172	1	1	3	3	2	3	2	2	0	0	1	1	2	3	1	1	2	3	0	1	34
173	1	0	2	1	3	2	3	2	2	2	3	1	1	1	2	2	2	2	1	0	37
174	0	0	0	3	1	0	0	3	0	1	1	3	1	0	0	3	1	2	0	0	11
175	1	2	1	1	3	1	2	3	0	1	3	2	1	2	0	2	2	2	1	1	31
176	2	0	1	3	3	1	1	3	0	2	1	2	1	1	1	2	1	1	0	2	24
177	0	0	0	0	1	0	0	3	0	0	0	3	1	0	0	3	0	0	0	1	10
178	0	0	0	3	0	0	0	3	0	0	1	3	0	0	0	3	0	0	0	0	5
179	0	0	0	2	1	2	0	3	0	1	1	3	0	1	1	2	0	0	0	0	13
180	0	1	0	3	0	0	0	3	0	2	1	3	0	2	0	3	0	0	0	0	10
181	0	1	0	2	1	1	0	2	0	0	0	2	0	1	0	2	0	1	1	0	14
182	0	1	1	3	1	1	0	2	1	0	0	3	0	1	0	3	0	0	0	0	11
184	1	2	3	3	2	0	0	2	0	3	2	1	2	1	0	2	0	2	1	1	28
185	1	3	3	2	2	2	2	2	0	0	1	2	2	3	2	2	1	3	1	2	36
186	0	1	0	0	1	0	0	0	0	0	0	3	0	0	0	3	0	0	0	0	12
187	1	1	3	1	1	3	1	2	2	2	2	1	3	3	3	2	0	3	3	2	43
188	1	1	1	1	3	1	1	1	1	0	2	2	1	1	1	1	0	1	1	1	28
189	2	1	2	3	2	2	1	2	1	2	2	3	1	1	3	3	1	2	3	1	32
190	0	0	0	3	1	0	3	3	0	0	2	3	0	0	0	3	0	0	0	1	11
191	1	0	0	3	1	0	1	2	0	0	2	3	0	0	0	3	0	1	0	2	13
192	1	0	0	3	1	0	1	3	0	0	0	3	0	0	1	3	1	1	0	0	10
194	0	1	1	1	2	2	2	2	0	2	2	2	1	0	0	2	1	1	2	1	27
195	0	2	0	3	0	0	1	2	0	0	2	3	1	0	0	2	0	0	0	2	14
196	0	0	0	3	0	0	2	2	0	0	0	3	0	0	0	3	0	0	0	0	7
197	0	0	0	3	1	0	3	3	0	0	0	3	0	0	0	3	0	1	0	0	9
198	1	0	0	1	1	2	2	2	0	2	0	1	2	3	1	2	0	1	1	1	27
199	1	0	1	3	0	0	2	3	0	0	0	3	1	0	0	3	0	1	0	1	11
200	1	3	2	0	3	2	1	0	0	1	3	0	1	2	0	1	2	1	0	1	38
201	BLANK	2	0	2	1	1	0	2	0	0	0	2	0	0	0	2	0	1	0	0
202	1	1	0	3	3	0	1	2	0	1	1	3	0	1	2	3	0	0	1	1	18
203	1	3	2	3	3	1	3	1	0	0	3	1	1	3	1	1	0	2	1	0	34
204	0	0	0	1	1	1	1	2	1	2	3	2	0	1	0	2	1	1	0	2	23
205	0	0	0	3	1	0	0	3	0	0	0	3	1	1	0	2	0	0	0	0	8
206	0	0	0	2	3	2	1	0	2	1	2	2	0	0	0	2	0	2	1	0	24
207	2	1	0	2	2	0	2	3	0	0	2	3	1	0	0	2	1	1	0	2	20
208	1	3	2	1	2	2	2	1	0	1	3	1	2	2	1	1	2	2	1	2	40
209	0	1	0	2	3	1	0	3	0	1	2	3	1	1	0	3	0	0	1	0	16
209A	1	0	0	3	0	1	0	2	0	0	0	3	1	0	0	3	1	1	0	1	11
210	0	1	0	3	1	1	1	2	1	0	0	3	0	1	0	2	0	1	1	0	14
211	0	1	1	3	1	0	1	3	0	0	1	3	0	0	1	3	0	0	0	0	10
212	1	3	3	1	3	3	3	1	3	2	3	1	3	3	2	1	2	3	3	3	55
213	0	1	0	1	2	0	1	2	0	0	0	3	0	1	0	3	0	0	1	1	14
214	0	0	0	3	1	0	0	3	0	0	1	3	2	0	0	3	0	0	0	1	9
215	0	0	0	0	1	0	0	1	0	0	1	3	1	1	0	3	0	0	0	0	13
215A	2	2	0	3	1	1	0	2	0	1	2	3	3	3	2	3	1	1	1	0	25
216	2	0	1	3	3	2	1	1	1	3	3	2	2	1	2	2	0	2	2	1	34
217	2	1	2	1	2	3	3	2	2	2	1	2	2	2	1	2	1	2	1	3	39
218	0	1	0	2	0	1	0	2	0	1	1	2	0	1	0	1	1	1	1	1	18
219	1	1	1	1	2	2	2	1	2	1	2	2	2	2	2	2	2	2	3	2	39
220	1	0	0	3	2	0	0	3	0	1	2	3	1	0	1	3	0	0	0	1	13
221	0	1	0	3	1	0	0	3	0	0	0	3	1	0	0	3	0	0	0	0	7
222	2	1	0	3	1	2	2	3	0	1	1	3	0	1	0	3	0	1	0	0	16
223	0	1	0	3	3	0	1	2	0	1	2	2	1	1	0	2	0	0	0	3	20
224	0	0	0	1	2	2	1	2	0	0	1	1	0	2	0	2	0	2	2	0	22
225	1	0	2	0	3	2	0	2	0	0	1	2	2	2	0	3	0	3	0	0	25
226	1	2	1	3	1	0	0	3	0	0	1	3	1	2	1	3	1	1	0	0	16
227	1	1	0	2	2	1	2	2	0	1	1	2	1	1	2	3	0	1	0	2	23
228	0	0	0	1	0	0	1	3	0	1	1	3	0	0	1	3	0	0	0	0	10
229	0	1	0	2	0	1	1	1	0	0	1	2	0	0	0	2	0	1	0	0	14
230	0	2	0	3	2	0	2	2	0	0	1	2	0	0	1	3	0	0	0	1	15
231	1	1	0	2	2	1	1	3	0	0	1	3	0	1	0	3	1	1	1	1	17
232	2	0	0	2	2	0	0	2	0	1	3	2	1	1	1	2	0	0	1	0	20
233	0	1	0	3	1	0	1	3	0	1	0	3	1	1	0	3	0	0	0	1	11
234	2	0	1	1	1	0	2	2	1	2	0	2	1	1	0	2	1	1	1	1	24
235	0	0	0	3	1	0	0	2	0	1	0	2	0	0	0	2	0	0	0	1	10
236	1	0	1	3	2	0	2	3	0	0	0	3	0	0	0	3	0	0	0	0	10
237	1	3	3	1	2	3	3	2	1	2	3	2	3	3	1	1	3	3	3	3	50
238	0	0	1	2	2	0	2	2	0	0	0	3	1	0	0	3	1	1	0	0	14
239	0	1	1	3	2	1	0	2	0	1	1	2	0	0	0	2	1	1	0	1	17
240	0	1	0	BLANK	1	0	3	2	1	1	1	2	0	1	0	3	0	1	1	0	#VALUE!
241	1	1	0	2	0	0	1	3	0	1	1	2	1	1	0	3	1	0	0	0	14
242	0	0	0	2	1	0	1	3	0	0	1	3	0	1	0	3	0	0	0	0	9
243	1	2	2	3	1	2	2	2	0	2	3	2	2	2	1	3	1	1	2	2	32
244	0	0	0	3	0	0	0	3	0	0	0	3	1	0	0	3	0	0	0	0	5
245	1	2	0	2	3	0	2	2	1	0	1	2	1	0	1	2	0	0	0	2	22
246	1	0	0	0	BLANK	1	0	0	0	0	2	3	0	0	1	3	1	1	0	0	17
247	1	2	1	1	3	1	1	1	3	2	1	2	1	2	2	2	2	2	2	3	39
249	0	0	0	3	2	0	1	3	0	0	1	3	0	0	0	3	0	1	0	0	9
250	0	0	0	3	1	0	2	2	0	0	2	2	1	0	0	2	0	0	0	0	13
251	1	2	0	3	2	1	1	2	0	0	1	3	0	1	0	3	0	1	0	2	17
252	0	0	0	3	1	0	2	2	0	1	1	2	1	1	2	2	0	1	0	0	17
253	1	2	2	1	1	1	2	1	2	3	3	1	3	2	0	1	0	2	2	3	41
254	1	2	2	3	1	2	2	3	0	1	3	1	1	3	0	1	0	2	0	3	31
255	0	2	0	2	3	0	1	1	0	0	3	2	1	0	0	2	1	1	1	0	22
256	0	1	0	3	0	0	0	3	0	0	0	3	0	0	0	3	0	0	0	0	5
257	1	1	3	1	2	2	1	1	2	1	2	1	2	2	2	2	2	2	1	3	40
258	0	0	0	2	0	0	1	2	0	0	0	2	0	0	0	2	0	0	0	0	9
260	0	0	0	3	1	0	3	3	0	0	0	3	0	0	0	3	0	0	0	2	10
261	0	0	1	2	0	0	0	2	0	0	0	2	0	0	1	2	0	1	0	0	11
262	1	0	1	2	3	1	1	2	1	2	2	2	1	1	0	2	0	2	1	1	26
263	0	0	0	3	0	0	0	2	0	0	1	3	0	0	0	3	0	0	0	0	6
264	1	2	1	2	2	1	2	1	0	0	2	2	2	1	1	2	2	3	1	1	31
265	0	1	0	3	1	0	3	3	0	0	0	3	0	0	0	3	0	0	0	0	9
266	1	1	0	3	1	0	1	2	0	0	0	3	0	0	0	3	0	1	0	0	10
267	1	1	2	1	1	2	2	2	1	3	1	2	0	1	2	1	0	2	2	1	32
268	0	0	0	3	0	0	0	2	0	0	0	3	0	0	0	3	0	0	0	0	5
269	DID NOT FILL OUT - NOT IN PACKET																				16
270	0	1	0	2	0	0	1	3	0	0	0	3	0	0	0	3	0	0	0	0	7
271	1	0	1	2	2	1	1	1	1	0	0	2	2	1	0	2	0	1	0	0	20
272	1	2	2	1	1	1	1	2	1	1	1	2	1	3	0	2	0	2	1	1	28
273	0	0	0	1	2	1	0	3	0	0	1	3	1	0	0	3	0	0	0	0	11
274	0	0	0	2	1	1	3	2	1	0	0	2	0	0	0	3	0	1	0	0	14
275	0	0	0	3	1	0	0	3	0	0	0	3	0	0	1	3	1	1	1	0	9
276	1	2	2	0	1	2	1	1	0	3	3	1	2	3	2	1	1	2	2	1	41
277	1	3	2	0	2	1	2	2	0	2	3	2	0	0	0	2	1	1	2	2	32
278	0	0	0	3	1	0	2	2	0	0	0	2	0	0	0	3	0	1	1	1	12
279	1	0	2	0	1	3	2	1	1	3	3	1	2	3	0	1	1	2	3	2	42
280	2	0	0	1	3	0	2	2	1	1	0	2	1	1	0	2	2	1	0	1	24
281	0	0	0	2	0	1	0	2	0	1	0	2	0	2	0	2	1	1	1	0	15
282	0	0	0	3	1	0	0	3	0	0	2	3	0	0	0	3	0	0	0	1	8
283	2	1	1	2	0	1	0	1	0	2	2	2	2	1	1	2	1	1	1	0	25
284	0	0	0	3	1	0	0	3	0	0	1	3	0	0	1	3	0	0	0	0	7
285	1	1	1	3	1	1	1	2	0	1	1	3	1	1	0	3	1	1	1	1	19
286	1	0	0	0	2	1	1	2	0	2	0	3	2	1	0	3	0	1	0	1	20
287	0	1	1	3	0	1	0	2	1	0	2	2	1	2	0	2	0	1	0	0	17
288	1	1	0	3	1	1	0	3	0	1	1	3	2	0	Multiple Responses	N/A	0	1	0	0	#VALUE!
289	1	2	2	0	2	1	1	1	1	1	3	0	1	2	2	0	3	2	3	2	44
290	0	0	0	2	2	1	1	1	0	0	2	3	0	0	1	3	0	0	1	0	15
291	0	0	0	3	1	1	1	3	0	0	2	3	0	0	0	3	0	0	0	0	9
292	0	2	0	0	2	0	1	2	0	0	0	2	1	2	0	2	1	1	1	1	22
293	2	1	2	1	3	2	2	1	2	0	2	1	3	2	0	1	2	2	1	2	40
294	0	1	0	3	1	0	2	3	0	0	1	3	1	0	0	3	0	0	0	1	11
295	1	1	0	2	0	0	1	2	0	1	0	3	0	1	0	2	2	1	1	1	17
296	1	1	1	2	1	1	0	2	0	1	1	2	1	1	0	2	1	2	1	0	21
297	3	1	2	2	2	1	1	2	0	0	1	2	1	1	1	2	1	3	2	1	29
298	2	0	1	0	1	2	1	1	1	2	0	1	1	1	0	1	1	2	1	2	31
299	0	1	0	3	2	0	1	2	0	0	0	3	0	0	1	3	0	0	0	1	11
300	0	2	1	0	2	1	1	2	0	0	2	1	1	2	0	1	0	1	1	1	27
301	0	0	1	1	1	2	1	2	0	2	3	2	1	2	2	2	0	2	2	1	29
302	0	0	1	1	2	1	2	3	0	1	1	2	0	1	0	2	1	1	0	0	19
303	N/A	0	0	3	2	0	3	3	0	1	2	3	1	0	1	3	0	0	1	2	17
304	0	1	0	3	1	0	1	3	0	1	2	3	1	1	1	3	0	1	0	2	16
305	1	1	1	3	0	1	0	3	0	0	1	1	1	0	0	2	0	1	0	1	15
306	0	0	0	3	0	0	1	3	0	0	1	3	0	0	0	3	0	0	0	0	6
307	1	0	1	1	2	1	1	1	0	1	2	1	1	0	1	1	0	0	2	2	27
308	0	0	0	3	2	0	0	3	0	0	1	3	0	3	0	2	0	1	0	0	12
309	1	2	1	3	0	1	1	2	0	0	1	3	2	1	0	3	0	1	0	1	17
310	2	0	1	1	2	1	2	1	1	0	0	2	1	2	2	2	0	2	2	1	29
311	0	2	0	3	1	1	1	2	0	0	2	3	0	0	0	3	0	0	0	1	13
312	0	0	0	3	1	0	2	3	0	0	0	3	0	0	0	3	0	0	0	0	7
313	0	0	0	2	1	0	1	2	0	1	1	3	1	0	0	3	0	0	0	0	11
314	N/A	3	2	1	3	3	2	2	2	3	3	1	2	3	3	2	1	2	3	3	48
315	0	2	2	3	3	2	2	1	0	1	3	1	2	2	0	2	2	3	0	1	34
316	1	1	1	2	0	1	0	1	0	0	0	1	1	0	0	1	0	1	1	0	18
317	2	1	3	1	1	1	1	2	1	1	2	1	2	3	1	1	1	2	2	2	37
318	0	1	2	3	1	1	2	3	0	1	0	2	0	0	1	2	1	1	0	2	19
319	1	2	1	1	1	2	2	1	0	2	2	2	1	2	1	2	0	1	1	3	32
320	2	3	2	1	1	2	2	1	0	0	3	1	3	3	1	1	0	3	2	2	41
321	1	0	0	3	0	0	1	2	0	1	2	2	0	0	0	2	0	1	0	1	14
322	0	1	1	2	2	2	2	1	0	1	3	2	0	1	0	2	0	0	1	1	24
324	1	2	1	1	2	1	1	1	0	2	2	1	1	2	1	1	1	2	2	2	35
325	0	0	0	3	1	2	2	2	0	2	3	3	1	2	0	3	1	2	3	0	24
326	2	1	1	3	2	0	2	3	0	1	2	2	2	2	0	3	1	1	0	0	22
328	0	1	1	3	1	1	3	2	0	1	0	3	0	1	0	3	0	1	2	0	17
329	1	2	1	2	3	2	3	2	1	1	3	2	1	2	3	2	0	1	3	2	37
330	1	0	0	3	2	0	0	2	0	0	1	3	2	0	0	2	0	0	0	1	13
331	0	1	2	2	2	1	1	1	1	1	1	3	0	0	0	2	0	1	0	0	19
332	1	0	1	2	2	1	2	2	1	2	2	1	0	2	2	1	0	2	2	1	31
333	2	1	1	2	2	1	0	3	0	2	2	2	1	1	1	2	0	0	0	0	21
334	2	0	2	1	1	1	1	3	0	1	1	3	0	0	1	3	3	2	1	0	22
335	0	0	0	3	1	0	0	3	0	0	1	3	1	0	0	3	0	0	0	1	8
336	1	0	2	3	3	1	1	2	1	2	1	2	0	2	0	2	0	1	0	2	24
337	1	1	2	1	2	2	1	1	2	0	3	1	2	1	2	2	0	2	2	2	36
338	0	0	0	3	0	0	3	3	0	0	0	3	0	0	0	3	0	0	0	0	7
339	1	2	1	1	1	1	2	2	0	0	3	2	1	3	2	2	0	2	2	3	33
340	0	0	1	2	1	1	1	3	1	1	0	3	1	1	1	3	0	0	1	1	16
341	2	1	1	2	3	0	2	2	0	2	2	2	0	1	1	3	0	1	0	2	25
342	2	1	1	1	1	1	1	2	1	1	2	2	0	1	1	2	0	1	1	2	26
343	1	2	1	3	2	2	3	3	0	1	2	2	2	3	2	3	1	1	1	2	31
344	0	0	0	3	0	0	2	3	0	0	0	3	1	0	0	3	0	0	0	0	7
345	1	3	2	2	2	1	1	2	0	0	3	2	1	0	0	2	0	1	0	2	25
346	0	1	0	3	1	0	1	2	0	0	1	3	1	0	0	3	0	0	0	0	10
347	0	0	0	3	1	0	1	2	0	0	0	3	0	0	0	3	0	0	0	0	7
349	0	0	0	3	1	1	0	3	0	0	0	3	0	1	0	3	0	1	0	1	9
350	0	2	0	3	1	0	0	2	0	0	1	3	1	0	0	3	0	0	0	0	10
351	0	2	0	3	1	0	1	0	0	0	1	3	1	0	0	3	0	1	0	1	15
352	0	0	0	3	0	2	1	1	3	3	0	3	0	2	0	1	0	2	0	0	21
353	0	0	0	2	1	0	1	2	0	1	1	2	0	1	0	2	0	1	1	2	17
354	0	0	0	3	1	0	1	3	0	0	1	3	0	0	0	3	0	0	0	1	8
355	0	0	0	3	0	0	0	3	0	0	0	3	0	0	0	3	0	0	0	0	4
356	0	0	0	3	1	0	2	3	0	1	2	3	0	0	0	3	0	0	1	0	11
357	0	3	0	2	1	0	1	3	1	1	1	2	1	1	1	3	0	1	2	1	21
358	2	1	3	2	3	1	2	3	0	1	2	1	1	2	0	2	0	1	1	1	29
359	1	0	2	2	1	2	2	2	1	3	3	2	1	1	0	2	3	2	2	2	34
360	1	0	0	0	0	0	0	3	0	0	0	3	0	0	0	3	0	0	0	0	8
361	1	1	1	2	3	2	2	2	0	1	3	1	0	1	1	1	0	0	1	1	28
363	MISSING	DATA																			16
364	0	0	0	1	1	0	0	2	0	0	0	3	0	0	0	3	0	0	0	1	9
366	2	2	3	1	3	3	2	1	1	3	3	1	2	3	1	1	N/A	3	3	3	49
368	1	2	0	2	3	1	2	2	0	2	2	1	2	0	0	2	0	1	0	3	28
369	0	2	0	2	0	1	1	1	1	2	1	2	0	1	0	1	0	2	0	1	22
370	0	0	0	0	0	0	0	0	0	0	0	3	1	0	0	2	0	1	0	0	13
371	0	0	0	2	3	1	1	1	1	0	0	2	2	1	1	2	0	3	2	1	25
372	1	0	0	2	2	1	1	3	0	2	2	3	2	1	0	3	1	1	1	0	20
373	0	0	0	3	2	0	1	3	0	0	1	3	1	0	1	3	0	0	0	1	11
374	1	0	0	3	2	0	1	3	0	0	0	3	1	0	0	2	0	1	0	0	11
375	0	0	0	2	0	0	0	3	0	1	1	3	0	0	0	3	0	0	0	1	8
376	0	1	0	2	0	0	2	2	0	0	0	3	1	1	1	3	0	0	1	0	13
378	1	1	0	3	1	0	1	2	0	1	0	3	0	0	1	3	0	0	1	1	13
379	0	0	0	3	0	0	0	3	1	1	2	2	0	0	0	3	1	1	0	0	11
380	0	2	0	2	0	0	2	3	0	0	1	3	0	1	0	3	0	1	1	1	14
381	1	1	2	0	3	2	2	0	1	0	3	2	0	2	0	2	0	2	2	0	33

## Sheet: Anxiety Inventory
Subject Number	Q1	Q2	Q3	Q4	Q5	Q6	Q7	Q8	Q9	Q10	Q11	Q12	Q13	Q14	Q15	Q16	Q17	Q18	Q19	Q20	Total
116	3	4	2	1	4	1	3	3	1	1	3	2	2	2	3	3	4	2	3	3	40
118	4	3	3	3	3	2	2	3	2	2	3	3	2	2	2	3	3	1	2	3	45
119	4	3	2	1	3	1	2	3	1	1	1	2	2	1	4	3	1	1	3	3	36
121	3	3	1	1	3	1	1	3	1	1	3	1	3	1	3	3	1	1	2	3	35
124	4	3	2	1	3	1	1	4	1	2	2	3	1	1	3	3	1	1	4	4	31
125	3	3	2	1	3	1	2	3	1	1	3	3	2	1	2	3	2	1	3	3	39
126	4	4	2	1	4	1	1	3	2	2	3	3	1	1	3	3	2	1	3	4	32
130	3	2	2	1	2	2	3	2	2	2	3	3	3	2	2	2	1	1	4	3	45
131	2	2	2	2	3	1	1	3	1	1	2	2	1	1	3	3	1	1	3	3	38
132	2	2	4	4	2	1	4	2	2	3	2	4	4	1	2	2	2	1	2	2	56
133	3	3	3	4	2	1	2	2	1	1	2	2	2	1	2	2	3	1	2	3	48
136	3	4	2	2	3	1	1	3	1	2	4	3	1	3	3	4	2	2	4	4	34
137	4	4	1	1	4	1	2	4	1	1	4	1	1	1	4	4	1	1	4	4	24
138	4	4	2	2	2	3	2	2	1	1	3	3	2	3	4	3	1	2	4	4	40
139	3	4	3	1	2	1	1	2	1	1	2	2	3	3	3	4	1	1	3	2	41
140	2	2	2	1	2	2	3	1	1	1	1	1	1	2	2	2	1	1	2	1	49
141	3	4	2	1	3	1	1	3	2	1	3	1	2	1	2	3	2	1	2	3	37
142	3	3	1	1	2	1	2	3	1	1	3	3	1	4	2	2	3	1	3	3	43
143	2	2	3	1	1	2	1	2	1	2	3	2	4	2	1	2	3	4	2	2	54
144	4	4	1	1	4	1	1	3	1	1	1	1	1	1	4	4	1	1	2	4	29
145	3	3	2	2	3	1	2	3	1	2	3	2	1	1	2	3	2	1	2	2	39
146	3	3	1	1	4	1	2	4	1	1	4	2	2	2	4	4	1	1	1	4	32
147	2	2	2	2	3	2	3	2	2	2	3	3	3	3	2	2	3	1	2	2	52
148	4	4	2	2	3	1	1	3	1	1	2	1	1	1	N/A	3	1	1	3	3	#N/A
149	4	4	1	2	4	2	2	4	1	1	4	1	1	3	4	4	3	1	4	4	30
150	4	4	2	1	4	1	2	3	1	1	3	1	1	2	4	4	1	2	3	3	31
151	4	4	2	1	3	1	1	3	1	2	4	2	1	2	4	3	1	2	4	4	29
152	4	4	2	1	3	1	1	3	1	2	4	2	2	1	3	4	1	1	3	4	29
153	4	4	1	1	4	1	1	3	1	1	4	1	3	2	4	4	1	1	3	3	29
155	4	4	1	1	3	1	1	4	1	1	3	1	1	1	4	4	1	1	1	3	29
156	3	3	2	3	2	1	2	2	1	2	3	3	1	2	2	3	2	1	2	3	43
157	4	4	2	1	4	1	2	3	1	1	3	1	1	1	4	4	2	1	3	3	30
158 Poss	3	3	2	2	3	1	1	3	1	2	3	1	2	4	3	3	1	1	3	3	37
159	2	2	3	2	2	1	1	1	1	1	3	1	1	2	1	2	1	2	1	1	49
161	4	3	2	1	4	1	1	4	1	2	2	1	1	1	4	4	1	1	4	4	26
162	4	4	2	1	3	1	1	3	1	1	3	1	2	2	3	3	1	1	3	3	33
163	3	3	3	2	3	1	1	2	3	3	2	4	1	1	3	3	1	1	2	3	41
164	3	4	2	1	3	1	1	4	1	1	4	2	1	1	3	3	1	1	4	3	30
165	4	4	1	1	4	1	2	4	1	1	4	1	1	1	4	4	1	1	4	4	24
167	4	4	1	1	4	1	1	3	1	1	4	1	1	1	4	3	1	1	4	2	27
168	3	3	2	1	2	1	1	2	1	2	1	3	1	1	2	3	1	1	4	2	39
169	4	N/A	1	1	4	1	1	4	1	1	4	2	2	1	4	4	1	1	4	4	#N/A
170	3	3	2	1	3	1	1	2	2	1	3	2	2	1	3	4	1	1	1	4	37
171	4	4	3	2	3	2	2	3	1	1	2	1	1	1	3	3	1	1	4	3	35
172	3	3	2	3	2	1	1	2	1	1	4	2	4	1	2	3	1	1	2	2	43
173	3	3	2	1	3	2	3	2	1	1	3	2	2	1	3	3	1	1	3	3	39
174	4	4	1	1	3	1	1	3	1	1	4	2	1	1	3	3	1	1	3	4	29
175	3	4	3	2	2	1	2	3	3	2	3	4	4	4	2	2	3	1	3	3	50
176	2	2	3	3	2	2	3	3	1	1	3	3	2	2	1	2	3	1	1	3	53
177	3	2	1	1	3	1	1	3	1	3	4	1	1	1	4	1	1	1	3	3	31
178	4	4	1	1	4	1	1	4	1	1	4	1	1	1	4	4	1	1	4	4	23
179	4	3	1	1	4	1	1	3	1	1	2	1	1	1	4	4	1	1	3	3	29
180	4	4	2	1	4	1	1	4	1	1	4	1	2	1	3	4	1	1	4	4	26
181	3	3	2	1	3	1	1	3	1	1	3	1	1	1	4	3	1	1	3	3	32
182	4	3	1	1	4	1	1	3	1	1	3	2	1	1	4	4	1	1	4	3	28
184	4	3	2	1	4	1	2	3	1	2	4	1	1	3	4	4	1	2	4	3	30
185	4	3	3	1	4	2	2	3	1	1	3	3	3	3	4	3	2	2	3	3	41
186	3	3	2	1	1	1	1	3	1	1	1	1	1	1	3	2	1	1	1	3	40
187	3	2	2	2	3	2	3	2	1	2	2	2	2	3	2	1	3	3	2	2	52
188	3	3	2	1	3	1	1	3	1	1	3	2	2	1	3	3	2	1	3	3	36
189	3	3	1	2	3	2	1	2	1	1	4	1	3	1	3	4	2	1	4	4	34
190	2	1	1	1	1	1	3	1	1	4	1	1	1	1	1	1	1	1	1	1	48
191	2	1	1	1	2	1	1	1	2	4	1	2	1	1	2	1	1	1	2	1	45
192	1	1	1	1	1	1	1	1	1	4	2	1	1	1	2	2	2	1	2	1	44
194	2	1	1	2	2	1	2	2	1	4	2	1	1	1	2	2	1	1	3	2	40
195	1	2	1	2	2	1	1	2	1	4	2	1	2	2	2	2	1	1	3	2	41
196	1	1	1	1	1	1	1	1	1	4	1	1	1	1	2	1	1	1	2	2	44
197	2	1	Multiple Responses	2	2	1	Multiple Responses	BLANK	1	4	1	1	1	1	1	1	1	1	1	1	#N/A
198	3	1	2	1	3	2	3	3	1	4	3	2	1	4	3	3	3	3	3	2	44
199	1	1	3	2	2	2	1	2	1	4	2	2	1	1	1	1	1	1	2	2	47
200	3	3	3	4	3	1	2	4	1	4	4	2	2	2	4	4	2	1	4	4	33
201	2	2	1	1	2	1	2	2	1	4	2	1	1	1	2	2	1	1	2	2	39
202	1	1	2	1	2	1	1	2	1	4	3	2	2	3	1	2	1	1	1	2	46
203	2	2	1	1	2	1	1	2	1	4	1	1	1	1	1	2	1	1	4	2	38
204	3	3	3	2	4	2	2	BLANK	2	2	3	4	3	1	3	3	2	1	3	2	#N/A
205	2	2	1	3	2	1	1	3	1	4	2	1	2	1	2	2	1	1	1	1	42
206	1	1	1	1	1	1	1	2	1	4	2	1	2	1	2	4	1	4	4	1	42
207	2	2	3	3	2	1	3	2	1	4	2	2	1	2	3	2	1	2	2	2	46
208	1	1	2	1	1	2	2	2	1	4	3	1	1	1	2	2	1	1	2	1	44
209	1	1	1	1	1	1	1	1	1	4	1	1	1	1	1	1	1	1	1	1	47
209A	2	1	1	1	2	1	1	2	1	4	2	2	1	3	2	2	1	1	1	1	44
210	2	2	1	1	1	1	2	2	1	3	2	2	2	1	2	2	1	1	2	2	43
211	2	1	2	1	2	1	1	1	1	4	2	3	2	1	2	2	1	1	2	2	44
212	2	2	2	3	3	4	3	3	1	4	3	2	2	3	3	4	1	2	4	4	41
213	2	3	1	1	2	1	1	2	1	3	1	1	1	4	1	3	1	1	2	2	42
214	2	2	2	1	2	1	3	2	1	4	1	2	2	2	3	2	1	1	2	2	44
215	1	1	1	1	1	1	1	2	1	4	1	2	2	1	1	2	1	1	3	1	45
215A	1	1	1	1	1	1	2	3	1	4	2	2	1	1	1	2	1	1	2	2	43
216	3	3	3	1	3	1	2	3	1	3	2	4	3	2	3	3	2	1	3	3	41
217	2	1	3	3	3	2	3	3	1	4	2	1	3	2	3	3	3	3	3	3	47
218	1	2	3	1	2	1	1	3	1	4	1	3	2	1	2	2	1	1	2	2	44
219	2	2	3	3	2	3	2	2	2	3	2	3	2	3	2	3	3	3	3	2	54
220	2	2	2	1	2	1	1	1	1	3	2	3	2	2	3	1	1	2	2	2	46
221	2	2	2	1	2	1	1	2	1	4	1	2	1	1	2	2	1	1	2	2	41
222	1	1	1	2	2	1	2	1	1	4	2	1	1	3	2	2	2	1	2	2	46
223	1	1	1	2	2	1	1	3	1	4	3	1	2	1	2	2	1	1	2	3	39
224	2	3	1	1	3	2	3	3	1	4	3	2	1	1	2	3	2	3	4	3	37
225	2	2	1	2	2	2	2	2	1	4	3	1	1	2	4	4	3	2	2	2	40
226	2	2	2	1	2	1	2	2	1	3	3	2	2	1	2	2	1	2	2	2	43
227	1	1	1	1	2	1	2	3	1	3	3	1	2	1	2	2	1	2	1	1	44
228	1	2	2	1	1	1	1	1	1	4	1	2	1	3	1	1	1	2	1	1	51
229	2	1	3	3	4	1	1	2	1	3	2	2	2	1	4	1	1	1	1	2	44
230	2	2	2	2	2	1	2	1	1	4	2	1	2	3	2	2	1	1	3	2	44
231	2	2	2	1	3	BLANK	1	1	1	3	3	2	2	2	3	2	1	1	2	2	40
232	2	2	4	2	2	1	2	2	2	3	2	2	2	1	2	2	1	1	3	2	46
233	3	3	2	1	2	1	1	2	1	4	1	1	2	1	2	1	1	1	2	1	41
234	2	2	3	3	2	2	3	3	1	3	2	1	1	3	2	3	1	1	4	2	44
235	1	1	2	1	1	1	1	2	1	4	1	1	1	1	1	1	1	1	2	2	45
236	2	1	3	1	2	2	3	2	1	4	2	1	2	2	2	2	1	1	2	2	46
237	1	2	2	3	3	1	4	3	1	3	3	1	1	1	2	3	3	1	2	3	43
238	2	2	2	1	2	1	3	1	1	4	2	3	2	2	1	1	2	1	2	2	49
239	2	3	2	1	3	1	1	3	1	3	2	2	1	1	3	3	1	1	3	2	35
240	1	2	1	2	3	1	1	1	1	3	1	2	1	1	2	1	1	2	2	2	45
241	1	1	1	1	1	1	2	2	1	4	3	2	1	1	2	2	1	1	1	1	44
242	1	1	1	1	2	1	1	2	1	4	2	1	1	1	1	2	1	1	2	2	41
243	2	3	3	2	4	1	2	4	3	2	3	3	4	2	4	4	2	3	4	4	41
244	1	1	1	1	1	1	1	1	1	4	1	1	1	1	1	1	1	1	4	1	44
245	2	2	1	1	2	1	2	2	1	4	1	1	1	3	2	2	1	1	2	2	42
246	2	2	1	1	2	1	1	1	1	4	2	1	1	2	2	1	1	2	2	1	43
247	2	2	2	1	2	2	4	3	1	4	3	1	2	1	2	3	1	1	3	3	39
249	1	1	1	1	NaN	1	2	1	1	4	1	2	2	2	2	1	1	1	1	2	#N/A
250	2	1	1	1	2	1	3	BLANK	1	4	2	1	1	1	3	2	1	1	2	2	#N/A
251	2	1	2	2	2	1	1	3	1	4	2	1	1	1	2	1	1	1	2	1	42
252	1	1	1	1	1	1	1	NaN	1	4	1	1	1	1	1	1	1	1	1	3	#N/A
253	2	2	2	4	4	1	3	3	2	3	4	3	3	2	2	4	3	3	4	3	45
254	3	1	1	1	1	2	3	3	1	4	2	2	3	1	3	3	2	2	2	3	43
255	2	1	1	1	2	1	1	1	1	4	3	1	1	1	2	2	1	1	2	2	39
256	1	1	1	1	1	1	2	1	1	4	1	1	1	2	1	1	1	1	1	1	49
257	1	1	2	1	2	1	3	3	1	3	3	2	2	3	2	3	2	3	3	3	46
258	2	2	1	1	3	1	1	2	1	4	2	2	1	1	2	2	1	1	2	2	38
260	1	1	1	1	1	1	1	1	1	4	1	1	1	1	1	1	1	1	1	1	47
261	1	1	2	1	1	1	2	2	1	4	2	2	1	2	3	2	2	2	2	2	46
262	3	2	4	2	2	3	3	3	3	4	3	3	2	2	3	2	3	1	2	3	49
263	1	1	1	1	1	1	1	1	1	4	1	1	1	1	1	2	1	1	2	1	45
264	1	2	3	3	2	3	2	3	1	4	4	1	1	1	3	3	1	2	2	3	41
265	2	2	2	1	3	2	2	2	2	4	2	1	1	1	2	2	2	1	2	2	42
266	2	2	1	1	2	1	1	1	1	4	2	1	2	2	1	1	1	1	1	1	45
267	3	3	3	2	3	1	3	3	1	4	3	2	1	1	3	3	2	1	3	2	37
268	2	2	1	1	3	1	1	2	1	4	2	3	2	1	3	1	1	1	4	2	38
269	DID NOT FILL OUT - NOT IN PACKET																				#N/A
270	2	2	1	1	2	1	1	1	1	4	1	1	1	1	1	1	1	1	1	1	44
271	2	1	1	1	2	2	3	3	1	4	2	1	1	1	2	3	1	2	2	1	42
272	1	2	1	2	2	1	1	3	1	4	3	1	1	2	2	2	1	1	3	3	37
273	3	1	3	2	1	1	1	2	1	3	1	2	3	1	3	1	1	1	3	2	46
274	3	3	1	2	3	1	1	3	2	2	3	1	1	1	3	3	1	2	3	3	34
275	4	4	1	1	4	1	1	4	1	1	4	1	1	1	4	4	1	1	4	4	23
276	2	2	4	3	1	2	3	1	4	3	1	3	3	2	1	1	4	1	2	1	64
277	3	3	2	2	3	1	4	2	2	1	3	3	4	4	3	2	3	1	2	1	53
278	3	3	1	1	2	1	1	3	1	1	3	3	2	2	2	2	1	1	2	2	41
279	4	4	1	1	4	1	3	3	1	1	3	2	1	2	4	3	2	1	4	3	32
280	3	3	2	1	2	1	2	1	2	1	1	3	3	2	2	2	3	1	2	2	51
281	3	4	2	1	3	1	1	3	1	1	3	1	2	1	3	3	1	1	3	3	33
282	3	3	2	1	3	1	1	4	1	1	4	1	1	1	3	3	1	1	4	4	29
283	3	4	2	1	3	1	1	2	1	1	2	2	2	3	2	3	2	2	4	2	41
284	4	4	1	1	4	1	1	4	1	1	4	1	1	1	4	4	1	1	4	4	23
285	4	4	1	1	3	1	1	3	1	1	3	2	1	2	3	4	2	1	3	3	32
286	4	4	1	1	3	1	4	1	2	2	3	1	1	1	4	3	1	1	3	3	34
287	4	4	1	1	3	1	2	3	1	1	3	1	1	1	4	3	1	1	3	3	30
288	4	4	1	1	4	1	2	4	1	1	4	2	1	3	4	4	2	1	4	4	28
289	2	1	3	1	1	2	2	1	1	2	1	3	1	2	2	1	2	1	2	1	54
290	4	4	2	1	4	1	1	4	1	1	3	2	2	1	4	4	2	1	4	4	28
291	3	3	3	3	3	1	1	4	1	2	4	1	1	1	2	4	1	2	3	4	33
292	3	3	3	1	3	1	1	3	1	1	2	3	2	3	2	3	2	2	3	3	43
293	4	3	1	2	4	1	1	3	1	1	2	1	1	2	3	3	1	1	3	3	33
294	3	4	2	1	3	1	1	4	1	1	4	2	2	2	3	4	1	1	4	4	30
295	3	3	3	3	3	1	2	2	1	1	2	1	1	1	2	2	1	1	2	2	43
296	3	2	2	1	2	2	2	2	1	2	2	2	1	2	3	3	2	1	2	2	43
297	4	3	1	1	4	1	2	1	1	1	2	3	1	1	4	4	2	1	3	3	35
298	2	3	2	1	2	3	4	2	1	2	1	3	3	1	2	2	3	2	1	1	55
299	4	4	2	1	4	1	1	2	1	1	4	1	1	3	4	3	1	1	3	3	31
300	2	2	2	2	2	1	3	2	1	2	1	3	2	2	2	2	2	3	2	2	52
301	3	3	3	2	3	1	2	3	2	2	3	3	3	1	3	2	2	1	3	3	42
302	4	4	1	1	4	1	2	3	1	1	2	2	1	2	3	3	1	1	3	3	33
303	4	3	2	1	4	1	2	3	2	1	4	2	1	2	3	4	2	2	3	3	35
304	4	4	1	2	4	1	2	3	1	1	2	1	1	1	4	4	2	2	3	2	33
305	4	3	4	3	2	2	3	3	1	1	3	1	1	1	2	3	1	1	1	2	44
306	2	3	2	1	3	1	2	4	1	2	4	2	2	1	3	3	1	1	3	4	33
307	3	2	2	1	2	1	2	3	1	1	2	2	3	1	2	2	1	1	1	2	45
308	4	4	1	1	4	2	2	4	1	1	4	1	1	2	4	4	1	1	4	4	26
309	4	4	2	1	3	1	1	2	1	1	4	2	1	1	3	2	1	1	3	2	34
310	2	3	2	1	3	1	1	3	1	2	3	2	1	1	2	3	2	1	2	2	38
311	4	4	1	1	3	1	1	3	1	1	3	1	2	1	3	3	1	1	3	3	31
312	4	4	1	1	4	1	2	4	1	1	4	2	1	1	4	4	1	1	4	4	25
313	4	3	2	1	3	1	2	2	1	3	3	2	1	1	2	2	3	1	3	3	37
314	3	3	3	2	3	1	3	2	1	1	3	2	1	1	3	3	3	1	2	3	42
315	2	2	3	3	2	4	3	3	2	3	2	3	2	1	2	2	3	3	2	2	55
316	3	3	2	1	4	1	1	3	1	2	2	1	1	1	4	3	2	1	4	3	31
317	4	3	1	2	2	1	3	2	1	1	3	2	3	3	3	3	3	2	3	2	45
318	4	3	1	2	4	1	2	3	1	1	3	1	1	2	3	3	1	1	3	3	33
319	2	2	3	3	1	1	1	2	3	3	2	3	1	1	2	1	2	1	2	1	51
320	4	4	1	3	4	1	3	2	1	1	3	1	1	1	4	2	1	1	4	2	34
321	3	3	2	2	3	1	1	3	1	1	4	1	2	1	2	3	1	1	3	3	35
322	2	3	3	2	2	1	3	2	1	1	3	2	2	2	3	3	2	1	3	3	44
324	2	2	3	2	2	1	2	2	1	1	2	1	1	2	2	2	1	1	3	2	45
325	4	4	1	1	2	1	1	3	1	1	3	1	2	1	3	4	1	2	4	4	30
326	4	4	1	1	4	1	1	4	1	1	3	1	1	1	4	4	1	1	4	4	24
328	3	2	3	1	2	1	2	3	1	1	1	2	2	1	2	4	3	1	2	3	44
329	4	4	2	1	4	1	3	2	2	2	3	1	1	4	3	2	3	1	3	2	40
330	4	3	1	1	3	1	2	3	1	1	3	1	2	2	3	3	1	1	2	3	35
331	2	2	3	2	2	1	2	3	1	1	3	1	2	1	2	2	3	1	4	3	43
332	3	2	2	2	2	2	3	2	2	3	2	3	2	2	2	2	3	1	3	2	49
333	4	4	3	1	3	1	1	2	1	1	2	2	2	1	3	2	1	1	3	4	36
334	4	4	2	1	4	2	3	4	1	1	3	2	1	1	3	4	2	1	4	4	31
335	4	4	2	1	4	1	1	4	1	1	3	1	1	1	3	4	1	1	3	4	27
336	3	2	3	3	2	1	2	2	2	1	3	2	1	1	2	3	1	1	2	3	44
337	4	3	1	1	4	1	1	3	1	2	2	1	1	1	4	4	1	1	4	3	27
338	4	4	1	1	4	1	1	4	1	1	4	1	1	1	4	4	1	1	4	4	23
339	3	2	3	3	2	2	1	2	1	1	2	1	2	3	2	3	1	1	3	4	44
340	4	4	1	1	4	1	1	3	1	4	4	1	1	1	4	4	1	1	4	4	21
341	3	3	3	3	3	2	3	3	1	1	3	2	1	3	3	3	1	1	3	3	42
342	2	3	2	3	2	2	3	2	1	2	2	2	3	3	2	2	2	2	1	2	53
343	2	4	3	4	3	3	3	4	2	2	3	2	1	2	3	3	3	2	4	3	44
344	4	4	1	1	4	1	1	4	1	1	4	2	1	1	4	4	1	1	4	4	24
345	4	4	2	1	4	1	2	3	1	1	3	1	1	1	4	4	1	1	3	3	29
346	3	3	1	1	4	1	2	3	1	1	4	1	2	1	3	4	1	1	4	4	29
347	3	4	1	1	3	1	1	3	1	1	3	1	1	1	3	3	1	1	3	4	30
349	4	3	1	3	3	1	4	4	1	1	4	1	1	1	4	4	1	1	4	4	30
350	4	4	1	1	4	1	2	3	1	1	3	1	1	2	4	4	1	1	4	3	28
351	4	4	1	2	4	1	2	3	1	1	4	1	1	1	4	4	1	1	3	4	27
352	3	2	2	4	2	1	3	1	2	1	2	3	1	2	2	1	4	2	2	3	55
353	1	3	3	2	2	1	4	2	2	1	2	3	1	2	1	3	3	1	3	3	51
354	4	4	1	2	4	2	2	4	1	1	4	2	1	2	4	4	2	1	4	4	29
355	4	4	2	1	3	1	1	4	1	1	3	1	1	1	3	4	1	1	3	3	29
356	4	3	1	1	4	1	1	3	1	1	3	1	1	2	4	3	1	1	3	3	30
357	4	3	2	2	4	1	2	4	2	4	3	2	2	3	4	4	1	1	4	3	31
358	3	3	2	1	2	1	3	2	1	1	2	2	2	2	3	3	2	1	2	2	44
359	3	3	2	2	2	1	3	2	3	1	3	3	2	1	2	2	2	1	2	2	48
360	4	4	1	1	3	1	1	2	1	1	4	1	1	1	2	2	1	1	3	4	31
361	4	1	2	2	3	1	1	2	1	3	1	1	2	1	3	2	2	2	2	1	43
363	MISSING	DATA																			#N/A
364	4	4	1	1	4	1	1	3	1	1	4	1	1	1	4	4	1	1	4	4	24
366	2	2	3	3	1	4	4	2	2	4	2	4	4	3	1	2	4	4	2	2	65
368	4	4	4	2	4	1	2	2	1	1	2	1	1	1	2	1	2	1	2	2	42
369	3	3	2	3	3	1	2	1	1	1	1	1	1	1	3	2	1	1	1	2	44
370	4	4	2	2	4	1	2	3	1	1	4	2	1	1	4	4	1	1	3	4	29
371	4	4	1	1	4	1	2	1	1	1	2	1	1	2	4	2	1	1	3	2	35
372	3	3	3	2	3	1	4	3	2	2	3	3	1	3	3	3	2	1	3	3	43
373	4	4	1	2	3	1	1	3	1	1	4	1	1	1	4	4	1	2	4	4	27
374	3	4	2	2	3	1	2	4	1	1	3	1	1	1	3	3	1	1	3	3	33
375	4	4	1	1	3	1	1	3	1	1	3	2	2	1	3	3	1	1	3	3	32
376	4	4	1	1	4	1	1	3	1	1	4	1	1	1	2	3	1	1	3	4	28
378	4	4	1	2	4	1	1	3	1	1	3	1	1	1	3	4	1	1	2	3
379	4	4	1	1	4	1	1	4	1	1	3	1	1	1	4	4	1	1	3	3
380	4	4	1	1	3	1	1	3	1	1	4	2	2	1	4	4	1	1	4	3
381	3	3	3	2	3	1	3	2	1	2	1	3	2	3	1	1	2	1	2	1

## Sheet: Positive and Negative Affect
Subject Number	Q1	Q2	Q3	Q4	Q5	Q6	Q7	Q8	Q9	Q10	Q11	Q12	Q13	Q14	Q15	Q16	Q17	Q18	Q19	Q20	Positive Affect	Negative Affect
116	4	1	4	1	5	1	2	1	4	3	1	4	1	2	2	4	4	2	3	2	37	14
118	4	2	2	1	3	2	2	1	3	4	3	3	1	4	4	4	2	2	2	1	31	19
119	5	1	4	1	4	4	1	1	3	2	1	5	4	5	2	4	4	2	2	1	38	18
121	4	1	4	1	3	1	1	1	5	5	1	4	1	3	1	4	4	3	3	1	39	12
124	4	1	3	1	3	1	1	1	2	1	1	4	1	3	2	4	4	1	5	1	33	11
125	4	1	2	1	3	1	1	1	3	2	2	4	1	1	2	5	3	2	2	1	29	13
126	4	2	5	1	4	1	2	1	4	3	1	2	1	1	2	1	3	1	3	2	30	14
130	4	3	3	2	2	1	1	1	3	2	3	4	1	3	3	3	3	2	2	2	29	19
131	4	1	3	1	3	1	1	1	3	3	1	2	1	3	2	3	4	1	3	1	31	11
132	3	2	2	1	1	2	2	1	2	1	2	2	1	1	4	2	2	3	1	1	17	19
133	3	1	2	1	2	1	1	2	2	2	3	2	1	1	1	2	2	2	1	1	19	14
136	5	3	3	1	4	1	2	1	4	3	2	2	1	3	2	3	4	1	4	1	35	15
137	5	1	3	1	3	1	1	1	4	4	1	5	1	3	1	5	3	1	5	1	40	10
138	2	3	4	2	3	1	1	1	4	5	2	3	1	3	1	3	4	2	4	1	35	15
139	3	1	3	1	3	2	2	1	4	1	1	2	1	3	1	1	3	3	3	1	26	14
140	3	1	2	1	1	3	1	1	1	1	1	1	1	1	2	2	2	1	1	2	15	14
141	4	1	4	1	3	1	1	1	3	3	1	4	1	4	2	3	4	3	4	1	36	13
142	4	1	4	1	2	1	1	1	3	1	1	4	1	3	4	4	4	3	4	1	33	15
143	4	2	3	1	2	1	1	1	4	3	2	2	1	3	3	2	2	4	2	1	27	17
144	4	1	3	1	4	1	1	1	4	2	1	3	1	2	1	2	3	1	3	1	30	10
145	2	3	2	3	4	1	2	1	2	2	1	3	1	3	2	3	2	1	4	2	27	17
146	4	1	3	1	4	1	1	1	3	3	1	2	1	2	1	3	3	1	1	1	28	10
147	4	3	2	2	4	2	4	1	2	2	1	2	2	1	4	2	2	3	2	4	23	26
148	3	1	2	1	3	1	1	1	3	2	1	4	1	1	1	2	3	1	1	1	24	10
149	5	2	5	2	5	2	1	1	5	4	1	4	1	5	2	5	4	1	5	1	47	14
150	4	1	3	1	3	2	1	1	2	2	2	3	1	3	1	4	3	1	2	1	29	12
151	4	1	4	1	3	1	1	1	2	2	1	4	1	3	2	4	4	1	5	1	35	11
152	3	1	2	1	3	1	1	1	2	3	1	4	1	3	2	4	4	2	3	1	31	12
153	5	1	5	1	4	1	1	1	5	5	2	4	1	1	1	2	4	4	5	1	40	14
155	4	4	4	1	4	1	1	1	3	3	1	3	1	1	1	2	4	1	2	1	30	13
156	4	3	4	1	3	1	1	1	4	4	2	2	1	3	3	4	2	1	2	1	32	15
157	4	1	2	1	2	1	1	1	1	1	3	3	1	1	1	2	3	1	1	1	20	12
158	2	1	1	1	1	1	1	1	1	1	2	3	1	1	1	1	1	2	2	1	14	12
159	3	1	1	2	2	1	1	1	2	1	1	3	1	2	1	2	4	1	3	1	23	11
161	4	1	2	1	3	1	1	1	2	2	1	4	1	1	2	1	3	1	2	1	24	11
162	4	1	3	1	3	1	1	1	2	2	1	2	1	2	1	3	4	2	3	1	28	11
163	4	2	4	1	1	1	2	1	3	1	1	3	1	1	4	4	4	1	1	1	26	15
164	3	1	1	1	3	1	1	1	1	1	1	1	1	1	3	1	4	1	1	1	17	12
165	5	1	4	1	4	1	1	1	3	3	1	3	1	3	1	4	3	1	3	1	35	10
167	2	1	1	1	1	1	1	1	1	1	1	1	1	1	1	1	1	1	1	1	11	10
168	4	1	2	1	1	1	1	1	2	1	1	4	2	2	1	1	3	1	2	1	22	11
169	4	1	4	1	5	1	1	1	5	4	1	4	1	4	2	5	4	1	5	1	44	11
170	4	1	4	1	3	1	1	1	2	2	1	2	1	1	2	3	1	2	3	1	25	12
171	4	1	3	1	2	1	1	1	3	3	1	4	1	2	1	2	3	1	3	1	29	10
172	4	2	2	1	3	1	1	1	2	2	1	3	1	2	2	2	3	4	2	1	25	15
173	5	1	4	2	4	1	1	1	3	3	1	3	1	3	1	3	4	2	3	1	35	12
174	4	1	4	1	3	2	1	1	5	4	2	4	1	3	2	4	3	1	5	2	39	14
175	4	3	4	1	5	2	4	1	2	5	2	5	2	1	5	4	5	5	2	4	37	29
176	5	3	2	1	4	1	2	1	3	3	1	4	2	3	3	4	3	2	2	1	33	17
177	4	1	2	1	2	1	1	1	1	1	1	1	1	1	1	1	2	1	1	1	16	10
178	3	1	2	1	4	1	1	1	2	4	1	4	1	1	1	3	5	1	3	1	31	10
179	3	1	1	1	1	1	1	1	1	1	1	1	1	1	1	2	3	1	2	1	16	10
180	4	1	2	1	4	2	1	2	3	4	1	5	1	4	1	5	4	1	5	1	40	12
181	5	1	4	1	3	1	1	1	4	1	1	3	1	1	2	1	4	1	1	1	27	11
182	5	1	2	1	4	1	1	1	1	1	1	3	1	1	2	1	3	1	3	1	24	11
184	3	1	2	1	2	1	1	1	3	2	1	3	1	2	1	2	3	2	1	1	23	11
185	3	1	1	3	3	1	1	1	1	1	2	1	1	1	1	2	3	2	1	1	17	14
186	4	3	4	1	3	1	1	1	3	3	2	4	1	4	1	4	4	1	5	1	38	13
187	4	2	3	3	3	4	3	2	2	3	3	4	3	5	3	3	3	3	4	3	34	29
188	4	1	3	1	3	1	1	1	3	2	1	2	1	2	2	2	3	2	3	1	27	12
189	5	3	3	3	5	5	1	1	2	2	1	5	3	3	1	5	5	5	5	1	40	24
190	4	1	4	1	4	1	1	1	4	4	1	4	1	4	2	4	4	1	3	1	39	11
191	4	1	4	1	5	2	1	1	4	5	1	3	1	5	2	5	4	2	3	1	42	13
192	4	2	3	2	4	1	1	1	4	4	1	4	1	3	2	4	4	1	3	1	37	13
194	3	2	2	1	3	4	1	1	2	2	1	3	2	1	1	2	3	1	1	1	22	15
195	3	1	4	1	3	1	1	1	3	2	1	2	1	3	2	2	2	1	3	1	27	11
196	3	1	2	1	3	1	1	1	2	4	1	4	1	2	1	3	4	3	3	1	30	12
197	4	2	3	1	2	1	1	1	3	3	1	4	1	3	1	4	4	1	1	1	31	11
198	3	2	2	2	2	1	1	1	2	2	3	1	1	2	3	2	2	1	2	1	20	16
199	4	3	3	2	3	1	1	1	3	3	2	3	1	3	2	3	3	1	3	1	31	15
200	2	5	1	2	1	2	1	2	1	1	4	1	1	2	2	2	1	2	1	1	13	22
201	3	1	3	1	3	1	1	1	2	2	1	2	1	1	1	1	3	2	3	1	23	11
202	3	1	2	1	2	1	2	1	3	3	1	3	1	2	2	2	2	2	4	1	26	13
203	3	1	1	1	3	1	1	1	2	2	1	3	1	3	1	4	3	1	3	1	27	10
204	4	2	3	1	2	2	3	1	2	3	1	5	2	1	4	4	4	2	4	2	32	20
205	4	1	4	1	4	1	1	1	5	4	1	5	1	1	2	1	4	2	4	1	36	12
206	5	1	3	1	2	1	1	1	4	3	1	1	1	1	1	4	5	2	4	1	32	11
207	4	2	3	1	2	1	1	1	3	3	1	5	1	3	2	5	5	1	2	1	35	12
208	5	1	3	1	3	1	1	1	4	3	2	4	1	3	1	3	4	1	4	1	36	11
209	3	1	2	1	3	1	1	1	3	4	1	5	1	2	1	5	5	2	3	1	35	11
209A	4	1	3	1	2	1	1	1	3	4	1	4	1	4	2	3	5	1	3	1	35	11
210	3	1	BLANK	2	4	1	1	1	3	3	2	4	1	5	2	4	3	1	2	1	31	13
211	4	1	3	1	3	1	1	1	2	3	2	4	1	2	2	3	4	2	2	1	30	13
212	3	4	2	4	1	1	1	1	2	1	5	3	4	2	4	3	3	5	1	1	21	30
213	3	1	2	1	2	1	1	1	2	3	1	4	1	3	1	3	4	1	4	1	30	10
214	4	1	1	1	1	1	1	1	1	1	1	1	1	1	1	1	2	2	1	1	14	11
215	4	1	4	1	4	1	1	1	4	3	1	5	1	3	2	4	5	2	4	1	40	12
215A	4	1	2	1	1	1	2	1	2	1	1	1	1	3	2	3	5	1	1	1	23	12
216	4	2	3	1	2	1	1	1	2	2	1	4	1	2	4	2	3	3	2	1	26	16
217	3	3	2	2	1	3	3	1	2	2	4	2	2	3	3	3	2	3	2	2	22	26
218	4	1	3	1	2	1	2	1	2	3	1	4	1	2	3	4	4	2	2	1	30	14
219	4	4	3	3	3	2	2	2	3	2	1	3	1	3	4	4	4	2	3	1	32	22
220	4	2	4	1	3	1	1	1	3	2	1	3	1	2	2	2	3	2	3	1	29	13
221	4	1	3	1	4	1	1	1	3	2	1	2	1	3	1	3	3	1	4	1	31	10
222	3	2	3	1	3	1	1	1	2	5	2	4	1	3	1	3	4	1	2	1	32	12
223	4	1	4	1	2	1	1	1	3	1	1	2	1	3	1	2	3	2	4	1	28	11
224	4	2	3	2	4	1	1	1	2	2	1	4	1	3	2	5	5	1	4	1	36	13
225	1	2	1	3	3	1	1	1	1	2	1	3	1	2	1	1	2	1	2	1	18	13
226	4	2	4	2	3	1	2	1	3	2	1	3	1	3	1	3	3	2	3	1	31	14
227	4	2	3	1	3	1	2	1	3	3	1	2	1	2	2	3	5	1	3	1	31	13
228	5	2	4	1	4	1	3	1	4	5	1	5	1	5	3	1	4	1	4	1	41	15
229	5	2	3	1	3	1	1	2	2	2	2	5	1	2	2	4	5	2	2	1	33	15
230	4	2	3	1	4	1	1	1	3	3	1	2	1	3	1	3	3	4	4	1	32	14
231	4	1	3	1	5	1	1	1	1	3	1	4	1	4	3	4	3	3	1	1	32	14
232	4	2	4	1	3	1	2	1	3	2	2	4	1	1	3	4	4	2	2	1	31	16
233	5	1	4	1	5	1	1	1	4	5	1	5	1	5	1	5	5	2	4	1	47	11
234	4	1	4	2	3	1	0	1	3	2	1	4	0	3	2	5	3	2	3	0	34	10
235	3	1	3	1	4	1	1	1	3	2	1	5	1	2	1	3	5	1	3	1	33	10
236	4	1	4	1	1	1	1	1	3	2	1	3	1	1	1	3	3	4	2	1	26	13
237	2	4	1	4	2	1	1	3	1	1	3	3	1	1	1	3	3	1	2	1	19	20
238	3	1	3	1	2	1	1	1	2	2	1	2	1	3	3	2	2	2	1	1	22	13
239	3	1	2	2	2	1	1	1	3	3	1	3	1	1	2	1	2	1	1	1	21	12
240	2	4	4	1	1	1	1	1	2	3	1	1	1	2	2	4	1	1	2	1	22	14
241	4	1	4	1	4	1	1	1	4	4	1	5	1	3	3	4	5	1	3	1	40	12
242	4	1	2	1	2	1	1	1	3	1	1	2	1	1	1	1	2	1	2	1	20	10
243	4	4	2	1	2	1	4	1	2	2	1	5	1	2	4	2	5	4	2	3	28	24
244	2	1	2	1	3	1	1	1	4	4	1	5	1	2	1	4	5	1	3	1	34	10
245	4	1	3	1	3	1	1	1	3	2	1	2	1	3	1	3	3	1	3	1	29	10
246	4	1	3	1	3	1	1	1	3	3	1	2	1	3	1	3	4	1	3	1	31	10
247	3	2	1	1	1	1	1	1	1	2	2	3	2	1	1	2	2	2	1	1	17	14
249	4	1	4	1	4	1	1	1	4	4	1	3	1	2	2	3	3	2	4	1	35	12
250	3	1	2	1	4	1	1	1	3	3	1	4	1	2	1	2	3	1	3	1	29	10
251	3	1	4	1	2	2	1	1	2	1	2	3	1	2	1	2	2	1	1	1	22	12
252	3	1	2	1	4	1	1	1	3	4	1	3	1	1	1	1	1	1	1	1	23	10
253	2	2	3	2	1	2	3	1	1	3	2	3	2	1	3	2	2	3	1	4	19	24
254	4	2	3	2	4	1	1	1	2	2	1	4	1	2	2	3	3	4	4	1	31	16
255	5	2	4	1	2	1	1	1	3	2	1	3	1	2	1	2	4	2	2	1	29	12
256	4	1	3	1	4	1	1	1	3	3	1	3	1	4	1	3	3	1	3	1	33	10
257	3	2	1	1	2	1	1	1	1	1	1	1	1	1	2	1	3	4	2	1	16	15
258	4	1	3	1	3	1	1	1	3	3	1	3	1	3	1	2	3	1	4	1	31	10
260	5	1	5	1	5	1	1	1	3	3	1	4	1	4	1	4	5	1	4	1	42	10
261	4	1	2	1	2	1	1	1	2	1	1	2	1	1	2	2	3	2	2	1	21	12
262	3	2	3	3	3	1	1	1	3	2	2	4	2	3	3	3	3	4	2	2	29	21
263	3	1	2	1	4	1	1	1	2	3	1	3	1	2	1	2	3	1	5	1	29	10
264	2	3	1	3	2	1	1	1	1	1	4	1	1	1	2	2	2	2	2	2	15	20
265	3	1	3	1	3	1	1	1	2	3	1	2	1	2	1	2	3	1	3	1	26	10
266	3	1	3	1	2	1	1	1	2	2	1	1	1	3	1	3	2	1	3	1	24	10
267	4	2	3	0	2	0	0	0	1	2	0	2	0	2	1	3	2	0	1	0	22	3
268	4	1	3	1	3	1	1	1	2	1	1	3	1	1	3	1	3	1	2	1	23	12
269	DID NOT FILL OUT - NOT IN PACKET																				0	0
270	4	1	3	1	3	1	1	1	4	3	1	3	1	3	1	3	3	1	4	1	33	10
271	3	3	2	1	4	1	1	1	2	2	2	2	1	3	1	3	1	1	1	1	23	13
272	3	1	2	1	3	1	1	1	2	1	1	3	1	2	1	4	3	1	2	1	25	10
273	2	3	1	2	3	1	1	1	1	1	4	3	1	1	2	2	3	3	1	1	18	19
274	4	1	3	1	1	1	2	1	3	1	1	1	1	1	1	1	3	1	3	1	21	11
275	4	1	4	1	5	1	1	1	4	4	1	4	1	4	1	5	4	1	3	1	41	10
276	4	3	3	2	2	3	3	1	2	2	1	3	2	2	4	2	3	4	2	3	25	26
277	5	3	4	1	4	3	1	1	4	4	2	4	2	4	4	4	4	4	3	2	40	23
278	3	1	2	1	2	1	1	1	3	2	1	2	1	1	2	3	3	1	1	2	22	12
279	5	1	4	1	3	2	2	1	4	1	1	3	2	4	2	4	4	1	3	2	35	15
280	5	2	4	2	2	1	2	1	4	1	1	1	1	2	3	2	2	3	2	2	25	18
281	4	1	3	1	3	1	1	1	3	4	1	3	1	2	1	3	4	2	5	1	34	11
282	4	1	2	1	5	1	1	1	3	3	1	3	1	3	1	5	5	1	4	1	37	10
283	5	1	4	1	2	1	2	1	4	2	1	3	1	2	2	3	3	3	2	1	30	14
284	4	1	4	1	5	1	1	1	5	4	1	4	1	4	1	4	5	1	5	1	44	10
285	4	2	2	1	3	2	1	1	3	3	1	2	1	3	2	4	3	1	3	1	30	13
286	5	1	2	1	3	1	1	1	3	3	2	4	1	1	2	1	4	1	2	1	28	12
287	4	1	3	1	4	1	1	1	3	1	1	4	1	3	1	4	5	1	4	1	35	10
288	4	1	3	1	5	1	1	1	4	5	1	5	1	4	1	5	5	2	5	1	45	11
289	2	3	2	2	1	2	1	1	1	1	2	2	2	1	4	1	3	1	1	1	15	19
290	3	2	3	1	3	1	1	1	3	2	1	3	1	1	2	3	3	1	3	1	27	12
291	5	2	4	1	4	1	1	1	3	3	1	4	1	3	1	3	3	2	4	1	36	12
292	4	1	2	1	3	1	1	1	3	1	1	2	1	2	3	3	2	2	2	1	24	13
293	3	1	1	1	3	3	1	1	1	3	2	4	1	2	1	3	4	1	4	1	28	13
294	4	1	3	1	3	1	1	1	3	5	1	3	1	4	1	3	4	1	5	1	37	10
295	3	1	2	0	2	0	0	0	2	3	1	4	0	3	0	2	2	0	1	0	24	2
296	3	2	2	1	2	2	1	1	1	2	2	3	1	1	2	2	2	1	2	1	20	14
297	5	1	4	1	3	1	1	1	3	2	2	3	1	2	3	4	3	2	3	1	32	14
298	2	3	2	3	1	1	4	1	1	2	1	1	2	2	3	2	1	4	2	4	16	26
299	3	1	3	1	4	1	1	1	3	3	1	4	1	4	1	4	3	1	5	1	36	10
300	3	2	3	1	1	1	1	1	2	2	1	3	1	3	2	2	3	2	2	1	24	13
301	4	2	3	1	3	1	3	1	4	3	2	4	2	3	3	3	3	4	3	3	33	22
302	4	1	2	1	1	1	1	1	2	1	1	3	1	1	1	2	3	1	2	1	21	10
303	5	3	5	2	4	1	2	1	4	5	3	4	1	5	2	4	4	1	5	1	45	17
304	4	1	2	1	3	1	2	1	3	3	1	2	1	1	2	1	1	1	1	1	21	12
305	3	1	2	2	3	1	1	2	4	4	2	4	1	4	2	4	4	1	4	1	36	14
306	5	1	4	1	4	1	1	1	3	3	1	4	1	3	2	4	4	2	4	1	38	12
307	3	1	2	1	2	1	1	1	3	2	1	3	1	2	2	3	3	2	2	1	25	12
308	4	1	4	1	4	1	1	1	3	4	1	3	1	2	1	3	3	1	3	1	33	10
309	5	1	3	1	4	1	1	1	3	3	1	4	1	3	2	4	4	1	3	1	36	11
310	3	2	3	1	4	1	1	1	3	3	1	3	1	2	2	2	2	1	3	1	28	12
311	3	1	2	1	2	1	1	1	3	2	1	1	1	2	1	1	2	3	2	1	20	12
312	4	1	2	1	3	1	1	1	3	4	1	3	1	4	1	5	4	1	3	1	35	10
313	4	2	3	1	3	1	2	1	3	3	1	4	1	1	2	3	4	1	3	1	31	13
314	3	2	1	2	2	1	2	1	3	2	2	1	2	2	3	2	2	1	2	1	20	17
315	3	4	2	2	2	1	2	1	1	2	3	1	1	1	2	1	1	2	1	2	15	20
316	4	1	2	1	3	1	1	1	2	2	1	4	1	1	2	3	4	1	3	1	28	11
317	3	1	1	1	4	3	1	1	2	2	2	4	5	4	1	3	3	2	2	1	28	18
318	2	1	4	2	5	1	1	1	3	3	1	1	1	2	1	3	1	1	3	1	27	11
319	4	3	1	1	1	1	2	1	1	1	1	2	1	1	3	1	2	1	1	1	15	15
320	3	2	3	1	4	2	1	1	3	2	1	4	2	1	1	2	4	1	3	1	29	13
321	3	1	1	1	3	1	1	1	2	2	1	3	1	3	1	4	3	2	2	1	26	11
322	4	3	3	1	3	1	1	2	4	3	1	4	1	2	1	2	3	2	1	1	29	14
324	1	2	1	1	1	1	1	1	1	1	2	1	1	1	1	1	1	1	1	1	10	12
325	4	2	3	1	3	1	1	1	3	3	1	5	1	3	2	4	4	2	4	1	36	13
326	4	1	2	1	4	1	1	1	3	2	1	3	1	3	1	3	4	1	4	1	32	10
328	3	4	1	1	3	1	2	1	1	1	2	3	1	1	2	2	4	4	3	2	22	20
329	3	2	2	1	2	1	1	1	3	1	2	2	1	2	3	2	2	1	3	1	22	14
330	3	1	2	1	3	2	1	1	2	2	1	2	1	2	1	3	2	2	2	1	23	12
331	3	2	3	1	3	1	1	1	1	1	1	3	1	1	1	1	1	3	3	1	20	13
332	4	2	3	1	3	1	2	1	1	2	2	4	1	1	3	4	4	1	2	2	28	16
333	4	1	3	1	3	1	1	1	3	2	2	4	1	2	2	3	4	1	2	1	30	12
334	4	3	4	2	5	3	2	1	4	4	3	3	1	4	2	4	4	1	4	1	40	19
335	5	1	4	1	4	1	1	1	4	4	1	3	1	3	1	4	4	1	4	1	39	10
336	4	2	3	1	4	1	1	1	4	3	1	3	1	3	1	2	4	1	3	1	33	11
337	4	1	2	1	4	1	1	1	2	1	1	5	1	1	1	5	5	1	4	1	33	10
338	5	1	5	1	5	1	1	1	5	4	1	5	1	4	1	4	4	1	5	1	46	10
339	5	1	5	1	3	1	1	1	3	2	1	4	1	3	1	3	3	1	1	1	32	10
340	5	1	4	1	4	1	1	1	4	3	1	4	1	3	1	4	4	1	4	1	39	10
341	4	3	3	2	4	1	1	1	3	3	3	2	1	2	2	4	2	1	4	1	31	16
342	2	2	1	2	3	1	1	1	3	3	4	4	2	1	2	3	3	4	3	1	26	20
343	5	3	5	3	5	1	2	3	5	5	4	3	1	5	3	5	1	3	4	1	43	24
344	4	1	3	1	4	1	1	1	4	4	1	4	1	2	2	4	4	1	3	1	36	11
345	5	1	4	1	3	1	1	1	2	4	1	5	1	2	1	3	4	1	4	1	36	10
346	2	1	4	1	3	1	1	1	4	5	1	3	1	3	1	3	4	2	4	1	35	11
347	3	1	2	1	2	1	1	1	4	4	2	3	1	2	1	4	3	1	3	1	30	11
349	4	1	2	1	5	1	1	1	?	5	2	3	1	1	2	5	5	1	4	1	34	12
350	3	1	2	1	2	1	1	1	2	2	2	2	1	2	1	2	3	1	1	1	21	11
351	3	2	3	1	4	2	1	1	3	2	1	3	1	1	1	3	3	1	2	1	27	12
352	3	4	2	1	2	4	3	1	3	2	1	2	4	2	3	3	3	1	3	5	25	27
353	3	1	2	1	1	1	2	1	2	1	3	2	3	1	4	3	2	3	N/A	2	17	21
354	4	1	4	1	4	1	1	1	4	4	2	4	1	4	2	4	4	1	5	1	41	12
355	4	1	4	1	4	1	1	1	5	3	1	4	1	4	1	3	3	1	2	1	36	10
356	4	1	3	1	3	2	1	1	3	2	1	3	1	3	1	2	3	1	2	1	28	11
357	4	1	3	2	4	1	2	1	3	3	2	4	1	3	2	3	4	2	3	1	34	15
358	3	1	1	1	1	1	1	1	2	2	3	3	1	2	2	3	3	3	3	1	23	15
359	3	2	3	1	2	1	2	1	2	2	2	3	2	2	3	2	2	4	3	1	24	19
360	2	1	2	1	3	1	1	1	3	3	1	2	1	3	1	3	2	1	1	1	24	10
361	1	1	1	1	1	2	1	1	1	1	3	2	2	3	1	1	1	2	1	1	13	15
363	MISSING	DATA																			0	0
364	2	1	2	1	3	1	1	1	4	4	1	3	1	2	1	3	3	1	2	1	28	10
366	1	4	1	4	2	3	3	4	1	2	4	2	2	1	4	2	2	2	2	4	16	34
368	3	4	2	1	3	1	1	1	2	2	1	1	1	1	1	3	1	1	3	1	21	13
369	3	1	2	1	1	1	1	1	2	1	1	1	1	1	1	2	1	1	2	1	16	10
370	3	1	2	1	4	1	1	1	2	3	2	2	1	3	1	4	3	1	2	1	28	11
371	2	1	1	1	1	1	1	1	1	1	1	1	1	1	1	1	3	1	2	1	14	10
372	4	2	3	1	3	1	2	1	2	3	1	4	1	2	3	3	3	1	2	1	29	14
373	2	1	2	1	3	1	1	1	2	1	1	3	1	1	1	1	3	2	3	1	21	11
374	1	1	1	1	3	1	1	1	1	3	1	4	1	2	1	3	1	1	1	1	20	10
375	4	1	2	1	3	1	1	1	3	2	1	2	1	4	1	4	3	2	3	1	30	11
376	4	1	3	1	3	1	1	1	5	5	1	3	1	3	1	5	5	1	5	1	41	10
378	4	1	4	1	4	2	1	1	3	3	1	3	1	3	2	3	4	3	3	1	34	14
379	3	1	1	1	1	1	1	1	1	1	1	3	1	1	1	2	3	1	1	1	17	10
380	5	1	3	1	3	1	1	1	4	5	1	3	1	4	1	4	4	1	3	1	38	10
381	4	3	2	1	3	1	1	1	4	1	1	3	1	3	3	3	3	2	3	1	29	15

## Sheet: Empathy Numerical
Subject Number	Q1	Q2	Q3	Q4	Q5	Q6	Q7	Q8	Q9	Q10	Q11	Q12	Q13	Q14	Q15	Q16	Q17	Q18	Q19	Q20	Q21	Q22	Q23	Q24	Q25	Q26	Q27	Q28	Fantasy Scale	Empathic Concern Scale	Personal Distress Scale	Perspective-Taking Scale
116	3	4	4	4	3	1	4	3	4	2	4	4	0	3	4	0	1	1	0	4	3	4	4	0	4	4	0	4	22	24	4	26
118	3	2	2	1	3	1	2	4	4	2	3	1	2	2	1	3	2	3	1	3	3	4	3	1	1	3	0	2	18	19	9	16
119	3	3	3	4	4	2	4	3	4	4	3	4	1	3	0	3	4	4	1	4	3	4	2	0	3	4	2	3	24	26	14	18
121	2	3	3	3	3	3	3	3	4	2	3	3	2	3	4	2	0	4	1	2	3	3	3	0	3	3	0	2	19	22	8	21
124	1	4	2	3	1	2	4	4	3	1	1	3	0	N/A	4	1	1	4	1	4	3	4	2	1	2	3	0	2	15	22	6	18
125	4	4	4	4	4	1	4	3	3	3	2	3	0	3	3	2	3	4	0	3	4	3	3	0	4	4	0	4	24	24	7	24
126	1	2	4	4	2	1	2	1	3	2	1	4	4	4	2	0	1	4	2	4	1	3	0	0	1	1	3	1	10	24	13	11
130	4	3	0	3	0	2	2	1	3	3	3	3	3	3	1	2	4	4	2	3	4	4	3	2	1	3	2	3	17	23	18	13
131	2	3	3	4	2	1	3	2	3	3	2	3	3	3	3	2	2	3	2	3	2	3	2	2	3	3	2	2	17	22	15	17
132	4	2	0	1	0	2	0	2	4	4	3	0	4	2	0	1	4	4	3	2	2	1	0	4	2	0	3	2	5	16	24	11
133	4	4	4	4	4	4	4	4	4	4	4	4	1	4	4	4	3	4	2	4	4	4	4	1	4	4	1	4	28	28	16	28
136	3	2	4	3	3	2	3	1	3	2	1	1	2	2	1	2	1	4	2	3	1	3	2	0	0	3	0	1	17	20	9	9
137	2	3	4	4	3	2	1	4	3	4	4	2	2	4	2	0	3	4	0	4	4	4	2	0	3	4	2	4	14	26	13	25
138	2	2	4	0	1	1	2	3	4	2	3	3	2	4	3	3	2	4	1	4	4	3	2	1	3	1	2	4	14	21	11	24
139	3	3	4	4	4	1	3	4	4	4	4	3	4	3	2	2	1	4	0	3	4	2	2	0	2	3	0	1	20	23	10	21
140	3	1	3	3	2	2	3	3	2	4	4	0	3	1	2	3	2	3	4	3	4	1	1	1	3	3	1	2	15	14	17	21
141	3	2	4	4	3	0	2	4	4	2	4	4	3	4	3	2	2	4	0	3	3	3	3	0	3	3	2	4	20	24	9	25
142	4	3	4	2	4	2	4	1	4	3	4	4	3	3	3	3	1	4	3	4	3	4	4	1	3	4	3	3	27	24	16	21
143	4	4	3	4	3	4	3	2	4	2	4	0	2	3	3	2	3	4	0	3	3	2	1	1	3	3	0	3	16	24	12	21
144	4	4	4	3	1	1	0	2	4	2	2	2	3	2	2	1	2	4	0	2	4	1	3	0	1	1	4	1	12	20	12	16
145	1	3	3	3	2	3	3	1	3	2	2	4	2	3	2	3	1	4	1	3	3	3	4	1	1	1	0	2	18	22	10	14
146	4	4	0	2	4	1	3	2	3	3	2	4	4	3	2	4	3	3	2	3	2	3	4	1	1	4	2	1	27	21	16	10
147	4	4	4	3	4	2	4	3	4	4	4	4	3	3	2	4	4	3	3	4	4	4	4	3	3	3	1	4	27	25	20	24
148	3	3	0	3	2	1	3	3	3	3	2	2	3	3	0	1	1	3	1	3	2	4	3	0	2	3	0	3	17	22	9	12
149	3	4	4	4	4	2	4	3	4	0	4	4	3	4	4	4	1	4	1	4	3	4	4	1	3	4	1	4	27	28	9	25
150	3	4	2	4	2	2	3	4	4	3	3	2	4	4	4	2	2	4	1	4	4	4	4	2	4	4	2	4	20	28	16	25
151	3	2	3	4	4	1	4	4	4	2	3	4	3	3	2	2	1	3	1	3	4	3	3	1	2	4	0	2	24	22	9	20
152	2	4	2	2	4	3	4	2	3	2	3	4	2	1	1	4	2	3	2	3	1	3	4	1	2	4	1	2	26	19	13	13
153	3	3	4	4	3	0	4	2	4	0	2	4	3	3	2	1	0	4	1	4	2	4	2	0	1	2	1	2	19	26	5	15
155	3	4	3	4	1	1	2	4	3	1	4	1	0	3	3	1	1	3	1	3	4	3	1	0	3	1	0	4	10	23	4	25
156	2	2	3	4	3	2	3	3	3	2	3	4	3	3	2	4	2	4	2	2	4	3	3	1	3	4	1	2	23	21	13	20
157	4	3	4	4	4	2	3	3	4	3	4	3	0	2	2	4	2	3	0	4	4	3	4	0	2	4	2	4	26	23	9	23
158 Poss	4	4	2	3	2	1	1	2	4	1	2	0	2	3	3	0	1	4	2	3	2	3	0	1	3	0	1	2	7	24	9	16
159	4	4	2	4	4	1	4	3	4	1	3	4	1	4	1	4	1	4	1	4	4	4	4	0	3	4	1	4	28	28	6	20
161	3	3	3	3	3	3	3	3	3	3	3	3	2	3	3	3	3	3	3	3	3	3	3	2	3	3	2	3	21	21	18	21
162	4	4	4	4	3	3	4	3	4	2	4	4	1	3	3	3	3	4	0	3	3	3	4	0	3	3	0	4	25	25	9	24
163	3	4	4	4	4	4	3	4	4	4	4	4	2	4	3	2	4	4	2	4	3	4	4	0	4	3	2	4	23	28	18	26
164	4	3	3	2	4	1	3	2	3	1	2	4	2	3	1	2	1	4	1	3	2	2	3	1	1	3	0	1	23	20	7	12
165	4	3	3	4	4	1	4	4	4	2	4	4	1	4	2	3	1	4	3	4	4	4	4	0	1	4	0	3	27	27	8	21
167	2	0	4	1	3	0	1	4	2	0	2	1	0	0	2	2	0	2	1	0	3	2	2	0	3	3	0	3	14	7	1	21
168	1	0	2	1	3	0	0	4	3	4	3	0	0	1	3	1	4	2	0	2	2	2	1	0	1	0	0	1	6	11	8	16
169	4	4	4	4	4	1	4	4	4	0	4	4	1	4	4	2	2	4	0	3	4	2	3	0	4	4	0	4	25	25	4	28
170	4	4	1	3	4	3	4	1	3	3	2	4	2	3	2	4	3	4	1	4	1	3	4	1	2	4	1	2	28	24	14	11
171	2	3	3	4	3	1	3	3	3	4	2	4	1	3	3	2	2	4	1	3	3	3	3	0	1	3	1	2	20	23	10	17
172	2	2	4	4	1	3	4	3	4	4	4	3	3	3	3	0	2	4	2	3	3	3	0	0	2	0	1	2	10	23	15	21
173	2	3	3	2	4	1	3	3	4	2	2	3	0	1	3	2	3	3	0	2	3	2	2	0	2	3	0	2	19	17	6	18
174	0	4	3	4	2	0	1	4	4	3	3	1	1	3	3	0	1	4	0	3	3	3	1	0	3	3	1	3	8	25	6	22
175	3	2	4	2	4	1	4	4	4	4	3	4	1	3	4	3	4	4	1	3	3	4	4	0	3	4	0	3	26	22	11	24
176	4	4	3	3	1	0	3	2	4	3	3	1	1	3	3	2	2	3	0	4	3	4	2	0	1	2	0	2	15	25	6	17
177	4	0	2	3	4	0	4	2	4	2	2	4	0	4	0	2	0	4	0	2	2	1	1	0	2	2	0	0	21	18	2	10
178	2	3	4	3	3	2	2	3	4	0	4	3	2	3	3	1	1	4	1	2	4	2	1	0	3	4	1	2	16	21	7	23
179	2	3	4	4	4	2	3	3	3	3	2	4	3	4	4	0	1	4	1	2	2	3	3	0	3	3	1	2	19	23	11	20
180	4	1	2	0	4	0	2	3	3	0	3	4	0	1	3	2	1	3	0	3	4	1	2	0	2	3	0	3	21	12	1	20
181	1	4	2	4	2	1	2	4	4	3	4	4	2	3	4	2	3	4	1	3	4	4	2	0	4	3	2	3	16	26	12	25
182	3	3	3	4	2	1	3	2	4	2	3	3	1	2	2	3	1	3	1	2	3	3	3	1	2	2	1	3	19	21	8	18
184	3	3	3	2	0	3	1	3	3	2	3	2	1	2	0	1	2	3	2	1	1	3	2	0	1	1	0	2	10	17	10	13
185	3	3	3	3	3	2	4	2	3	3	3	4	3	3	1	3	2	3	1	4	2	3	3	1	1	3	1	3	23	22	13	15
186	1	2	2	4	1	1	3	3	3	0	3	2	2	2	3	2	1	4	2	1	2	4	3	0	1	2	1	2	14	20	7	16
187	4	2	3	2	1	2	1	3	3	3	3	2	2	3	2	3	2	3	0	4	2	4	2	1	2	3	2	3	16	21	12	18
188	2	1	2	2	2	0	2	1	2	1	1	4	2	2	2	2	0	3	1	1	1	1	1	0	1	3	0	1	16	12	4	9
189	2	4	2	3	2	0	3	4	4	4	3	0	4	3	0	0	0	4	0	4	0	3	0	0	0	0	0	2	7	25	8	11
190	4	2	4	3	4	1	3	1	4	2	4	1	1	3	2	4	1	3	0	2	4	4	3	0	2	4	0	1	23	21	5	18
191	4	2	3	4	3	4	2	4	4	2	3	3	0	3	2	4	0	4	0	4	3	2	1	0	2	3	1	2	20	23	7	19
192	0	2	4	4	0	0	4	3	4	1	1	2	3	2	0	0	0	4	2	2	1	3	0	0	1	0	0	3	6	21	6	13
194	4	4	3	3	4	1	4	4	4	1	2	4	1	4	4	4	3	4	0	3	3	0	4	0	2	4	0	3	28	22	6	21
195	3	3	4	4	4	1	4	3	3	1	3	4	2	3	1	3	2	3	1	3	3	2	3	1	4	3	1	3	24	21	9	21
196	2	1	3	2	0	1	3	2	3	1	2	4	3	3	1	3	0	2	1	2	2	1	2	1	1	2	0	2	16	14	7	13
197	2	4	3	4	1	0	4	3	2	2	4	1	2	3	4	0	2	4	1	3	3	2	1	1	3	2	0	3	11	22	8	23
198	3	4	3	4	1	4	3	3	4	3	4	2	3	3	3	3	3	4	1	4	3	4	4	1	3	3	3	4	19	27	18	23
199	2	3	4	4	3	2	2	4	3	2	3	4	2	3	2	1	3	3	2	3	3	3	3	2	3	3	2	3	18	22	15	22
200	4	2	3	4	3	2	3	3	3	3	3	4	4	4	2	1	3	4	3	3	3	4	2	0	1	4	2	2	21	24	17	17
201	3	2	3	1	1	2	3	4	1	3	3	1	1	2	1	2	1	1	2	2	3	3	3	3	3	1	3	3	14	12	15	20
202	3	1	1	3	2	3	1	2	2	2	2	1	1	2	1	3	2	3	2	1	1	1	3	1	1	2	1	1	15	13	12	9
203	3	0	4	1	3	2	0	4	3	4	4	4	0	0	4	1	1	0	0	1	3	1	4	0	4	4	0	4	19	6	7	27
204	3	3	4	1	4	2	4	3	3	2	4	4	1	4	3	4	3	3	1	3	2	1	3	1	1	3	0	1	25	18	10	18
205	1	3	4	4	1	0	4	3	3	1	4	1	3	3	4	0	1	4	1	3	4	4	0	0	4	1	0	3	8	24	6	26
206	4	2	0	0	4	2	0	0	4	2	3	0	0	0	0	3	2	4	0	4	2	4	2	0	0	4	4	4	17	18	10	9
207	1	3	4	3	0	2	0	4	3	3	3	0	1	4	2	2	2	3	0	2	4	4	1	0	4	4	0	4	8	22	8	25
208	0	3	2	4	3	3	4	2	4	3	3	4	3	4	3	0	2	4	2	3	3	4	0	0	2	1	1	3	12	26	14	18
209	4	4	4	4	4	2	4	4	4	3	4	4	3	4	3	4	0	4	1	4	4	4	4	1	1	2	0	4	26	28	10	24
2090	2	3	4	3	4	3	4	3	3	2	3	4	3	3	2	4	2	3	2	4	3	3	3	1	3	4	2	4	25	22	15	22
210	3	2	4	2	1	2	3	3	4	1	3	3	1	2	4	2	1	3	1	3	4	4	3	0	3	2	0	4	17	20	6	25
211	1	2	3	3	2	0	3	3	3	1	3	3	2	4	3	0	2	4	0	2	3	2	2	0	2	1	0	2	12	20	5	19
212	0	3	2	4	3	0	4	1	2	4	4	3	4	4	4	0	3	4	2	4	3	4	4	0	2	1	1	4	15	25	14	20
213	2	2	4	3	0	1	1	2	3	3	2	0	1	2	1	0	2	3	1	4	3	4	2	0	2	0	1	3	5	21	9	17
214	4	4	4	4	3	4	4	3	4	2	2	4	2	4	2	4	1	4	2	3	3	4	4	0	3	3	0	2	26	27	11	19
215	2	1	2	1	2	0	3	3	2	4	3	3	0	2	3	1	3	2	0	1	3	1	3	0	1	2	0	2	16	10	7	17
2150	4	4	3	4	4	3	4	4	4	3	4	4	3	4	3	4	3	4	1	4	4	4	4	1	1	4	3	2	28	28	17	21
216	4	1	2	1	2	4	2	2	3	3	3	1	1	1	0	1	3	3	3	1	2	1	1	2	1	1	2	2	12	11	18	12
217	2	2	3	3	1	1	3	2	2	3	3	2	2	3	0	1	1	3	1	3	2	4	1	0	2	1	1	2	11	20	9	14
218	2	3	4	1	4	2	3	4	4	0	4	4	0	3	3	2	0	4	0	2	4	2	4	0	3	4	0	3	23	19	2	25
219	0	1	2	1	1	1	2	2	2	3	3	1	2	1	1	1	3	2	2	2	2	2	1	2	1	1	1	2	7	11	14	13
220	4	1	4	3	3	0	4	3	2	0	3	4	1	2	3	2	1	4	0	3	4	3	4	0	4	4	0	3	25	18	2	24
221	3	4	4	4	1	4	2	3	4	0	3	2	1	3	3	0	0	4	0	2	3	3	3	0	2	1	0	2	12	24	5	20
222	3	2	4	1	3	1	0	4	3	1	4	0	2	3	3	0	2	2	0	3	4	1	1	1	3	4	1	2	11	15	8	24
223	3	3	0	4	0	2	2	3	3	2	3	2	3	4	1	3	3	4	1	3	3	4	4	1	1	0	3	3	14	25	15	14
224	3	2	4	3	2	1	4	3	2	2	3	4	1	1	2	3	1	3	2	2	4	2	4	0	0	4	2	3	24	15	9	19
225	4	2	3	3	3	2	4	4	2	1	1	1	0	2	4	4	1	3	1	4	3	2	4	1	2	4	0	3	24	18	6	20
226	4	3	3	1	3	3	3	2	3	3	3	4	3	2	1	2	3	2	2	3	2	3	3	1	2	3	1	2	22	17	16	15
227	1	2	4	2	2	1	4	4	2	3	2	3	2	1	2	1	3	3	1	2	3	3	2	1	2	3	1	3	16	15	12	20
228	1	3	2	4	0	1	3	3	2	3	3	2	2	3	4	1	1	4	1	4	4	4	1	1	3	0	3	3	8	24	12	22
229	3	1	2	2	3	2	4	3	3	1	1	4	3	2	1	2	1	1	1	2	2	0	3	1	1	2	4	2	21	11	13	12
230	3	3	2	4	2	0	1	4	4	3	3	1	1	1	1	1	1	3	1	1	3	3	1	0	3	1	1	2	10	19	7	18
231	4	4	3	4	3	1	4	4	4	3	4	4	3	4	3	3	1	4	1	4	4	4	4	2	3	3	1	3	25	28	12	24
232	4	3	3	1	4	0	3	3	4	2	3	3	1	3	2	3	1	2	1	3	3	2	3	1	3	4	1	2	24	18	7	19
233	2	1	1	3	1	2	3	3	4	1	1	4	3	3	0	3	2	4	1	2	2	4	3	1	0	1	0	1	17	21	10	8
234	3	3	4	4	1	0	3	4	4	4	4	2	0	3	2	3	4	4	0	4	4	3	2	0	4	2	1	2	16	25	9	24
235	3	1	3	1	3	2	2	3	1	1	2	3	1	2	3	2	1	2	1	1	3	2	3	1	1	3	1	2	19	10	8	17
236	4	2	2	3	0	0	4	3	2	2	2	1	4	4	2	4	4	4	2	2	2	2	4	2	0	2	2	2	19	19	16	13
237	3	1	4	1	3	0	4	4	4	1	3	4	2	2	2	4	0	3	0	1	2	1	4	0	2	4	0	2	26	13	3	19
238	1	2	4	4	0	4	3	2	4	3	2	4	3	4	3	2	4	4	4	4	1	4	3	3	4	3	2	2	16	26	23	18
239	1	2	3	4	2	2	1	2	3	3	3	3	3	2	2	3	3	3	2	3	3	2	2	1	2	2	1	3	14	19	15	18
240	1	2	3	4	2	3	3	4	4	4	3	1	2	2	2	2	2	3	1	3	3	3	2	0	3	2	1	3	13	21	13	21
241	1	3	3	4	2	1	3	3	4	2	3	4	2	2	3	1	1	4	1	3	3	4	2	0	2	2	1	3	15	24	8	20
242	4	4	3	2	3	2	3	3	4	2	3	3	4	4	3	2	0	4	2	3	4	3	3	1	2	2	1	2	20	24	12	20
243	3	3	2	3	4	4	4	2	3	4	3	4	3	3	2	3	4	4	2	3	2	2	4	0	1	4	1	2	26	21	18	14
244	2	3	3	3	1	1	2	2	3	1	2	2	2	4	3	3	1	4	1	3	2	3	3	0	2	2	0	2	15	23	6	16
245	3	3	3	2	1	1	3	3	3	4	3	1	2	3	2	1	4	3	2	2	3	3	2	1	2	3	1	3	14	19	15	19
246	1	2	1	4	3	2	2	3	3	1	2	4	3	4	4	3	1	4	1	3	3	3	3	0	3	3	0	3	19	23	8	19
247	4	2	3	3	2	4	3	2	2	3	2	2	3	3	2	2	3	3	3	2	2	2	2	2	1	2	3	2	17	17	21	14
249	1	2	3	4	4	1	4	4	4	2	4	4	1	4	3	3	0	4	1	3	4	3	3	0	3	4	3	4	23	24	8	25
250	3	3	4	3	2	0	3	3	2	1	2	3	1	2	3	2	1	4	1	3	3	2	3	0	2	3	0	3	19	19	4	20
251	1	3	3	3	4	2	4	3	3	3	3	3	2	4	1	4	2	4	2	3	2	3	4	1	3	4	1	3	24	23	13	18
252	4	4	0	3	3	1	3	3	3	4	3	4	3	3	0	3	4	3	1	3	3	0	4	1	3	3	0	3	24	19	14	15
253	3	4	4	2	3	3	3	3	2	4	3	3	4	3	4	3	3	3	2	3	4	4	3	3	2	4	3	3	22	21	22	23
254	2	4	4	4	4	0	4	4	4	0	4	4	2	4	4	3	0	4	1	4	4	4	3	0	4	4	0	4	24	28	3	28
255	2	2	3	4	0	1	4	4	4	2	4	S	3	4	4	0	0	4	1	4	4	4	0	0	4	3	1	3	9	26	8	26
256	3	4	4	1	3	3	4	4	3	3	4	2	2	4	3	3	1	4	1	4	3	4	4	0	3	4	1	3	23	24	11	24
257	2	3	4	1	4	1	4	2	4	3	2	3	4	4	4	1	3	4	2	2	3	4	4	1	3	4	4	2	22	22	18	20
258	2	3	2	3	1	2	2	2	1	1	3	4	2	3	3	1	1	3	2	2	2	2	1	1	3	1	1	2	12	17	10	17
260	2	1	3	2	2	2	0	4	4	4	4	3	1	1	2	0	4	4	2	4		4	2	0	1	3	1	1	12	20	14	15
261	4	4	3	4	1	1	1	3	3	3	2	1	1	4	2	0	3	4	1	3	2	2	2	1	2	3	1	3	12	24	11	17
262	4	2	2	1	2	2	1	1	3	1	1	1	2	3	1	2	1	3	2	2	2	1	3	1	1	2	1	1	15	15	10	9
263	2	2	3	2	0	2	3	0	3	0	2	1	2	2	1	1	2	2	2	2	1	2	3	2	2	1	1	2	11	15	11	11
264	4	3	3	1	2	1	4	1	2	3	3	3	1	3	1	1	4	3	3	3	3	2	1	3	2	3	3	1	18	17	18	14
265	3	2	3	4	3	2	3	2	3	3	3	4	2	3	3	2	3	3	2	3	3	4	3	2	3	3	1	3	21	22	15	20
266	3	4	2	0	4	2	3	1	4	2	4	4	2	4	1	4	3	4	2	3	3	3	4	1	3	4	4	2	26	22	16	16
267	4	4	4	4	2	1	1	3	4	4	4	2	1	3	0	3	3	4	0	4	3	4	2	0	3	4	0	4	18	27	9	21
268	3	2	2	1	3	1	2	2	3	0	2	2	1	3	2	1	1	2	1	2	2	2	1	1	2	3	1	2	15	15	6	14
269	3	1	3	3	2	1	2	3	3	3	2	3	3	2	3	2	2	3	3	2	4	3	2	3	2	2	1	2	16	17	16	19
270	2	3	2	4	2	0	2	3	3	0	2	2	1	2	3	2	0	3	1	2	3	3	4	0	1	1	0	1	15	20	2	15
271	2	2	3	4	0	2	4	3	3	3	2	2	1	4	3	1	1	4	1	2	3	2	4	1	3	2	2	4	15	21	11	21
272	4	4	4	4	2	1	2	4	3	3	4	1	2	3	3	2	1	4	2	3	4	3	2	2	4	4	3	4	17	24	14	27
273	1	3	3	4	2	2	4	3	3	3	3	4	3	3	0	2	2	4	1	3	2	1	4	2	2	3	1	3	20	21	14	16
274	2	1	1	2	2	2	2	4	4	3	4	1	2	2	0	1	1	3	2	2	3	4	1	2	4	1	2	2	10	18	14	18
275	2	3	4	3	1	0	2	3	3	1	4	3	1	3	3	2	1	3	1	3	3	3	3	0	3	3	0	3	16	21	4	23
276	3	2	3	4	4	0	3	3	3	3	4	4	2	4	3	3	2	4	1	3	3	4	4	1	3	3	1	3	24	24	10	22
277	4	3	1	4	1	3	2	4	3	2	3	0	4	4	4	4	4	4	2	4	4	4	4	2	3	4	3	3	19	26	20	22
278	3	3	1	3	3	3	3	1	3	3	3	3	3	3	3	3	3	3	1	3	3	1	3	1	1	1	1	1	19	19	15	13
279	4	4	4	4	3	3	3	4	4	4	4	4	1	4	2	0	4	4	1	3	3	4	2	1	3	4	3	4	20	27	17	24
280	4	4	2	2	4	1	1	4	4	3	3	4	2	3	3	4	3	4	2	3	3	4	4	1	1	4	1	2	25	24	13	18
281	4	4	3	4	1	0	3	3	3	3	3	3	1	4	1	1	3	4	0	3	2	4	2	0	1	3	2	2	17	26	9	15
282	NOT	FILLED	OUT																										0	0	0	0
283	3	1	1	2	0	0	2	1	2	4	0	0	0	3	3	0	4	2	0	1	3	1	0	0	1	0	0	2	5	12	8	11
284	4	2	3	1	2	1	2	2	4	2	2	3	0	1	1	1	1	3	0	2	2	2	4	0	2	3	0	1	19	15	4	13
285	4	3	3	2	4	2	4	4	3	4	4	4	2	4	4	4	4	4	2	3	4	3	4	1	4	4	1	3	28	22	16	26
286	4	2	3	4	2	3	2	3	3	1	3	1	3	4	3	2	4	4	1	3	3	3	2	3	3	3	3	3	16	23	18	21
287	3	2	2	2	4	2	3	3	3	2	2	4	1	1	3	3	0	3	1	1	2	2	3	0	0	4	0	1	24	14	6	13
288	2	3	3	4	2	2	1	4	3	2	3	3	1	3	3	1	0	4	1	3	3	2	1	0	2	2	0	3	12	22	6	21
289	1	0	3	1	0	2	2	1	0	4	0	1	3	0	1	0	2	0	3	0	0	0	0	1	0	0	0	0	4	1	15	5
290	3	2	4	4	3	0	2	4	4	1	3	3	0	3	1	1	1	4	0	4	4	3	3	0	2	3	1	1	18	24	3	19
291	2	2	2	1	0	2	2	3	4	0	2	1	0	2	2	0	2	4	0	3	4	2	1	0	1	2	0	2	8	18	4	16
292	3	4	3	4	2	3	4	3	4	4	4	3	4	4	3	2	4	4	2	4	4	4	2	2	2	3	2	3	19	28	21	22
293	1	4	3	2	2	0	3	2	4	2	2	4	2	4	1	0	0	4	0	2	2	3	0	0	1	2	0	2	12	23	4	13
294	3	2	2	3	0	2	3	3	3	2	3	3	3	3	2	1	4	3	2	1	3	2	1	2	1	2	1	3	13	17	16	17
295	4	4	4	2	2	2	2	4	4	4	4	3	1	3	2	0	2	3	1	4	4	2	1	1	3	3	1	3	15	22	12	24
296	4	4	3	1	4	1	3	3	4	2	3	4	0	4	4	3	2	2	0	3	2	3	3	0	2	4	0	2	25	21	5	19
297	4	4	3	1	4	2	4	3	4	4	2	4	3	2	3	4	3	4	1	4	4	3	4	1	2	4	0	2	28	22	14	19
298	4	2	2	3	1	1	2	2	3	3	2	1	3	2	3	2	3	3	2	3	2	3	2	2	1	1	1	2	13	19	15	14
299	2	3	4	4	2	3	2	3	3	1	3	4	1	2	3	0	2	3	1	1	3	4	2	1	4	2	1	1	14	20	10	21
300	2	2	2	4	3	2	3	2	3	3	3	3	2	3	3	2	3	3	2	3	2	2	2	2	2	3	2	2	18	20	16	16
301	0	3	3	4	2	1	2	3	3	3	3	3	2	3	3	1	2	4	1	3	3	2	2	0	3	2	1	3	12	22	10	21
302	2	3	4	44	1	1	3	4	4	2	4	2	2	3	4	1	3	4	2	3	4	4	2	2	3	2	1	3	13	65	13	26
303	3	3	3	2	4	3	4	3	4	2	3	3	1	4	1	1	3	4	0	4	4	3	4	2	4	N/A	4	4	19	24	15	22
304	4	3	4	1	2	0	3	4	4	2	3	3	0	2	2	2	3	3	0	2	3	3	4	1	3	2	0	1	20	18	6	20
305	3	4	3	4	2	4	3	3	4	4	4	4	2	4	3	0	3	4	2	3	3	2	2	0	3	1	2	3	15	25	17	22
306	1	3	4	1	2	0	1	4	4	0	3	3	0	4	3	1	1	4	0	2	4	2	1	0	3	3	0	4	12	20	1	25
307	3	1	3	3	2	3	3	3	2	2	2	3	2	3	3	3	3	3	2	2	3	2	3	1	2	2	1	2	19	16	14	18
308	1	1	4	4	4	2	2	4	4	3	4	3	2	3	2	2	2	4	2	2	4	4	4	2	4	3	1	4	19	22	14	26
309	4	2	3	1	4	0	3	3	4	3	3	4	0	2	3	4	3	3	0		3	3	0	4	0	3	4	0	22	15	14	15
310	1	2	4	3	1	2	2	3	3	1	3	3	3	2	2	3	0	3	2		3	3	4	3	1	3	3	1	17	16	14	17
311	2	3	3	3	2	1	4	3	3	1	3	3	3	3	2	0	1	4	1		3	2	3	1	0	3	1	0	17	18	9	14
312	0	4	2	4	1	3	2	3	3	2	3	1	2	3	2	4	1	3	1		2	2	3	2	1	2	1	1	13	19	12	14
313	3	2	4	4	3	1	4	4	4	2	3	3	1	4	4	2	1	4	1		3	4	3	4	1	2	3	0	20	22	13	19
314	4	4	3	3	3	2	2	2	3	0	2	4	2	4	2	4	1	4	1		3	2	3	3	0	2	3	1	22	20	12	13
315	3	3	4	4	2	2	4	4	3	3	4	4	3	3	3	4	1	4	3		4	4	3	4	2	3	4	1	23	21	20	22
316	2	4	3	3	4	4	3	4	2	1	4	3	3	3	3	3	1	3	3		4	4	4	3	2	3	3	3	22	19	18	23
317	3	3	3	1	4	3	4	4	4	4	4	4	0	2	3	3	1	4	1		3	4	3	3	1	2	3	2	23	18	15	20
318	4	4	4	2	4	4	4	2	4	4	4	4	4	4	3	1	4	4	1		3	3	3	3	1	3	3	0	23	21	23	17
319	2	0	4	1	2	0	2	3	1	3	3	2	0	1	2	1	4	2	0	1	3	0	1	0	2	2	0	1	12	6	7	18
320	3	3	3	4	3	1	2	3	3	4	3	3	1	3	1	3	2	3	1	2	3	4	3	1	3	3	1	2	20	22	11	18
321	2	4	3	3	4	0	2	3	4	1	4	3	1	4	3	3	1	3	0	2	4	3	2	0	3	3	1	4	19	23	4	24
322	3	3	4	4	4	2	4	3	3	4	3	4	2	3	2	3	3	4	2	3	4	4	4	2	3	4	2	4	26	24	17	23
324	2	2	3	1	3	1	3	2	2	2	3	3	2	2	2	2	1	2	1	3	3	1	2	1	2	2	2	2	17	13	10	17
325	2	3	4	0	3	4	3	3	4	4	4	1	2	2	2	2	4	0	2	2	4	3	2	2	2	4	2	2	17	14	20	21
326	4	4	4	4	4	0	1	1	4	4	3	3	1	4	3	0	3	4	1	4	3	4	3	0	3	4	1	4	19	28	10	21
328	3	3	3	2	0	1	3	0	4	3	2	0	1	2	0	0	4	4	1	2	1	3	0	0	3	2	3	2	8	20	13	11
329	4	4	4	2	4	1	1	3	4	4	4	0	2	4	4	4	4	4	2	2	4	4	2	1	2	4	2	4	19	24	16	25
330	2	1	3	2	1	1	3	1	3	1	2	3	2	3	3	2	1	3	2	2	2	3	2	0	2	3	0	1	16	17	7	14
331	2	1	3	2	2	1	2	2	1	2	1	3	1	3	2	1	3	3	1	1	2	2	1	1	1	3	1	2	14	13	10	13
332	1	2	1	2	1	2	3	2	2	3	1	4	1	2	1	0	1	3	3	0	3	2	1	1	1	1	1	2	11	13	12	11
333	4	4	4	4	2	3	3	2	3	1	3	3	2	3	3	2	1	4	0	2	2	2	3	0	3	1	0	2	18	22	7	19
334	3	4	3	4	2	1	3	3	4	1	3	1	1	3	4	2	2	4	1	4	3	4	2	1	4	2	3	3	15	27	10	23
335	1	2	3	4	3	3	3	3	3	2	4	3	3	3	2	3	1	4	2	3	3	3	4	1	3	4	1	3	21	22	13	21
336	2	3	4	3	3	0	4	3	4	2	3	3	3	3	2	2	3	4	0	3	3	4	2	0	2	2	0	3	18	24	8	20
337	4	4	4	4	3	0	2	4	4	4	4	3	4	4	4	0	3	4	0	2	4	3	0	0	4	4	0	4	16	25	11	28
338	1	3	4	4	2	2	3	3	3	0	3	4	1	3	4	2	1	4	1	2	3	4	2	0	3	2	1	4	16	23	6	24
339	4	1	3	3	3	2	4	3	3	2	2	4	2	2	3	3	1	2	1	2	4	2	3	0	0	2	1	2	23	15	9	17
340	3	3	4	4	2	0	2	3	4	3	3	3	2	3	2	0	1	4	0	3	3	4	3	0	3	3	0	3	16	25	6	21
341	4	4	2	4	3	1	4	1	4	3	3	3	3	3	2	4	3	4	1	3	2	3	3	1	1	3	2	1	24	25	14	12
342	4	3	3	1	2	2	1	2	3	3	2	2	3	3	0	3	2	3	2	3	3	3	2	1	1	1	1	2	15	19	14	13
343	4	2	2	2	1	2	0	3	2	3	3	1	1	2	2	3	2	3	2	N/A	3	3	2	2	3	3	2	2	14	14	14	18
344	2	1	4	3	2	0	1	4	4	3	2	3	0	2	1	2	2	4	1	3	2	3	2	0	1	3	0	3	15	20	6	17
345	3	3	2	3	3	2	3	3	3	2	3	3	3	3	2	2	0	3	0	4	3	3	4	1	2	1	0	3	19	22	8	18
346	2	3	4	4	3	0	3	3	3	0	4	4	1	3	2	3	0	4	0	4	4	4	4	0	3	3	0	4	22	25	1	24
347	2	2	3	3	1	1	3	2	3	1	3	3	2	3	1	1	1	3	1	2	3	2	1	0	2	0	0	3	11	18	6	17
349	4	1	2	1	0	2	3	3	4	2	3	3	1	0	1	4	3	4	0	1	3	1	4	1	2	2	0	3	20	12	9	17
350	4	3	3	1	3	2	4	4	4	1	4	3	3	3	2	2	2	3	0	3	2	3	4	0	2	4	0	2	24	20	8	19
351	4	4	3	4	4	1	4	2	4	1	3	4	4	4	1	3	1	4	1	4	2	4	4	0	3	4	0	1	27	28	8	15
352	3	3	3	4	2	2	4	3	3	3	2	4	4	3	3	4	2	4	3	3	4	2	3	2	1	3	1	3	23	22	17	19
353	4	2	3	2	3	4	3	2	2	4	3	3	4	1	3	1	4	3	4	1	3	1	2	3	2	3	3	2	19	12	26	18
354	3	3	3	4	3	3	3	3	3	2	3	3	1	3	3	3	0	4	1	3	4	3	3	0	3	3	1	3	21	23	8	22
355	4	2	1	1	4	1	2	1	4	1	2	1	0	1	2	1	1	4	3	2	3	4	0	0	0	1	2	3	13	18	8	12
356	4	2	4	4	4	1	2	4	3	0	1	3	1	3	2	0	0	4	0	3	3	4	2	0	4	3	0	3	18	23	2	21
357	4	1	0	1	0	1	1	3	0	4	3	2	0	0	1	2	1	1	0	1	1	1	0	0	3	1	0	2	10	5	6	13
358	2	1	3	2	1	2	1	4	3	3	2	2	1	2	3	1	2	3	1	2	3	1	1	0	2	2	0	3	10	14	9	20
359	4	2	4	3	4	1	3	4	3	2	3	4	1	3	4	4	2	4	4	3	4	3	4	1	3	4	1	3	27	21	12	25
360	3	2	3	2	3	2	3	1	3	2	1	2	1	2	3	2	3	2	3	3	2	1	2	2	1	1	2	1	16	15	15	12
361	3	1	3	1	4	1	4	3	4	3	3	4	0	3	3	4	3	3	0	3	3	0	4	0	3	4	0	3	27	15	7	21
363	MISSING	DATA																											0	0	0	0
364	1	3	4	3	2	1	3	3	4	1	3	3	0	4	2	1	0	4	1	2	4	1	2	1	2	2	0	2	14	21	4	20
366	3	1	3	2	3	4	3	3	3	3	3	3	3	2	1	1	3	3	1	2	3	3	2	1	3	3	1	2	18	16	16	18
368	1	3	4	4	0	2	3	3	3	0	3	3	4	4	3	0	0	4	1	2	3	3	0	0	2	0	0	2	7	23	7	20
369	3	4	1	1	0	2	0	4	4	3	4	0	0	1	0	0	0	2	0	2	2	4	0	0	2	1	3	2	4	18	8	15
370	3	3	4	1	3	3	3	4	4	1	4	3	1	2	2	3	1	4	0	3	3	3	3	1	4	3	0	2	21	20	7	23
371	3	0	2	1	1	1	2	0	1	2	3	3	1	1	1	1	1	2	2	1	2	2	3	0	0	3	0	1	16	8	7	9
372	3	2	3	3	4	2	3	3	3	1	2	3	2	3	0	3	2	3	2	3	3	2	3	1	1	3	1	2	22	19	11	14
373	2	2	3	2	1	0	3	3	4	2	1	3	1	1	2	1	1	3	0	3	3	2	1	0	3	2	0	3	13	17	4	18
374	2	2	3	4	1	1	3	3	3	0	3	3	1	3	3	0	1	4	2	3	4	4	1	1	3	0	0	3	10	23	6	22
375	3	3	4	0	3	3	4	2	3	3	3	3	2	3	3	2	1	3	1	2	2	4	4	1	1	3	2	2	22	18	13	17
376	2	3	3	2	1	2	2	4	3	2	4	3	4	1	2	0	0	3	0	1	4	2	2	0	2	2	0	4	12	15	8	23
378	4	3	4	4	3	2	2	4	3	4	3	3	2	4	3	1	2	4	1	4	4	4	3	2	2	4	2	4	20	26	15	24
379	4	2	1	1	4	3	3	2	3	1	2	3	2	1	1	3	2	1	2	2	3	2	3	2	3	4	2	3	24	12	14	15
380	0	2	2	2	0	1	2	4	3	4	3	1	1	2	4	0	1	3	1	3	2	1	0	0	0	0	0	2	3	16	8	17
381	1	4	4	3	2	2	4	4	4	3	4	1	3	4	4	0	2	4	0	4	4	4	1	0	4	1	4	4	10	27	14	28

## Sheet: Social Desirability RAW
Subject Number	Q1	Q2	Q3	Q4	Q5	Q6	Q7	Q8	Q9	Q10	Q11	Q12	Q13
116	A	A	B	C	E	D	D	A	D	C	D	A	E
118	D	D	D	D	D	C	C	C	E	B	D	C	C
119	E	A	E	D	E	A	B	A	D	D	D	D	E
121	C	A	A	A	D	B	B	N/A	D	D	C	B	D
124	C	A	B	B	D	A	C	D	B	C	C	B	C
125	D	D	C	A	D	B	D	A	E	A	D	A	E
126	A	A	A	C	E	B	D	A	B	A	C	A	D
130	C	D	D	E	D	A	C	D	C	B	D	B	C
131	D	C	B	C	D	B	C	B	D	C	D	B	C
132	E	E	E	D	C	B	A	A	C	A	E	C	B
133	E	D	D	C	D	D	E	C	E	B	D	C	C
136	B	C	D	D	C	C	D	C	D	B	C	C	A
137	A	C	A	A	E	A	E	A	D	B	D	A	B
138	B	A	E	B	E	A	D	B	E	E	D	A	A
139	B	D	E	E	E	E	C	C	C	D	B	B	C
140	C	D	D	D	D	D	E	D	C	C	E	C	B
141	B	A	A	A	E	A	D	A	D	D	A	C	E
142	A	A	D	A	D	A	B	A	D	B	C	A	D
143	D	B	E	A	C	D	B	B	B	B	C	A	B
144	B	D	C	C	C	D	C	D	C	D	C	C	A
145	C	B	B	A	B	B	D	A	D	D	D	B	A
146	C	E	D	B	D	C	D	C	C	C	D	C	D
147	E	D	B	D	D	C	D	C	D	C	E	C	E
148	E	C	E	A	D	A	D	A	C	D	D	D	B
149	A	B	B	B	E	B	C	A	E	D	A	B	D
150	C	B	C	B	D	C	B	A	D	B	B	A	B
151	C	B	C	B	B	B	C	D	D	B	C	B	D
152	B	D	B	B	D	A	C	B	C	B	E	C	D
153	A	A	B	C	D	B	C	B	C	A	D	C	B
155	C	A	B	B	D	B	D	A	E	E	D	A	D
156	A	B	E	B	B	B	C	A	B	B	D	A	D
157	C	D	D	E	C	C	C	E	B	B	D	D	A
158	D	C	D	A	C	A	C	B	D	A	D	B	D
159	E	B	E	B	D	B	E	B	E	D	B	B	B
161	D	C	D	B	D	B	D	D	D	B	D	B	D
162	C	C	B	B	E	A	E	C	D	C	C	A	E
163	D	B	E	A	E	C	D	A	E	C	C	A	D
164	B	D	B	B	C	C	D	D	C	B	D	C	B
165	A	C	B	A	D	A	E	C	C	B	E	B	E
167	B	B	A	D	C	B	E	A	D	C	C	C	A
168	D	A	E	B	D	A	E	B	E	C	B	C	C
169	A	A	B	B	C	A	E	B	D	E	A	A	A
170	C	B	D	D	D	A	B	A	D	D	C	B	C
171	C	C	D	B	D	B	D	A	C	A	C	B	C
172	C	A	D	A	E	A	D	B	E	A	B	C	E
173	D	D	B	C	E	D	C	D	C	C	D	C	C
174	E	C	D	B	E	B	D	B	E	D	B	B	B
175	D	C	D	D	E	B	D	A	D	C	D	D	C
176	C	B	B	C	D	B	D	B	C	C	C	B	C
177	A	E	A	E	C	E	A	C	A	C	A	C	A
178	B	B	A	D	D	C	C	B	D	A	D	B	B
179	D	B	C	A	E	A	C	A	D	C	A	B	A
180	C	C	C	E	D	B	D	E	B	B	B	B	A
181	C	C	B	A	D	B	C	C	D	B	D	B	C
182	C	C	D	C	E	C	B	B	D	C	D	B	D
184	C	B	D	D	B	C	C	B	D	A	D	C	B
185	D	E	B	A	D	C	D	D	D	C	D	B	C
186	C	B	C	A	C	B	D	B	C	B	C	B	C
187	E	D	E	E	D	C	D	D	D	C	E	D	C
188	D	D	C	D	C	B	C	D	B	C	C	C	B
189	C	A	E	E	C	B	C	A	C	A	D	C	B
190	C	B	B	D	D	A	C	A	D	C	B	C	D
191	C	C	D	E	D	B	E	C	E	C	D	A	C
192	C	B	D	A	E	A	C	C	E	C	C	A	B
194	D	D	C	E	C	B	B	C	B	A	E	D	C
195	D	D	B	C	E	C	D	A	D	D	D	A	C
196	B	C	C	D	D	D	C	B	B	B	C	A	B
197	C	C	C	B	D	B	D	A	B	B	B	B	C
198	C	A	B	B	D	A	E	B	E	D	D	A	E
199	A	B	C	A	D	B	D	B	D	D	B	B	C
200	E	C	C	A	E	B	B	D	D	B	C	D	C
201	D	D	D	D	D	D	D	B	C	B	D	B	B
202	B	B	C	C	E	D	C	B	B	D	D	B	C
203	C	A	A	E	E	E	D	C	E	C	E	D	A
204	B	D	D	C	B	B	D	B	D	B	B	B	C
205	C	B	B	A	B	A	B	A	C	B	B	A	D
206	E	C	E	E	A	B	C	B	B	C	E	E	B
207	A	C	B	A	E	B	E	A	E	A	A	A	A
208	A	B	B	C	E	A	C	C	D	D	C	B	B
209	C	B	D	B	D	B	C	A	D	C	D	A	E
209A	D	B	D	D	E	A	C	B	C	B	D	C	B
210	C	C	C	B	D	D	E	A	E	D	C	B	E
211	B	C	B	C	D	A	D	A	D	A	C	B	D
212	E	D	E	E	E	B	C	A	E	D	D	C	B
213	C	B	D	C	E	A	C	A	C	C	D	B	C
214	C	C	B	A	C	A	D	A	E	C	D	C	C
215	B	B	A	B	B	B	C	C	D	B	B	B	B
215a	C	D	E	E	E	C	D	B	D	A	E	C	B
216	C	D	D	D	B	D	D	E	B	E	E	E	C
217	E	C	E	C	D	B	C	C	D	D	D	B	D
218	A	A	B	D	E	A	B	A	D	E	A	A	B
219	C	B	C	B	D	A	C	A	B	C	A	B	D
220	C	C	B	A	C	B	D	C	D	C	B	A	B
221	B	A	A	A	E	B	E	B	D	D	C	C	B
222	D	D	B	E	D	B	E	A	D	C	C	D	E
223	A	B	C	E	D	B	C	A	A	B	B	C	E
224	C	D	D	B	B	C	B	B	B	B	C	A	B
225	B	C	C	B	D	A	D	B	D	D	E	D	B
226	B	E	D	C	D	D	D	D	B	B	D	D	B
227	D	B	C	D	D	A	D	D	D	D	C	D	E
228	B	A	B	D	D	B	C	D	E	C	D	B	C
229	D	D	B	A	E	C	B	E	B	C	B	C	C
230	B	B	B	C	F	A	D	C	E	D	D	B	C
231	B	D	A	A	D	A	B	A	E	B	D	D	B
232	C	D	B	D	C	D	E	A	D	B	C	B	D
233	B	D	B	A	D	D	B	E	D	A	C	D	D
234	D	D	E	E	D	D	E	C	D	B	E	C	C
235	C	D	C	C	D	D	C	B	B	C	D	B	B
236	C	C	C	A	E	B	E	D	C	A	E	C	B
237	D	D	E	D	D	A	E	A	D	A	E	A	D
238	D	A	B	A	B	A	D	B	B	D	B	B	D
239	C	C	B	C	C	C	D	B	C	D	B	B	A
240	C	D	D	A	D	D	A	B	C	A	B	C	C
241	B	A	C	A	E	B	E	A	E	D	A	A	B
242	C	B	C	D	D	C	C	B	C	C	D	A	D
243	D	D	E	C	C	B	C	C	C	B	E	B	A
244	A	B	A	A	D	B	E	B	D	B	C	A	B
245	E	C	E	E	C	B	D	A	D	C	B	B	C
246	C	B	A	A	E	A	C	A	D	C	C	A	B
247	D	C	D	C	B	C	C	B	B	A	D	C	A
249	C	A	B	B	D	A	F	B	D	D	C	B	D
250	B	B	B	B	D	B	C	B	C	D	B	B	C
251	E	C	D	D	C	C	B	B	D	B	C	C	B
252	B	D	D	B	B	D	D	D	B	A	D	A	D
253	E	D	E	C	E	B	E	A	B	A	D	C	B
254	C	A	B	C	E	A	E	B	D	C	D	A	B
255	C	B	B	B	D	A	C	A	D	B	C	A	D
256	B	C	D	B	E	A	D	A	B	C	B	A	B
257	C	B	D	C	C	B	D	A	D	D	C	A	C
258	C	C	D	C	D	C	C	B	D	C	D	C	A
260	D	C	B	A	D	C	D	B	D	D	E	C	D
261	D	B	C	C	C	B	D	D	D	C	D	C	C
262	D	C	D	C	C	C	B	D	B	C	D	D	B
263	C	B	A	A	C	A	B	B	B	B	C	D	A
264	B	D	A	D	C	C	B	A	B	B	D	D	D
265	D	B	B	B	D	C	C	C	C	B	E	B	B
266	C	C	B	B	D	C	B	B	C	B	D	B	A
267	E	C	E	D	D	B	D	B	D	B	E	D	C
268	D	C	C	E	C	C	A	C	D	B	D	D	C
269	E	C	D	B	E	C	D	B	E	E	C	C	E
270	B	B	B	C	D	D	B	D	D	D	D	C	C
271	B	B	C	A	E	A	E	C	C	C	C	C	D
272	C	B	D	C	E	B	E	A	E	D	D	A	D
273	E	D	D	E	C	B	C	B	B	B	D	D	B
274	D	D	C	C	D	D	D	D	C	C	E	B	B
275	B	B	C	D	D	B	D	A	D	B	C	A	C
276	C	B	D	C	D	B	D	B	D	C	D	B	C
277	E	E	E	D	C	B	B	E	E	C	D	B	E
278	B	D	C	D	B	D	D	B	B	A	E	D	A
279	D	D	E	D	E	D	E	B	E	A	D	C	A
280	D	D	D	D	D	C	C	C	C	B	D	C	C
281	A	B	D	A	D	A	C	A	C	B	E	A	B
282	NOT	FILLED	OUT
283	B	C	B	E	D	C	C	D	D	A	D	A	C
284	A	C	B	B	D	C	D	C	C	E	C	B	B
285	D	D	B	B	E	C	D	A	E	B	D	D	E
286	E	C	C	D	C	A	D	A	C	C	D	B	C
287	A	B	E	B	D	B	D	C	B	D	C	B	D
288	C	B	D	B	D	A	D	A	D	B	C	B	B
289	D	E	E	D	A	E	A	D	A	A	E	D	A
290	C	D	C	B	E	D	B	C	B	A	D	C	B
291	D	A	A	D	C	D	D	D	C	C	B	C	B
292	D	D	D	B	E	C	C	C	D	C	D	A	D
293	C	C	D	C	D	C	D	A	C	C	E	D	A
294	C	C	C	B	D	A	C	B	D	B	D	B	B
295	E	D	C	E	C	D	C	B	B	B	B	C	C
296	B	D	D	D	E	D	C	D	D	D	D	C	B
297	B	D	E	E	D	E	B	E	D	A	D	D	B
298	D	C	C	B	E	C	C	B	D	C	D	B	A
299	C	C	B	D	E	B	D	B	B	E	C	B	A
300	C	C	D	C	D	B	C	B	C	C	C	B	C
301	D	C	D	B	B	C	C	D	C	B	D	B	B
302	B	B	C	A	E	A	E	A	E	E	C	A	E
303	D	D	C	D	E	C	E	C	D	B	D	C	A
304	D	C	E	C	D	E	B	B	D	D	C	C	B
305	A	A	C	B	E	B	E	A	D	A	D	A	B
306	A	B	A	A	E	A	D	A	D	C	B	A	E
307	C	B	D	C	B	B	B	C	B	C	A	A	C
308	B	B	B	B	C	A	C	B	B	B	B	B	B
309	A	D	A	E	C	D	C	D	B	D	D	C	A
310	B	B	C	B	D	D	D	D	C	C	C	C	D
311	D	D	D	A	C	D	C	B	C	A	C	C	A
312	D	B	B	B	E	B	D	C	D	C	D	B	D
313	D	B	C	B	D	C	C	B	D	E	D	B	B
314	D	E	B	D	D	B	B	E	C	C	D	B	B
315	E	D	D	A	D	A	D	B	E	D	E	A	B
316	A	C	D	B	D	B	E	B	D	B	D	B	B
317	C	E	B	D	D	B	D	D	C	C	D	D	D
318	D	B	D	B	B	B	E	A	D	B	D	D	A
319	B	C	D	D	D	C	D	E	A	B	B	B	A
320	B	B	B	D	C	C	D	C	D	B	D	B	B
321	B	C	B	D	D	A	D	A	E	D	C	C	D
322	D	C	D	B	D	B	D	B	D	C	D	A	C
324	A	C	C	C	B	C	C	B	B	A	B	C	C
325	E	D	B	E	B	C	B	E	A	B	D	E	A
326	E	B	E	E	E	B	D	A	D	D	B	A	B
328	C	E	C	A	C	C	D	A	E	A	E	A	C
329	E	E	E	E	E	C	E	C	C	E	E	E	A
330	B	B	C	B	B	C	C	C	B	B	C	B	B
331	B	D	B	C	C	C	D	B	C	B	D	C	B
332	A	B	B	B	C	B	C	B	D	C	B	C	C
333	A	B	B	B	D	B	C	A	C	A	B	A	B
334	D	D	D	C	E	A	D	A	E	D	D	B	C
335	C	B	C	A	D	C	D	C	D	E	B	A	E
336	D	A	C	B	D	B	D	A	D	D	B	A	D
337	C	A	E	A	E	B	E	D	E	B	E	A	B
338	B	A	B	B	D	A	D	A	D	D	B	A	B
339	B	B	D	D	E	C	D	C	D	B	C	A	C
340	C	C	B	C	D	C	D	A	E	C	D	C	B
341	D	C	C	C	C	B	B	B	C	C	D	D	C
342	D	C	D	B	C	B	C	C	C	B	D	B	B
343	NOT	FILLED	OUT
344	A	A	A	A	D	A	D	A	D	D	C	A	D
345	A	A	D	A	C	B	E	B	C	D	A	A	D
346	E	C	D	B	C	C	B	C	D	E	E	B	A
347	C	C	C	D	C	B	B	C	B	B	B	B	C
349	C	D	B	A	B	D	C	C	E	B	B	D	A
350	C	B	B	D	B	C	E	C	E	B	B	B	B
351	D	D	C	D	E	D	E	B	A	C	E	B	E
352	D	B	E	D	D	B	A	C	C	B	D	B	A
353	D	B	E	B	C	D	E	B	D	D	B	C	B
354	C	B	A	C	D	A	D	B	D	B	B	A	C
355	E	D	E	E	C	E	E	E	E	C	E	C	A
356	B	B	C	A	E	B	B	B	D	C	D	B	D
357	E	D	C	C	C	D	A	C	D	B	A	B	A
358	B	B	B	B	D	A	D	A	D	C	B	B	D
359	C	B	B	C	D	D	D	C	D	E	B	B	C
360	C	B	D	B	C	C	C	C	B	D	B	D	B
361	D	B	D	D	D	D	D	D	D	B	D	D	B
363	MISSING	DATA
364	B	A	B	B	D	B	C	C	C	B	B	B	D
366	NOT	FILLED	OUT
368	D	B	A	A	C	A	D	A	C	C	A	B	B
369	B	C	D	D	B	D	C	D	D	B	D	A	E
370	B	C	A	A	C	C	C	B	A	C	B	B	B
371	C	C	A	A	D	C	D	B	C	C	D	B	B
372	B	C	D	C	C	D	B	C	C	B	D	B	B
373	B	A	B	A	C	B	C	C	D	C	A	C	D
374	C	A	C	A	D	A	C	A	D	B	B	B	C
375	E	B	D	D	C	B	D	B	C	B	E	D	A
376	C	C	A	C	D	E	E	A	E	C	D	E	A
378	D	C	B	D	C	A	D	D	D	E	C	A	B
379	A	C	D	C	B	D	C	B	D	B	D	D	B
380	C	B	B	D	C	A	C	B	E	B	D	A	A
381	A	A	D	A	E	A	D	A	D	E	D	A	C

## Sheet: Cannabis Use
Subject Number	Age	Marijuana Registry	Years in Registry	Years Since First Tried	Cannabis Use Frequency	Previous Use vs. Now	Previous Use Info	Intake Method	Smoking	Concentrates	Edibles	Dermal	Device	Water-filtration	Dry Smoking	Vaporizors	Dabs	Monthly Use- Flower	Monthly Use- Concentrates	Monthly Use- Edibles
116	18	0	0	5	2	Yes	Everyday	1	1	0	1	0	1	1	1	0	0	1	1	0
118	22	0	0	4	0	Yes	Daily for years	0	1	0	1	0	0	1	1	0	1	0	0	0
119	18	0	0	1	1	Same		1	1	1	0	0	1	1	0	1	0	2	2	0
121	18	0	0	0	0	Never		0	0	0	0	0	0	0	0	0	0	0	0	0
124	18	0	0	0	0	Never		0	0	0	0	0	0	0	0	0	0	0	0	0
125	18	0	0	0	0	Never		0	0	0	0	0	0	0	0	0	0	0	0	0
126	18	0	0	0	0	Never		0	0	0	0	0	0	0	0	0	0	0	0	0
130	18	0	0	2	2	Same		1	1	0	1	0	1	1	1	0	0	2	0	0
131	18	0	0	0	0	Never		0	0	0	0	0	0	0	0	0	0	0	0	0
132	19	0	0	2	0	Yes	Only tried	0	0	0	0	0	0	0	0	0	0	0	0	0
133	20	0	0	2	0	Yes	Only tried once or twice	0	0	0	0	0	0	0	0	0	0	0	0	0
136	18	0	0	3	1	Yes	1-2 Times a week	1	1	0	0	0	1	1	1	1	0	2	0	1
137	DID	NOT	FILL	OUT
138	18	0	0	2	0	Yes	Only tried	0	0	0	0	0	0	0	0	0	0	0	0	0
139	18	0	0	4	7	Same		1	1	1	1	1	1	1	1	1	1	5	2	2
140	18	0	0	3	1	Same		1	1	0	0	0	1	1	1	0	0	3	0	1
141	18	0	0	0	0	Never		0	0	0	0	0	0	0	0	0	0	0	0	0
142	18	0	0	0	0	Never		0	0	0	0	0	0	0	0	0	0	0	0	0
143	19	0	0	2	0	Yes	Only tried	0	0	0	0	0	0	0	0	0	0	0	0	0
144	19	0	0	4	7	Same		1	1	1	1	0	1	1	1	0	1	4	4	1
145	25	1	1	5	4	Yes	Few times a week, but heavier amounts	1	1	1	1	0	1	1	1	0	0	2	1	3
146	18	0	0	2	2	Same		1	1	0	0	0	1	0	1	0	0	0	0	0
147	18	0	0	0	0	Never		0	0	0	0	0	0	0	0	0	0	0	0	0
148	19	0	0	0	0	Never		0	0	0	0	0	0	0	0	0	0	0	0	0
149	18	0	0	3	0	Yes	No Longer Uses	0	0	0	0	0	0	0	0	0	0	0	0	0
150	18	0	0	3	6	Same		1	1	0	0	0	1	0	1	0	0	4	1	1
151	18	0	0	2	4	Same		1	1	1	1	0	1	1	1	0	1	2	1	3
152	18	0	0	0	0	Never		0	0	0	0	0	0	0	0	0	0	0	0	0
153	18	0	0	3	2	Yes	Used to smoke once a week	1	1	0	0	0	1	1	1	0	0	3	0	0
155	20	0	0	3	5	Yes	Used to smoke daily	1	1	0	1	0	1	1	1	1	0	2	0	1
156	18	0	0	0	0	Never		0	0	0	0	0	0	0	0	0	0	0	0	0
157	18	0	0	3	2	Yes	More than 3x per day	1	1	1	1	1	1	1	1	1	1	2	1	0
158	21	0	0	0	0	Never		0	0	0	0	0	0	0	0	0	0	0	0	0
159	20	0	0	2	0	Yes	No Longer Uses	0	0	0	0	0	0	0	0	0	0	0	0	0
161	18	0	0	1	1	Same		1	1	0	0	0	1	0	1	0	0	1	0	0
162	18	0	0	3	5	Same		1	1	1	1	0	1	1	1	1	0	3	1	1
163	18	0	0	3	4	Same		1	1	0	1	0	1	1	1	1	0	1	1	1
164	18	0	0	0	0	Never		0	0	0	0	0	0	0	0	0	0	0	0	0
165	19	0	0	0	0	Never		0	0	0	0	0	0	0	0	0	0	0	0	0
167	29	0	0	6	0	Yes	No Longer Uses	0	0	0	0	0	0	0	0	0	0	0	0	0
168	19	0	0	1	1	Same		1	1	0	1	0	1	1	1	0	0	1	0	1
169	18	0	0	1	1	Same		1	1	0	0	0	1	1	1	0	0	1	0	0
170	18	0	0	0	0	Never		0	0	0	0	0	0	0	0	0	0	0	0	0
171	18	0	0	3	2	Same		1	1	1	1	0	1	0	1	1	0	3	1	2
172	19	1	1	3	1	Same		1	1	1	1	0	1	1	1	1	0	2	1	4
173	18	0	0	0	0	Never		0	0	0	0	0	0	0	0	0	0	0	0	0
174	20	0	0	0	0	Never		0	0	0	0	0	0	0	0	0	0	0	0	0
175	18	0	0	4	2	Yes	2-4 times a day	1	1	0	1	0	1	1	1	0	0	2	0	1
176	32	0	0	0	0	Never		0	0	0	0	0	0	0	0	0	0	0	0	0
177	18	0	0	4	0	No	No Longer Uses; Used to smoke 5-8 times daily, stopped half year ago	0	1	1	0	0	0	1	1	1	1	0	0	0
178	26	0	0	6	1	Same		1	0	0	1	0	0	0	0	0	0	0	0	3
179	19	0	0	2	0	Yes	Only tried	0	1	0	1	0	0	1	1	1	0	1	0	0
180	25	0	0	6	0	Yes	No longer uses, used to use 'weekly'	0	0	0	0	0	0	0	0	0	0	0	0	0
181	18	0	0	0	0	Never		0	0	0	0	0	0	0	0	0	0	0	0	0
182	19	0	0	1	1	Same		1	1	0	0	0	0	0	0	0	0	0	0	0
184	18	0	0	4	5	Yes	Used to use 3 times a day	1	1	1	0	0	1	1	1	1	1	4	2	1
185	DID	NOT	FILL	OUT
186	18	0	0	3	3	Same		1	1	0	0	0	1	1	1	0	0	1	1	1
187	19	1	2	4	5	Same		1	1	1	1	0	1	1	1	0	1	4	1	1
188	18	0	0	0	0	Never		0	0	0	0	0	0	0	0	0	0	0	0	0
189	19	0	0	2	3	Yes	3-4 times daily	1	1	1	1	0	1	1	1	0	1	6	5	0
190	18	1	1	4	7	Same		1	1	1	1	0	1	1	1	1	1	5	2	4
191	18	0	0	3	1	Same		2	0	1	0	0	1	1	1	1	1	6	4	0
192	19	0	0	0	0	Never		0	0	0	0	0	0	0	0	0	0	0	0	0
194	19	0	0	0	0	Never		0	0	0	0	0	0	0	0	0	0	0	0	0
195	18	0	0	1	0	Never		1	1	0	0	0	1	0	1	1	0	1	0	0
196	18	0	0	2	0	Yes	1/week for 1 month	0	0	0	0	0	0	0	0	0	0	0	0	0
197	18	0	0	3	4	Same		1	1	0	0	0	1	0	1	0	0	4	0	0
198	19	0	0	3	1	Yes	weekly	1	1	0	0	0	1	1	1	0	0	1	0	0
199	18	0	0	0	0	Never		0	0	0	0	0	0	0	0	0	0	0	0	0
200	DID	NOT	FILL	OUT	NOT ATTACHED TO SURVEY
201	DID	NOT	FILL	OUT	NOT ATTACHED TO SURVEY
202	18	0	0	0	0	Never		0	0	0	0	0	0	0	0	0	0	0	0	0
203	21	0	0	5	6	Same		1	1	1	1	0	1	1	1	0	1	3	1	0
204	19	0	0	0	0	Never		0	0	0	0	0	0	0	0	0	0	0	0	0
205	18	0	0	2	2	Same		1	1	0	1	0	1	1	1	1	1	1	4	1
206	18	0	0	2	1	Yes	once a week	1	1	0	0	0	1	1	1	0	1	1	1	1
207	20	0	0	3	0	Same		0	0	0	0	0	0	0	0	0	0	0	0	0
208	19	0	0	0	0	Never		0	0	0	0	0	0	0	0	0	0	0	0	0
209	18	0	0	1	4	Never		1	1	0	0	0	1	0	1	0	0	1	0	0
209a	19	0	0	1	2	Same		1	1	0	1	0	1	1	1	0	0	2	0	0
210	18	0	0	0	0	Never		0	0	0	0	0	0	0	0	0	0	0	0	0
211	18	0	0	2	5	Yes	2-4 times a day	1	1	1	1	0	1	0	1	1	0	3	1	2
212	18	0	0	4	3	Yes	daily	1	1	0	1	0	1	1	1	0	1	4	1	2
213	21	0	0	4	7	Yes	more than 4x per day	1	1	1	0	0	1	1	0	1	0	3	1	0
214	18	0	0	0	0	Never		0	0	0	0	0	0	0	0	0	0	0	0	0
215	DID NOT FILL OUT
215a	DID NOT FILL OUT
216	17	0	0	3	2	Same		1	1	0	0	0	1	1	1	0	0	2	0	1
217	19	0	0	3	1	Same		1	1	0	1	0	1	1	1	0	0	2	1	1
218	18	0	0	0	0	Never		0	0	0	0	0	0	0	0	0	0	0	0	0
219	DID NOT FILL OUT
220	19	0	0	0	0	Never		0	0	0	0	0	0	0	0	0	0	0	0	0
221	19	0	0	4	1	Yes	daily	1	1	0	1	0	1	0	1	0	0	0	0	0
222	26	0	0	5	5	Yes	more than 4x per day	1	1	0	0	0	1	0	1	0	0	2	0	0
223	18	0	0	3	1	Same		1	1	1	0	0	1	1	1	1	0	1	0	0
224	25	0	0	5	1	Never		1	1	0	0	0	0	0	0	0	0	1	0	0
225	18	0	0	1	1	Never		0	0	0	0	0	0	0	0	0	0	0	0	0
226	19	0	0	1	2	Never		1	1	0	0	0	1	0	1	0	0	1	0	0
227	19	0	0	3	5	Yes	2 grams x week	1	1	1	1	0	1	1	1	0	1	6	5	1
228	18	0	0	2	3	Same		1	1	0	0	0	1	1	1	1	0	3	4	0
229	18	0	0	0	0	Never		0	0	0	0	0	0	0	0	0	0	0	0	0
230	20	0	0	2	5	Same		1	1	1	1	0	0	1	1	1	0	3	0	0
231	19	0	0	0	0	Never		0	0	0	0	0	0	0	0	0	0	0	0	0
232	18	0	0	0	0	Never		0	0	0	0	0	0	0	0	0	0	0	0	0
233	18	0	0	3	2	Yes	1x a week	1	1	1	1	0	1	1	1	0	1	1	1	0
234	19	0	0	2	1	Same		1	1	0	1	0	1	1	1	0	0	1	0	1
235	22	0	0	1	2	Same		1	1	0	1	0	1	0	1	1	0	2	0	3
236	19	0	0	1	1	Yes	2x a month	1	1	0	1	0	1	1	1	1	0	1	1	3
237	18	0	0	2	2	Yes	several times a day	1	1	0	1	0	1	1	1	1	1	1	0	2
239	18	0	0	0	0	Never		0	0	0	0	0	0	0	0	0	0	0	0	0
240	19	0	0	4	6	Same		1	1	1	1	0	1	1	0	0	0	2	2	1
241	19	0	0	0	0	Never		0	0	0	0	0	0	0	0	0	0	0	0	0
242	19	1	3	4	4	Yes	Everyday	1	1	0	1	1	1	1	1	1	0	3	0	2
243	18	0	0	0	0	Never		0	0	0	0	0	0	0	0	0	0	0	0	0
244	20	0	0	0	0	Never		0	0	0	0	0	0	0	0	0	0	0	0	0
245	18	1	1	2	6	Yes	more than 4x per day	1	1	1	1	0	1	1	1	0	1	3	1	1
246	18	0	0	0	0	Never		0	0	0	0	0	0	0	0	0	0	0	0	0
247	19	0	0	3	8	Same		1	1	1	1	0	1	1	1	1	1	5	1	1
249	DID NOT FILL OUT
250	22	0	0	4	5	Never		1	1	0	0	0	1	1	1	0	0	4	0	0
251	19	0	0	4	5	Yes	2-4 times a day	1	1	1	1	1	1	1	1	1	1	7	1	1
252	19	0	0	3	1	Same		1	1	0	1	0	1	1	1	0	0	1	0	0
253	18	0	0	2	2	Yes	daily	1	1	1	1	0	1	1	1	0	0	3	1	1
254	22	0	0	4	4	Same		1	1	1	1	0	1	1	0	0	1	2	1	1
255	18	0	0	0	0	Never		0	0	0	0	0	0	0	0	0	0	0	0	0
256	18	0	0	4	1	Same		1	1	1	0	0	1	0	1	0	0	1	1	0
257	18	0	0	1	1	Never		1	1	0	1	0	1	1	1	1	0	1	1	1
258	20	0	0	2	3	Different questionairre	Different questionairre	1	1	0	1	0	1	1	1	0	0	1	1	0
260	18	0	0	0	0	0		0	0	0	0	0	0	0	0	0	0	0	0	0
261	20	0	0	5	5	Different questionairre	Different questionairre	1	1	1	1	0	1	1	1	0	1	6	2	2
262	19	0	0	0	0	0		0	0	0	0	0	0	0	0	0	0	0	0	0
263	19	0	0	1	0	Yes	Only tried	0	0	0	0	0	0	0	0	0	0	0	0	0
264	18	0	0	1	0	Yes	Only tried	0	0	0	0	0	0	0	0	0	0	0	0	0
265	22	0	0	2	8	Same		1	1	1	0	0	1	1	1	1	0	3	0	0
266	21	0	0	Blank	2	Different questionairre	Different questionairre	1	1	0	1	0	1	0	0	1	0	1	0	1
267	18	0	0	2	3	Different questionairre	Different questionairre	1	1	0	0	0	1	0	0	1	0	1	0	0
268	19	0	0	3	2	Yes	3-6 times a week	1	1	0	0	0	1	1	1	0	0	2	0	0
269	18	0	0	2	7	Different questionairre		1	1	1	1	0	1	1	1	page missing	page missing	page missing	page missing	page missing
270	18	0	0	1	1	Different questionairre	Different questionairre	1	0	0	1	0	0	0	0	0	0	0	0	1
271	18	0	0	3	3	Different questionairre	Different questionairre	1	1	0	1	0	1	1	1	0	0	1	Blank	1
272	20	0	0	3	3	Different questionairre	Different questionairre	1	1	1	1	0	1	1	1	1	0	1	1	0
273	18	0	0	3	7	Different questionairre	Different questionairre	1	1	1	1	0	1	1	1	1	1	3	3	3
274	19	0	NO	MORE	ENTRIES	IN	R-CUE
275	30	0	0	6	1	Yes	No longer uses, used to 1-2 times a week	0	1	0	1	0	0	0	0	0	0	0	0	0
276	19	0	0	1	1	Same		1	1	1	1	0	1	1	1	0	0	1	1	1
277	19	0	0	4	2	Yes	Everyday	1	1	0	1	0	1	0	1	0	0	1	1	0
278	19	0	0	4	0	Yes	No longer uses, used to use once a month	0	0	0	0	0	0	0	0	0	0	0	0	0
279	21	0	0	2	7	Same		1	1	1	0	0	1	1	1	0	1	3	1	0
280	CURRENTLY	MISSING	DATA
281	22	0	0	0	0	Never		0	0	0	0	0	0	0	0	0	0	0	0	0
282	26	0	0	6	0	Yes	Used to use 10+ years ago	0	0	0	0	0	0	0	0	0	0	0	0	0
283	CURRENTLY	MISSING	DATA
284	18	0	0	0	0	Never		0	0	0	0	0	0	0	0	0	0	0	0	0
285	19	0	0	0	0	Never		0	0	0	0	0	0	0	0	0	0	0	0	0
286	19	0	0	4	0	Yes	Former use - 1-3 times a month	0	0	0	1	0	0	0	0	0	0	0	0	0
287	23	0	0	1	3			1	1	0	1	0	1	1	1	0	0	1	0	3
288	19	0	0	3	0	Yes	Only tried	0	0	0	0	0	0	0	0	0	0	0	0	0
289	18	0	0	1	1	Same		1	1	0	0	0	1	0	1	0	0	1	0	0
290	20	0	0	4	4	Same		1	1	0	1	0	1	1	1	0	0	3	0	3
291	26	0	0	1	1	Same		0	0	0	0	0	0	0	0	0	0	0	0	0
292	18	0	0	1	1	Same		1	1	0	0	0	1	1	1	0	0	2	0	0
293	40	0	0	6	5	Yes	2-4 times a day	1	1	0	1	0	1	1	1	1	0	3	1	3
294	18	0	0	1	1	Same		1	1	0	0	0	1	0	1	0	0	1	0	0
295	19	1	1	3	6	Same		1	1	1	1	0	1	1	1	1	1	4	1	1
296	18	0	0	0	0	Never		0	0	0	0	0	0	0	0	0	0	0	0	0
297	19	0	0	0	0	Never		0	0	0	0	0	0	0	0	0	0	0	0	0
298	20	0	0	4	1	Same		1	1	0	1	0	1	1	1	0	0	1	0	0
299	19	0	0	0	0	Never		0	0	0	0	0	0	0	0	0	0	0	0	0
300	19	0	0	0	0	Never		0	0	0	0	0	0	0	0	0	0	0	0	0
301	21	0	0	3	1	Same		1	1	0	0	0	1	0	1	0	0	2	2	0
302	18	0	0	0	0	Never		0	0	0	0	0	0	0	0	0	0	0	0	0
303	18	0	0	3	3	Yes	3-4 times daily	1	1	1	1	0	1	1	1	1	1	1	1	1
304	21	0	0	3	7	Same		1	1	1	1	0	1	1	0	1	1	4	2	1
305	19	0	0	3	1	Same		1	0	0	1	0	1	0	1	0	0	0	0	2
306	18	0	0	0	0	Never		0	0	0	0	0	0	0	0	0	0	0	0	0
307	19	0	0	1	1	Same		1	0	0	1	0	0	0	0	0	0	0	0	1
308	21	0	0	2	1	Same		1	0	0	1	0	1	0	0	1	0	1	1	1
309	19	0	0	0	0	Never		0	0	0	0	0	0	0	0	0	0	0	0	0
310	20	0	0	0	0	Never		0	0	0	0	0	0	0	0	0	0	0	0	0
311	19	0	0	5	2	Yes	Everyday	1	1	0	0	0	1	0	1	0	0	1	0	0
312	19	0	0	0	0	Never		0	0	0	0	0	0	0	0	0	0	0	0	0
313	21	0	0	2	2	Yes	2-4 times a day	1	1	0	1	0	1	1	1	0	1	1	0	1
314	19	0	0	3	4	Yes	Daily	1	1	1	1	0	1	1	1	1	1	3	2	2
315	MISSING	DATA
316	19	0	0	0	0	Never		0	0	0	0	0	0	0	0	0	0	0	0	0
317	20	0	0	3	1	Same		1	1	0	1	0	1	1	1	1	0	1	0	0
318	26	1	1	5	7	Same		1	1	1	0	0	1	1	1	1	1	4	3	0
319	17	0	0	0	0	Never		0	0	0	0	0	0	0	0	0	0	0	0	0
320	22	0	0	4	5	Same		1	1	0	0	0	1	1	1	0	0	3	0	0
321	25	0	3	4	6	Yes	1-3 times a day	1	1	1	1	0	1	1	1	0	1	3	2	1
322	19	0	0	2	1	Same		1	0	1	1	0	1	1	1	1	0	0	1	2
324	21	0	0	5	0	Never		0	0	0	0	0	0	0	0	0	0	0	0	0
325	20	0	0	2	6	Same		1	1	1	0	0	1	1	1	0	1	6	1	0
326	19	0	0	3	3	Yes	every day for about a month, 2 month	1	1	1	1	0	1	1	1	1	0	1	1	0
328	18	1	1	2	6	Same		1	1	1	0	0	1	1	1	0	1	4	2	0
329	23	0	0	4	2	Yes	1-2 times a day	1	1	1	1	0	1	1	1	1	1	2	1	0
330	20	0	0	4	0	Yes	couple times a day	0	0	0	0	0	0	0	0	0	0	0	0	0
331	21	0	0	3	2	Same		0	0	0	1	0	1	0	1	0	0	1	0	3
332	29	0	0	3	0	Yes	only tried	0	0	0	0	0	0	0	0	0	0	0	0	0
333	19	1	1	3	5	Same		1	1	0	0	0	1	1	1	0	0	2	0	0
334	19	0	0	2	1	Same		1	1	0	0	0	1	1	1	0	0	1	0	0
335	19	0	0	2	0	Yes	Former use every couple of months	1	1	0	0	0	0	0	0	0	0	0	0	0
336	21	0	0	2	6	Yes	2x a day	1	1	0	1	0	1	1	1	0	0	3	0	1
337	20	0	0	0	0	Never		0	0	0	0	0	0	0	0	0	0	0	0	0
338	22	0	0	5	6	Same		1	1	1	1	0	1	1	1	1	1	3	1	1
339	19	0	0	3	2	Yes	3-6 times a week	1	1	0	0	0	1	1	1	0	0	2	0	0
340	22	1	1	3	1	Yes	few times a day	1	1	1	1	0	1	1	1	1	1	2	0	0
341	19	0	0	3	2	Same		1	1	1	0	0	1	0	1	0	0	1	1	0
342	19	0	0	4		Same		1	1	1	1	0	1	1	1	1	1	3	1	1
343	22	0	0	4	2	Yes	Daily	1	1	1	1	1	1	0	1	0	0	2	2	0
344	18	0	0	3	6	Same		1	1	1	1	0	1	1	1	0	1	3	1	0
345	24	0	0	4	5	Yes	All day, every day	1	1	1	0	0	1	1	1	0	0	3	2	0
346	19	0	0	4	2	Yes	2-3 times daily	1	1	0	0	0	1	1	0	1	1	1	1	2
347	18	1	2	4	8	Same		1	1	1	1	0	1	1	1	1	1	6	3	2
349	23	0	0	4	2	Yes	3-4 times a week	1	1	0	1	0	1	0	1	0	0	2	0	2
350	19	0	0	3	2	Same		1	1	0	1	0	1	0	1	0	0	1	0	0
351	MISSING	MISSING	MISSING
352	20	0	0	1	1	Yes	Once a month, now I don't use it at all	1	0	0	1	0	0	0	0	0	0	0	0	1
353	19	0	0	3	1	Yes	Once every two weeks	1	1	0	1	0	1	1	1	0	0	1	1	1
354	19	0	0	1	1	Yes		1	1	0	0	0	1	1	1	0	0	1	0	0
355	21	0	0	5	4	Yes	Daily	1	1	1	1	0	1	1	1	0	1	3	1	0
356	18	0	0	0	0	Never		0	0	0	0	0	0	0	0	0	0	0	0	0
357	19	1	2	3	8	Same		1	1	1	1	0	1	1	1	1	1	3	4	3
358	18	0	0	0	0	Never		0	0	0	0	0	0	0	0	0	0	0	0	0
359	19	0	0	2	0	Yes	Only tried	0	0	0	0	0	0	0	0	0	0	0	0	0
360	25	1	2	4	5	Yes	Everyday	1	1	1	1	0	1	1	1	0	1	2	1	1
361	19	0	0	0	0	Never		0	0	0	0	0	0	0	0	0	0	0	0	0
363	20	0	0	4	3	Yes	Once per day	1	1	0	1	0	1	1	1	0	0	1	0	0
364	22	0	0	4	6	Same		1	1	0	0	0	1	1	1	0	0	3	0	0
366	25	0	0	6	3	Yes	Almost daily (over a year ago)	1	1	0	1	0	1	1	1	0	0	1	0	2
368	19	0	0	0	0	Never		0	0	0	0	0	0	0	0	0	0	0	0	0
369	18	0	0	4	8	Yes	6-7 times a day	1	1	1	0	0	1	1	0	1	1	4	3	1
370	22	0	0	4	4	Yes	Everyday	1	1	0	0	0	1	1	1	1	0	2	0	0
371	22	0	0	4	0	Yes	Tried a few times in highschool	0	0	0	0	0	0	0	0	0	0	0	0	0
372	19	0	0	1	1	Same		1	1	0	0	0	1	0	1	0	0	1	0	0
373	22	0	0	0	0	Never		0	0	0	0	0	0	0	0	0	0	0	0	0
374	22	0	0	4	2	Yes	A couple of times a week	1	1	0	0	0	1	1	1	0	0	1	0	0
375	19	0	0	4	2	Same		1	1	0	1	0	1	1	1	0	0	2	0	2
376	20	0	0	4	8	Yes	Dabs every two hours	1	1	1	1	0	1	1	1	0	1	4	3	1
378	18	0	0	3	6	Yes	2-4 times a day	1	1	1	1	0	1	1	1	0	1	4	1	2
379	21	0	0	2	5	Yes	Daily	1	1	0	1	0	1	0	0	1	0	3	0	1
380	18	0	0	4	5	Yes	2-4 times a day	1	1	1	1	0	1	1	1	1	1	3	2	0
381	18	0	0	0	0	Never		0	0	0	0	0	0	0	0	0	0	0	0	0

## Sheet: Use Motives
Subject Number	Q1	Q2	Q3	Q4	Q5	Q6	Q7	Q8	Q9	Q10	Q11	Q12	Q13	Q14	Q15	Q16	Q17	Q18	Q19	Q20	Q21	Q22	Q23	Q24	Q25	Q26	Q27	Q28	Q29
116	0	1	0	0	0	0	0	0	0	1	1	0	0	0	1	1	1	0	1	1	1	1	1	1	1	1	0	1	1
118	1	1	0	1	1	0	0	0	0	1	1	1	1	0	1	0	0	0	1	1	1	0	1	1	1	1	0	0	1
119	1	1	1	0	0	1	1	1	0	1	1	0	0	0	1	1	1	1	0	1	1	1	1	1	1	1	0	1	0
121	0	0	0	0	0	0	0	0	0	0	0	0	0	0	0	0	0	0	0	0	0	0	0	0	0	0	0	0	0
124	0	0	0	0	0	0	0	0	0	0	0	0	0	0	0	0	0	0	0	0	0	0	0	0	0	0	0	0	0
125	0	0	0	0	0	0	0	0	0	0	0	0	0	0	0	0	0	0	0	0	0	0	0	0	0	0	0	0	0
126	0	0	0	0	0	0	0	0	0	0	0	0	0	0	0	0	0	0	0	0	0	0	0	0	0	0	0	0	0
130	1	1	1	0	0	0	0	0	0	1	0	1	0	0	1	1	1	1	1	1	1	1	1	1	1	1	0	1	1
131	0	0	0	0	0	0	0	0	0	0	0	0	0	0	0	0	0	0	0	0	0	0	0	0	0	0	0	0	0
132	1	1	0	0	0	0	0	0	0	0	2	0	0	0	2	2	0	0	0	0	0	0	0	2	2	0	0	0	0
133	1	0	0	0	0	0	0	0	0	0	0	0	0	0	0	0	0	0	0	0	0	0	0	0	0	0	0	0	0
136	1	1	0	0	0	0	0	0	0	1	1	0	0	0	1	0	0	0	1	1	1	0	0	1	1	1	0	1	1
137	DID	NOT	FILL	OUT
138	1	1	1	0	0	1	0	1	0	0	1	1	1	1	1	1	1	1	1	1	1	0	1	1	1	1	1	1	1
139	DID	NOT	FILL	OUT
140	1	1	1	0	0	0	0	0	1	0	1	0	0	0	1	0	0	1	1	0	0	1	1	1	1	1	0	1	1
141	0	0	0	0	0	0	0	0	0	0	0	0	0	0	0	0	0	0	0	0	0	0	0	0	0	0	0	0	0
142	1	0	0	0	0	0	0	0	0	0	0	0	0	0	0	0	0	0	0	0	0	0	0	0	0	0	0	0	0
143	1	1	0	0	0	0	0	0	0	0	1	0	0	0	1	1	0	0	0	0	0	1	0	0	0	1	0	1	0
144	1	1	0	0	0	0	0	0	1	1	1	1	0	0	1	1	0	0	1	1	1	1	1	1	1	1	1	1	1
145	1	1	0	0	0	0	1	1	0	0	1	1	0	0	1	0	0	1	1	0	0	1	0	1	1	0	0	0	0
146	1	1	1	0	0	0	0	0	0	1	0	0	0	0	1	1	0	0	0	0	0	1	0	1	0	0	0	0	1
147	DID	NOT	FILL	OUT
148	0	0	0	0	0	0	0	0	0	0	0	0	0	0	0	0	0	0	0	0	0	0	0	0	0	0	0	0	0
149	1	1	0	0	0	0	0	0	0	0	0	0	0	0	1	1	0	0	0	0	1	0	0	1	0	0	0	1	0
150	1	1	1	0	0	1	1	1	0	1	1	1	0	0	1	1	1	1	1	1	1	1	1	1	1	1	0	1	0
151	1	1	0	0	0	1	0	0	0	1	1	1	0	0	1	1	0	0	1	1	0	1	0	1	1	0	0	0	0
152	0	0	0	0	0	0	0	0	0	0	0	0	0	0	0	0	0	0	0	0	0	0	0	0	0	0	0	0	0
153	1	1	0	0	0	0	0	0	0	0	0	0	0	0	1	1	0	0	0	0	0	0	0	1	0	0	0	0	0
155	0	0	0	0	0	0	0	0	0	1	1	1	1	0	1	0	0	0	0	0	0	0	0	0	1	0	1	0	0
156	1	0	0	0	0	0	0	0	0	0	0	0	0	0	0	0	0	0	0	1	0	1	0	1	0	0	0	0	0
157	0	1	0	1	1	0	0	0	0	1	1	1	0	0	1	0	0	0	0	0	0	0	0	1	1	0	0	1	1
158	0	0	0	0	0	0	0	0	0	0	0	0	0	0	0	0	0	0	0	0	0	0	0	0	0	0	0	0	0
159	1	1	1	0	0	0	0	0	0	0	0	0	0	0	1	0	0	0	0	0	1	0	0	1	0	0	0	N/A	0
161	1	1	1	0	0	0	0	0	0	0	1	0	0	0	1	1	1	1	1	1	1	1	1	1	1	1	0	0	0
162	0	1	0	0	0	1	0	1	0	1	1	1	0	0	1	1	1	1	1	1	1	1	0	1	1	N/A	1	0	0
163	0	1	1	1	0	0	0	0	0	1	1	1	0	0	1	1	0	1	1	0	1	0	1	1	1	1	1	1	1
164	0	0	0	0	0	0	0	0	0	0	0	0	0	0	0	0	0	0	0	0	0	0	0	0	0	0	0	0	0
165	0	0	0	0	0	0	0	0	0	0	0	0	0	0	0	0	0	0	0	0	0	0	0	0	0	0	0	0	0
167	DID	NOT	FILL	OUT
168	1	1	1	0	0	0	0	1	0	0	1	0	0	0	1	1	1	1	1	1	1	1	1	1	1	0	0	0	0
169	1	0	0	1	0	0	0	0	0	0	0	0	0	0	1	1	0	0	1	0	0	1	0	1	1	0	0	0	1
170	1	0	0	0	0	0	0	0	0	0	1	0	0	0	1	0	0	0	0	0	0	0	1	0	0	0	0	0	0
171	1	1	0	0	0	0	0	0	1	1	1	1	0	0	1	0	0	1	0	0	0	0	1	1	1	0	1	1	1
172	1	1	0	0	0	0	0	0	0	1	1	1	0	0	1	1	1	1	1	1	1	1	1	1	1	1	0	1	1
173	0	0	0	0	0	0	0	0	0	0	0	0	0	0	0	0	0	0	0	0	0	0	0	0	0	0	0	0	0
174	0	0	0	0	0	0	0	0	0	0	0	0	0	0	0	0	0	0	0	0	0	0	0	0	0	0	0	0	0
175	0	1	0	0	0	1	0	0	0	1	1	1	0	0	1	1	0	1	1	1	0	1	1	1	1	0	0	0	0
176	0	0	0	0	0	0	0	0	0	0	0	0	0	0	0	0	0	0	0	0	0	0	0	0	0	0	0	0	0
177	0	1	0	1	1	0	0	0	0	1	0	1	1	1	1	1	1	1	1	1	0	1	1	1	1	0	0	1	1
178	0	1	0	1	0	0	0	0	0	1	0	0	0	0	1	0	0	0	0	0	0	0	0	1	1	0	0	0	0
179	1	1	0	0	0	0	0	0	0	1	0	1	0	0	1	0	0	1	1	0	0	0	1	0	1	0	0	0	0
180	1	1	1	0	0	0	0	0	0	0	0	0	0	0	0	0	0	0	0	0	0	0	0	0	0	0	0	0	0
181	0	0	0	0	0	0	0	0	0	0	0	0	0	0	0	0	0	0	0	0	0	0	0	0	0	0	0	0	0
182	1	0	1	0	0	0	0	0	0	1	1	0	0	0	1	0	0	0	0	0	1	0	1	1	1	1	0	0	0
184	1	1	0	0	0	0	0	0	0	1	1	1	1	0	1	1	1	1	1	1	1	1	1	1	1	1	0	1	1
185	DID	NOT	FILL	OUT
186	1	1	0	0	0	0	0	0	0	0	0	0	0	0	1	0	0	0	0	0	0	0	0	1	0	0	0	0	0
187	1	1	1	0	0	1	1	1	0	1	1	1	0	0	1	1	1	1	1	1	1	1	1	1	1	1	1	1	0
188	0	0	0	0	0	0	0	0	0	0	0	0	0	0	0	0	0	0	0	0	0	0	0	0	0	0	0	0	0
189	1	1	1	1	1	0	0	0	0	1	1	1	0	1	1	1	0	1	1	1	1	1	1	1	1	1	1	1	1
190	1	1	0	1	1	1	1	1	0	1	1	1	0	0	1	BLANK	0	0	1	1	1	1	0	1	1	1	1	1	0
191	1	0	1	0	0	0	1	0	0	1	1	1	0	0	1	0	0	1	1	0	0	1	1	1	1	0	0	1	0
192	1	1	1	1	0	0	0	1	0	1	1	1	1	0	1	1	1	1	1	1	1	1	1	1	1	1	0	1	1
194	DID	NOT	FILL	OUT
195	1	1	0	0	0	0	0	0	0	0	0	0	0	0	1	1	1	1	0	0	1	1	1	1	1	1	0	0	0
196	0	0	0	0	0	0	0	0	0	0	0	0	0	0	0	0	0	0	0	0	0	0	0	0	0	0	0	0	0
197	1	1	0	0	0	0	0	0	0	1	1	1	0	0	1	0	0	0	1	1	0	1	0	1	1	0	0	0	0
198	1	1	0	0	0	0	0	0	0	0	1	0	0	0	1	1	0	1	0	1	0	1	1	1	1	1	0	1	0
199	DID	NOT	FILL	OUT
200	DID	NOT	FILL	OUT	NOT ATTACHED TO SURVEY
201	DID	NOT	FILL	OUT	NOT ATTACHED TO SURVEY
202	1	0	0	0	0	0	0	0	0	0	0	0	0	0	0	0	0	0	0	0	0	0	0	0	0	0	0	0	0
203	1	1	0	1	0	1	1	1	0	1	1	1	1	0	1	1	1	1	1	1	1	1	1	1	1	1	0	1	1
204	0	0	0	0	0	0	0	0	0	0	0	0	0	0	0	0	0	0	0	0	0	0	0	0	0	0	0	0	0
205	1	1	0	0	0	1	0	0	0	1	1	1	0	0	1	0	0	0	1	0	1	0	0	1	1	1	0	1	0
206	1	1	1	0	0	0	0	0	0	0	0	0	0	0	1	1	1	0	1	0	1	0	0	1	1	1	0	0	0
207	0	0	0	0	0	0	0	0	0	0	0	0	0	0	0	0	0	0	0	0	0	0	0	0	0	0	0	0	0
208	0	0	0	0	0	0	0	0	0	0	0	0	0	0	0	0	0	0	0	0	0	0	0	0	0	0	0	0	0
209	1	1	0	0	0	0	0	0	0	0	1	0	0	0	1	1	0	0	0	0	1	1	0	1	1	1	0	1	1
209A	1	1	1	0	0	0	0	0	0	0	1	0	0	0	1	1	0	1	1	0	1	1	0	1	1	1	0	1	0
210	0	0	0	0	0	0	0	0	0	0	0	0	0	0	0	0	0	0	0	0	0	0	0	0	0	0	0	0	0
211	1	1	0	0	0	0	0	0	0	1	1	1	0	0	1	1	0	0	1	0	1	1	1	1	1	1	0	1	0
212	0	1	0	0	1	1	1	1	0	1	1	1	1	0	1	0	0	1	1	0	0	0	1	1	1	0	0	1	0
213	0	0	0	0	0	1	1	1	YES AND NO	1	1	1	0	0	1	1	0	1	YES AND NO	1	0	0	0	0	1	0	0	0	0
214	0	0	0	0	0	0	0	0	0	0	0	0	0	0	0	0	0	0	0	0	0	0	0	0	0	0	0	0	0
215	DID	NOT	FILL	OUT
215A	DID	NOT	FILL	OUT
216	1	1	0	1	0	0	0	0	0	1	0	0	0	0	1	1	0	0	1	0	0	1	0	1	1	1	0	0	0
217	1	1	1	0	0	0	0	0	1	1	1	1	0	0	1	1	0	1	1	1	1	1	1	1	1	1	1	1	1
218	0	0	0	0	0	0	0	0	0	0	0	0	0	0	0	0	0	0	0	0	0	0	0	0	0	0	0	0	0
219	DID	NOT	FILL	OUT
220	1	1	0	0	0	0	0	0	0	0	1	0	0	0	0	1	0	0	1	0	0	1	0	1	0	0	0	0	0
221	1	1	0	0	0	0	0	0	0	0	0	1	0	0	1	0	0	0	0	0	0	0	0	1	0	0	0	0	0
222	0	1	0	0	0	1	0	0	0	0	0	0	0	0	1	0	0	0	1	1	0	0	1	1	1	0	0	0	0
223	1	1	0	0	0	1	1	1	0	1	1	1	0	0	1	1	1	0	1	1	1	1	1	1	1	1	0	1	0
224	1	1	0	0	0	0	0	0	0	1	0	0	0	0	1	1	0	0	1	1	0	1	0	1	1	1	0	1	0
225	0	0	0	0	0	0	0	0	0	0	0	0	0	0	0	1	0	0	0	0	1	0	0	1	0	0	0	0	0
226	1	1	1	0	0	0	0	0	0	0	0	0	0	0	1	0	0	0	0	0	1	0	0	1	1	0	0	0	0
227	1	1	0	0	0	0	0	0	0	1	1	1	0	0	1	1	0	0	1	1	0	1	1	1	1	1	0	1	0
228	1	1	1	1	1	0	0	0	0	1	1	1	1	1	1	1	1	1	1	1	0	1	1	1	1	1	0	1	1
229	0	0	0	0	0	0	0	0	0	0	0	0	0	0	0	0	0	0	0	0	0	0	0	0	0	0	0	0	0
230	1	1	1	0	0	1	1	1	0	0	1	1	0	0	1	0	0	0	1	1	0	1	1	1	1	0	0	1	0
231	0	0	0	0	0	0	0	0	0	0	0	0	0	0	0	0	0	0	0	0	0	0	0	0	0	0	0	0	0
232	0	0	0	0	0	0	0	0	0	0	0	0	0	0	0	0	0	0	0	0	0	0	0	0	0	0	0	0	0
233	1	1	0	0	0	1	1	1	0	1	1	1	0	0	1	1	0	0	1	1	0	1	0	1	1	1	0	1	1
234	1	1	0	0	0	0	0	0	0	0	0	0	0	0	1	0	0	0	1	0	0	0	0	1	1	1	0	1	0
235	1	1	0	0	0	0	0	0	0	0	0	0	0	0	1	1	0	0	1	1	0	1	0	1	1	1	0	0	1
236	1	1	0	0	0	0	0	0	0	0	0	0	0	0	1	1	0	0	1	0	1	0	0	1	1	1	0	1	1
237	0	1	0	1	1	0	0	0	0	1	1	1	0	1	1	0	0	1	1	0	1	0	1	1	1	1	0	1	1
238	1	1	0	0	0	0	0	0	0	1	1	1	0	0	1	1	0	0	1	0	0	1	1	1	1	0	0	0	1
239	0	0	0	0	0	0	0	0	0	0	0	0	0	0		0	0	0	0	0	0	0	0	0	0	0	0	0	0
240	1	1	0	0	1	1	0	0	0	1	1	1	0	1	1	1	1	1	0	1	1	1	1	1	1	1	1	1	1
241	0	0	0	0	0	0	0	0	0	0	0	0	0	0	0	0	0	0	0	0	0	0	0	0	0	0	0	0	0
242	0	1	0	0	0	0	0	1	0	1	0	1	0	0	1	1	1	0	1	1	1	1	1	1	1	1	0	0	1
243	0	0	0	0	0	0	0	0	0	0	0	0	0	0	0	0	0	0	0	0	0	0	0	0	0	0	0	0	0
244	0	0	0	0	0	0	0	0	0	0	0	0	0	0	0	0	0	0	0	0	0	0	0	0	0	0	0	0	0
245	1	1	0	1	1	0	0	0	0	1	1	1	0	0	1	0	0	1	1	1	1	1	1	1	1	1	1	1	1
246	0	0	0	0	0	0	0	0	0	0	0	0	0	0	0	0	0	0	0	0	0	0	0	0	0	0	0	0	0
247	0	1	0	0	0	1	0	0	0	1	1	1	0	0	1	1	1	1	1	1	1	1	1	1	1	1	0	0	0
249	DID	NOT	FILL	OUT
250	1	1	0	1	1	0	0	0	0	1	1	0	0	0	1	0	0	0	1	0	0	0	0	1	1	0	1	0	0
251	1	1	0	0	0	1	1	1	0	1	1	0	0	0	1	1	1	1	1	1	1	1	0	1	1	1	0	1	1
252	1	1	0	0	0	0	0	0	0	0	0	0	0	0	1	1	0	0	1	0	1	1	1	1	1	1	0	1	0
253	1	1	0	0	0	0	0	0	0	1	1	1	0	0	1	0	0	1	1	0	1	0	1	1	1	0	0	1	1
254	1	1	0	0	0	0	0	0	0	1	1	1	0	0	1	1	0	1	1	0	0	0	0	1	1	0	0	0	0
255	1	1	0	0	0	1	1	1	1	1	1	1	0	1	1	1	0	0	1	0	0	0	0	1	1	1	0	0	0
256	0	1	1	0	0	0	0	0	0	0	0	0	0	0	1	1	0	0	1	1	1	1	0	1	0	1	0	1	0
257	1	1	1	0	0	0	0	0	0	0	0	0	0	0	1	1	0	0	0	0	0	1	0	1	1	1	0	0	0
258	1	1	1	0	0	0	0	0	0	0	0	0	0	0	1	0	0	0	1	1	1	1	0	1	1	1	0	0	0
260	0	0	0	0	0	0	0	0	0	0	0	0	0	0	0	0	0	0	0	0	0	0	0	0	0	0	0	0	0
261	DID	NOT	FILL	NOT ATTACHED TO SURVEY
262	0	0	0	0	0	0	0	0	0	0	0	0	0	0	0	0	0	0	0	0	0	0	0	0	0	0	0	0	0
263	0	0	0	0	0	0	0	0	0	0	0	0	0	0	0	0	0	0	0	0	0	0	0	0	0	0	0	0	0
264	1	1	0	0	0	0	0	0	1	1	1	1	0	0	1	1	0	0	0	0	0	0	0	1	1	1	0	1	1
265	1	1	0	0	0	0	0	0	0	0	0	0	0	0	1	0	0	0	1	1	0	0	0	1	1	1	0	0	0
266	1	1	0	0	0	0	0	0	0	0	0	0	0	0	1	0	0	0	0	0	0	0	0	0	1	0	0	0	0
267	1	1	0	0	0	1	1	1	1	1	1	0	0	0	1	1	1	1	0	1	1	1	1	1	1	1	0	1	0
268	1	1	0	0	0	0	0	0	0	1	0	0	0	0	1	0	0	0	0	1	0	0	0	1	1	0	0	0	0
269	1	0	0	0	0	0	0	0	1	1	1	1	0	0	1	0	1	0	1	1	0	0	0	1	1	1	0	1	0
270	1	0	0	0	0	0	0	0	0	0	0	0	0	0	0	0	0	0	0	0	0	0	0	1	0	0	0	0	0
271	0	0	0	0	0	0	0	0	0	0	1	0	0	0	1	1	0	0	0	1	0	1	0	1	1	0	0	0	0
272	1	1	0	0	0	0	0	1	0	0	0	0	0	0	1	1	0	1	1	1	0	1	1	1	1	1	0	1	0
273	0	1	0	1	0	1	0	1	0	1	1	1	1	1	1	1	1	1	1	1	1	1	1	1	1	1	1	1	0
274	NO	RESPONSES	ENTERED
275	NOT	FILLED	OUT
276	1	1	0	0	0	0	0	0	1	1	1	1	0	0	0	1	0	1	1	1	0	0	1	1	1	0	0	0	0
277	1	1	1	0	0	1	0	0	0	1	1	1	0	0	1	1	1	1	1	1	1	1	1	1	1	1	0	1	1
278	1	1	0	0	0	0	0	0	0	0	0	0	0	0	0	0	0	0	0	0	0	0	0	0	0	0	0	0	0
279	1	1	1	0	0	1	1	1	0	1	1	1	1	0	1	1	0	1	1	1	1	1	1	1	1	1	0	1	1
280	CURRENTLY	MISSING	DATA
281	0	0	0	0	0	0	0	0	0	0	0	0	0	0	0	0	0	0	0	0	0	0	0	0	0	0	0	0	0
282	0	0	0	0	0	0	0	0	0	0	0	0	0	0	0	0	0	0	0	0	0	0	0	0	0	0	0	0	0
283	CURRENTLY	MISSING	DATA
284	NOT	FILLED	OUT
285	0	0	0	0	0	0	0	0	0	0	0	0	0	0	0	0	0	0	0	0	0	0	0	0	0	0	0	0	0
286	1	1	0	0	0	0	0	0	0	1	1	0	0	0	0	0	0	0	0	0	0	0	0	0	0	0	0	0	0
287	1	1	0	0	0	0	0	0	0	0	0	0	0	0	1	1	1	1	1	1	1	1	0	1	1	1	0	1	1
288	NOT	FILLED	OUT
289	1	1	0	0	0	0	0	0	0	0	0	0	0	0	1	0	0	0	1	0	1	0	0	1	1	0	0	1	0
290	0	1	1	1	1	0	0	0	0	0	0	0	0	0	1	1	0	1	1	0	0	1	0	1	1	1	0	1	0
291	NOT	FILLED	OUT
292	1	1	0	0	0	0	0	0	0	1	1	0	0	0	1	0	1	1	1	1	1	1	0	1	1	1	0	1	0
293	NOT	FILLED	OUT
294	0	1	0	0	0	0	0	0	0	1	1	1	0	0	0	0	0	1	0	1	1	1	1	1	1	1	0	0	0
295	0	1	0	0	0	1	0	0	0	1	1	1	0	0	1	1	1	1	1	1	1	1	1	1	1	1	0	1	1
296	0	0	0	0	0	0	0	0	0	0	0	0	0	0	0	0	0	0	0	0	0	0	0	0	0	0	0	0	0
297	1	0	0	0	0	0	0	0	0	0	1	0	0	0	1	0	1	1	1	1	1	1	1	1	1	1	0	0	0
298	1	1	0	0	0	0	0	0	0	0	0	0	0	0	1	0	0	0	0	0	0	1	1	0	1	1	0	1	1
299	1	0	0	0	0	0	0	0	0	0	0	1	0	0	0	0	0	0	0	0	0	0	0	0	0	1	0	1	0
300	0	0	0	0	0	0	0	0	0	0	0	0	0	0	0	0	0	0	0	0	0	0	0	0	0	0	0	0	0
301	1	1	1	0	0	0	0	0	0	0	1	0	0	0	1	0	1	0	1	0	1	0	1	1	1	0	0	1	1
302	0	0	0	0	0	0	0	0	0	0	0	0	0	0	0	0	0	0	0	0	0	0	0	0	0	0	0	0	0
303	0	1	1	0	0	1	1	0	1	1	1	1	0	0	1	1	1	1	1	1	0	1	1	1	1	1	1	1	0
304	1	1	0	0	0	1	0	0	0	1	0	1	0	0	1	1	0	0	1	1	0	1	1	1	1	1	0	1	0
305	1	1	0	0	0	0	0	0	0	1	1	0	0	0	1	0	0	1	0	1	0	1	1	1	1	1	0	1	1
306	0	0	0	0	0	0	0	0	0	0	0	0	0	0	0	0	0	0	0	0	0	0	0	0	0	0	0	0	0
307	1	0	0	0	0	0	1	1	0	1	1	1	0	0	1	1	0	1	1	1	0	0	0	1	1	0	0	0	0
308	1	1	0	0	0	0	0	0	0	0	0	0	0	0	1	1	0	0	1	0	1	1	1	1	1	0	0	1	0
309	0	0	0	0	0	0	0	0	0	0	0	0	0	0	0	0	0	0	0	0	0	0	0	0	0	0	0	0	0
310	0	0	0	0	0	0	0	0	0	0	0	0	0	0	0	0	0	0	0	0	0	0	0	0	0	0	0	0	0
311	NOT	FILLED	OUT
312	0	0	0	0	0	0	0	0	0	0	0	0	0	0	0	0	0	0	0	0	0	0	0	0	0	0	0	0	0
313	1	1	0	0	0	1	0	0	0	0	0	1	0	0	1	0	0	1	1	0	0	1	1	1	1	0	0	1	1
314	0	1	1	0	1	0	0	0	0	1	1	1	0	0	1	1	0	1	1	1	1	1	1	1	1	1	1	1	1
315	MISSING	DATA
316	1	0	1	0	0	0	0	0	0	0	0	0	0	0	0	0	0	0	0	0	0	0	1	0	0	0	0	0	0
317	1	1	0	0	0	1	0	0	0	1	1	0	0	0	1	1	1	1	1	1	1	1	1	1	1	0	1	0	0
318	1	0	0	0	0	1	0	0	0	1	1	1	0	0	1	1	0	0	0	1	1	1	0	1	1	0	0	1	0
319	0	0	0	0	0	0	0	0	0	0	0	0	0	0	0	0	0	0	0	0	0	0	0	0	0	0	0	0	0
320	0	1	0	0	0	1	0	0	0	0	1	0	0	0	1	0	0	0	1	1	0	1	0	1	1	0	0	1	1
321	0	1	0	0	0	0	0	0	0	1	1	1	0	0	1	1	0	0	1	1	1	1	0	1	1	1	1	1	0
322	1	0	0	0	0	0	0	0	0	0	1	0	0	0	1	0	1	1	1	0	1	0	0	1	1	1	0	1	1
324	0	0	0	0	0	0	0	0	0	0	0	0	0	0	0	0	0	0	0	0	0	0	0	0	0	0	0	0	0
325	0	1	0	0	0	1	0	0	0	1	1	0	0	0	1	1	0	1	1	1	0	1	0	1	1	0	0	0	0
326	NOT	FILLED	OUT
328	1	1	1	0	0	1	0	0	0	1	1	1	0	0	1	1	0	1	1	1	1	1	0	1	1	1	0	1	0
329	1	1	1	0	0	1	0	0	0	1	1	1	0	0	1	1	1	1	1	1	1	1	1	1	1	1	0	1	0
330	0	0	0	0	0	0	0	0	0	0	0	0	0	0	0	0	0	0	0	0	0	0	0	0	0	0	0	0	0
331	1	1	0	0	0	0	0	0	0	1	1	0	0	0	1	0	0	0	1	0	0	0	1	1	1	0	0	0	0
332	0	1	0	0	0	0	0	0	0	1	1	1	1	1	1	1	1	1	1	0	1	1	1	1	1	0	0	0	0
333	0	0	0	0	0	0	0	0	0	1	1	1	0	0	1	0	0	1	1	1	0	1	0	0	1	0	0	0	0
334	NOT	FILLED	OUT
335	1	0	1	0	0	0	0	0	0	0	0	0	0	0	0	0	0	0	0	0	1	0	0	1	1	0	0	0	0
336	1	1	0	0	1	0	0	0	0	1	1	0	0	0	1	1	0	0	0	1	0	1	0	1	1	1	0	1	0
337	0	0	0	0	0	0	0	0	0	0	0	0	0	0	0	0	0	0	0	0	0	0	0	0	0	0	0	0	0
338	NOT	FILLED	OUT
339	1	1	0	0	0	0	0	0	0	1	1	1	0	0	1	0	0	0	1	0	0	1	0	1	1	0	0	0	0
340	1	1	1	0	0	0	0	0	0	1	1	1	0	1	1	0	0	1	1	0	0	0	1	1	1	0	0	1	0
341	NOT	FILLED	OUT
342	1	1	1	0	0	0	0	1	0	0	0	1	0	0	1	0	0	1	1	1	0	1	0	1	1	1	0	1	0
343	0	1	0	0	0	1	1	1	0	0	0	1	0	0	1	1	0	0	1	1	0	1	0	1	1	0	0	1	1
344	1	1	0	0	0	1	0	0	0	1	0	1	0	0	1	1	N/A	0	1	1	1	1	0	1	1	1	0	1	1
345	NOT	FILLED	OUT
346	0	1	0	0	0	0	0	0	0	1	1	0	0	0	1	0	0	0	1	1	0	1	0	1	1	1	0	0	0
347	1	1	0	0	0	0	0	0	0	0	0	1	0	0	1	0	0	0	1	1	0	1	0	1	1	1	0	0	0
349	0	1	0	0	0	0	0	0	0	0	0	0	0	0	1	0	0	0	1	0	1	1	0	1	1	0	0	0	0
350	1	1	0	0	0	0	0	0	0	1	1	1	0	0	1	0	0	0	1	1	0	1	0	1	1	1	0	0	0
351	MISSING	MISSING	MISSING
352	1	1	0	0	0	0	0	0	0	0	0	0	0	0	1	0	0	0	1	0	0	0	0	1	1	1	0	0	0
353	1	1	1	0	0	0	0	0	0	1	1	0	0	0	1	1	0	1	0	1	1	1	1	1	1	1	1	1	1
354	1	1	0	0	0	0	0	0	0	0	0	0	0	0	1	0	0	0	0	0	0	0	0	1	0	0	0	1	0
355	1	1	1	0	0	0	0	0	0	1	1	1	0	0	1	1	0	0	1	1	0	1	1	1	1	1	0	1	1
356	0	0	0	0	0	0	0	0	0	0	0	0	0	0	0	0	0	0	0	0	0	0	0	0	0	0	0	0	0
357	1	1	0	0	0	0	0	0	0	1	1	1	0	0	1	1	1	1	1	1	1	1	1	1	1	1	0	1	1
358	0	0	0	0	0	0	0	0	0	0	0	0	0	0	0	0	0	0	0	0	0	0	0	0	0	0	0	0	0
359	NOT	FILLED	OUT
360	1	1	0	0	0	1	0	0	0	1	1	1	0	0	1	1	0	1	1	1	1	1	0	1	1	0	0	0	0
361	0	0	0	0	0	0	0	0	0	0	0	0	0	0	0	0	0	0	0	0	0	0	0	0	0	0	0	0	0
363	1	1	0	0	0	0	1	1	0	0	1	0	0	0	1	1	1	1	1	0	1	1	1	1	1	1	0	1	1
364	0	1	0	0	0	0	0	0	0	0	0	0	0	0	1	0	0	0	0	0	0	0	0	1	1	0	0	0	0
366	0	1	0	0	0	1	1	1	0	1	1	1	0	0	1	1	1	1	1	1	1	1	0	1	1	1	1	0	0
368	0	0	0	0	0	0	0	0	0	0	0	0	0	0	0	0	0	0	0	0	0	0	0	0	0	0	0	0	0
369	0	1	0	1	1	1	0	1	0	1	1	0	0	0	1	1	0	1	1	0	0	1	1	1	1	0	0	0	0
370	0	0	0	0	0	0	0	0	0	1	0	0	0	0	1	0	0	0	0	0	0	0	1	0	1	0	0	0	0
371	1	0	0	0	0	0	0	0	0	0	0	0	0	0	1	0	0	0	0	0	0	1	0	1	1	0	0	1	0
372	1	1	1	0	0	0	0	0	0	0	1	1	0	0	1	0	0	0	1	0	1	0	1	1	1	1	0	1	1
373	0	0	0	0	0	0	0	0	0	0	0	0	0	0	0	0	0	0	0	0	0	0	0	0	0	0	0	0	0
374	0	1	0	0	0	0	0	0	0	0	0	0	0	0	1	0	0	0	1	0	0	1	0	1	1	0	0	1	0
375	1	1	1	0	0	0	0	0	0	1	1	1	0	0	1	0	0	0	1	1	0	1	0	1	1	0	0	1	0
376	1	1	0	0	0	1	0	0	0	1	1	0	0	1	1	1	0	1	1	1	1	1	0	1	1	1	0	1	0
378	1	1	0	0	0	0	1	0	0	1	0	1	0	0	1	1	1	1	1	1	1	1	1	1	1	1	1	1	1
379	NOT	FILLED	OUT
380	1	1	0	0	0	1	0	1	0	1	0	1	0	0	1	1	1	0	1	1	1	1	0	1	1	1	0	1	0
381	0	0	0	0	0	0	0	0	0	0	0	0	0	0	0	0	0	0	0	0	0	0	0	0	0	0	0	0	0

## Sheet: PCL-5
Participant Number	Identification of Event	Time Passed	Involve Actual or Threatened Trauma	Type of Experience	Type of Experience Info	Accident/Violence or Natural	Q1	Q2	Q3	Q4	Q5	Q6	Q7	Q8	Q9	Q10	Q11	Q12	Q13	Q14	Q15	Q16	Q17	Q18	Q19	Q20	Total	Cluster B	Cluster C	Cluster D	Cluster E
157	Sexual violence	2 Years	1	1		0	1	0	0	3	3	3	4	4	4	4	4	2	0	0	0	0	1	0	0	0	33	7	7	18	1
158 Poss	Wildfire	4 Years	0	2,3,5	Threatened home/family while away	0	1	1	0	3	1	2	0	0	0	0	0	1	2	1	0	0	3	3	2	3	23	6	2	4	11
159	Sexual violence	1 Year + 2 months	1	1		0	2	0	1	3	1	3	0	0	2	2	3	0	1	2	0	0	1	1	3	1	26	7	3	10	6
161	Friend experinced sexual violence	2 Weeks	1	3		0	3	0	2	3	0	2	3	1	3	1	2	0	1	1	0	2	0	0	2	0	26	8	5	9	4
162	Sexual violence	6 Months/3 Years	1	1		0	1	1	1	1	1	2	0	0	0	0	0	0	0	1	0	0	1	N/A	1	2	12	5	2	1	4
163	Sexual violence	2 Years	1	1		0	2	0	3	3	3	3	1	2	3	4	3	3	3	4	1	N/A	3	4	4	2	51	11	4	22	14
164	Car Accident	4 Years	0	1		0	0	0	0	0	0	0	0	0	0	0	0	0	0	0	0	0	0	0	0	0	0	0	0	0	0
165	Friend Died	2 Years	1	3		1	1	0	1	3	3	2	1	0	0	0	2	0	0	0	0	0	0	1	0	0	14	8	3	2	1
167	Military Service (Navy)	5 Years	1	4		0	0	0	0	0	0	0	0	0	0	0	0	0	0	0	0	0	0	0	0	1	1	0	0	0	1
168	Friend killed in car accident	2-3 Years	1	5	Found out about it	1	0	0	0	1	0	1	1	0	0	0	0	0	1	2	0	0	1	1	0	0	8	1	2	3	2
169	Sexual violence	10 Years	1	1		0	2	2	2	4	3	3	4	4	4	4	4	2	3	3	3	4	4	4	4	4	67	13	7	24	23
170	Friend attempted suicide	3 Years	1	3		0	1	0	0	3	1	2	0	0	0	1	0	0	0	0	0	0	3	0	0	0	11	5	2	1	3
171	Sexual violence	5 Years	1	1		0	2	0	3	3	1	3	3	3	1	4	3	0	0	1	2	1	3	2	2	2	39	9	6	12	12
172	CAN'T FIND/DID NOT FILL OUT																											0	0	0	0
173	Attempted Suicide	7 Years	1	1		0	2	1	3	4	4	2	2	3	2	3	3	0	1	3	2	0	3	2	2	2	44	14	4	15	11
174	Man nearly drowned	2 years	1	2		0	0	1	0	0	1	0	0	0	0	0	0	0	0	0	0	0	1	0	0	0	3	2	0	0	1
175	Rape	8 months	1	1		0	3	3	2	3	2	4	4	1	3	4	3	1	3	1	1	1	4	4	4	4	55	13	8	16	18
176	2001-09-11	14 years	1	2		1	1	1	2	2	2	2	2	0	1	1	2	2	1	1	1	1	3	4	4	4	37	8	4	8	17
177	Sisters overdose	1 week	1	3		0	0	0	0	1	1	0	0	0	1	1	1	0	0	0	1	0	0	0	1	0	7	2	0	3	2
178	Witnessed Motercycle accedent	1 Month	1	2		0	1	0	0	1	0	0	0	0	2	1	1	0	0	0	1	0	1	0	0	2	10	2	0	4	4
179	Repeated Sexual Abuse	5 Years	1	1,2		0	3	4	0	2	3	3	1	0	0	0	0	0	2	0	1	0	0	0	1	3	23	12	4	2	5
180	Combat/Firefight	3 years	1	1,2		0	1	0	1	0	1	3	2	0	0	0	2	0	1	0	3	0	4	2	0	1	21	3	5	3	10
181	Grandpa's Death	8 years	1	3		2	0	0	0	2	0	0	0	0	0	0	0	0	0	0	0	0	0	0	0	0	2	2	0	0	0
182	Death of a Mentor	3 years	1	3		2	1	1	1	2	1	3	3	0	0	0	0	2	0	1	0	0	0	0	0	0	15	6	6	3	0
184	Mother's Death	11 Years	1	1		2	1	0	2	2	1	2	2	3	1	0	1	0	1	3	2	2	1	1	2	1	28	6	4	9	9
186	Suicide	4 Years	1	3		1	0	0	0	0	0	0	0	0	0	0	0	0	0	0	0	0	0	0	0	0	0	0	0	0	0
187	My Friends Car Accident	2 Years	1	3		1	4	2	4	4	4	3	3	4	4	4	1	4	4	4	4	2	4	4	4	4	71	18	6	25	22
188	My mom going into shock after bleeding out	3 Years	1	2		0	0	0	0	1	0	1	0	0	2	2	2	0	0	0	0	0	1	0	0	0	9	1	1	6	1
189	Acute Rape, Emotional and Physical Abuse, Abortion, Death threat, Stalking, Starvation, Captivity, Abandonment		1	1		0	3	1	3	2	2	3	3	0	2	4	3	0	2	1	0	3	3	4	4	2	45	11	6	12	16
190	Mom's Suicide Attempt	6 years	1	2,3		0	0	0	0	0	0	3	3	0	0	0	0	0	0	0	0	0	2		0	3	11	0	6	0	5
191	Car Accident	2 weeks	1	1		0	0	0	0	2	0	2	0	0	0	0	0	0	0	0	0	2	1	0	0	3	10	2	2	0	6
192	CAN'T FIND/DID NOT FILL OUT					1	0	0	0	0	0	0	0	0	0	0	0	0	0	0	0	0	0	0	0	1	1	0	0	0	1
194	CAN'T FIND/DID NOT FILL OUT																											0	0	0	0
195	CAN'T FIND/DID NOT FILL OUT																											0	0	0	0
196	suicide	1 year	1	3																							0	0	0	0	0
197	trial with stepdad	2-3 years	1	1			1	0	0	2	2	3	3	0	1	1	2	0	0	0	0	0	3	2	0	0	20	5	6	4	5
198	Car Accident	2 years	1	3		1	1	0	1	3	0	1	0	0	0	0	0	0	0	0	1	0	0	0	0	0	7	5	1	0	1
199	Car Accident	6 months	1	1		1	2	2	2	2	3	0	1	3	2	3	2	1	0	0	1	0	2	2	1	0	29	11	1	11	6
200	CAN'T FIND/DID NOT FILL OUT																											0	0	0	0
201	dad getting cancer	1 Month	0	2,3		2	1	0	0	2	1	0	0	0	0	0	1	0	0	1	0	0	0	0	0	0	6	4	0	2	0
																												0	0	0	0
202	Suicide	4 Years	1	3		1	2	0	0	3	0	1	1	1	1	0	1	0	2	0	0	0	1	0	1	1	15	5	2	5	3
203	break up	3 years	0	1		0	2	1	0	1	0	4	3	0	4	2	1	0	4	4	1	3	4	1	3	4	42	4	7	15	16
204	CAN'T FIND/DID NOT FILL OUT																											0	0	0	0
205	CAN'T FIND/DID NOT FILL OUT																											0	0	0	0
206	electrocuted	5 months	1	1		1	3	0	0	3	2	2	3	1	2	0	2	3	3	2	2	0	0	0	4	4	36	8	5	13	10
207	attacked by pit bull	12 years	1	1		0	0	0	0	0	0	0	0	0	0	0	0	0	0	0	0	0	0	0	0	0	0	0	0	0	0
208	CAN'T FIND/DID NOT FILL OUT																											0	0	0	0
209	Sexual violence	5 months	1	1		0	3	0	3	4	2	4	4	4	3	3	2	0	2	3	0	3	0	2	2	2	46	12	8	17	9
209a	suicide of friend	1.5 years	1	3		1	1	0	0	2	0	0	2	0	0	0	0	0	0	0	0	1	2	0	0	0	8	3	2	0	3
210	CAN'T FIND/DID NOT FILL OUT																											0	0	0	0
211	family friend died	3 years	1	3		2	0	0	0	0	0	1	0	0	1	0	0	0	0	0	1	0	1	0	0	1	5	0	1	1	3
212	CAN'T FIND/DID NOT FILL OUT																											0	0	0	0
213	multiple near death experiences	last one 1 year 6 months	0	1		0	2	0	2	4	3	1	2	0	0	0	1	1	2	1	0	3	1	0	2	2	27	11	3	5	8
214	death of a relative	1 year	1	5	family (should probably actually be 3)	2	0	0	0	0	0	0	0	0	0	0	0	0	0	0	0	0	0	0	0	0	0	0	0	0	0
215	CAN'T FIND/DID NOT FILL OUT																											0	0	0	0
215A	CAN'T FIND/DID NOT FILL OUT																											0	0	0	0
216	CAN'T FIND/DID NOT FILL OUT																											0	0	0	0
217	Sexual violence	1 year	1	1		0	2	2	3	3	3	3	2	1	2	1	3	1	1	1	1	2	2	1	1	1	36	13	5	10	8
218	Sexual violence	4 Years	1	1		0	1	1	0	1	1	0	2	2	3	3	3	1	1	0	1	0	4	2	0	2	28	4	2	13	9
219	suicide	2 years	1	3		1	1	1	1	2	2	2	2	1	1	0	0	0	0	0	1	0	0	0	0	0	14	7	4	2	1
220	Friend suicide attempt	2 weeks	1	3		0	1	0	0	1	0	2	1	1	0	0	0	0	0	0	0	0	2	0	1	1	10	2	3	1	4
221	chased by muggers	5 years	1	1		0	0	2	1	0	3	0	0	0	0	0	0	0	0	0	0	0	0	0	0	0	6	6	0	0	0
222	family friend suicide	less than a year	1	3		1	1	0	0	1	0	2	2	0	1	0	2	1	1	2	2	0	1	0	1	1	18	2	4	7	5
223	broken bone	4 months	1	1		0	2	1	0	3	1	2	1	2	0	4	3	2	1	0	0	1	3	3	2	1	32	7	3	12	10
224	wasp sting	3 years	1	1		0	1	0	1	0	0	0	0	0	2	0	1	0	3	1	0	1	3	0	0	0	13	2	0	7	4
225	Car Accident	3 months	0	1		0	4	0	1	4	3	3	2	0	2	3	1	1	0	2	2	1	0	0	1	0	30	12	5	9	4
226	aunt's suicide	less than a year	1	3		1	1	0	0	1	0	1	1	0	1	0	2	0	0	0	0	0	0	0	0	0	7	2	2	3	0
227	attacked by dog	7 years	0	1		0	1	0	0	1	1	1	0	0	2	2	1	0	0	1	0	2	1	0	2	2	17	3	1	6	7
228	parents divorce	5 Years	0	3		0	1	0	1	0	1	1	1	1	0	0	0	0	0	0	0	0	0	0	0	0	6	3	2	1	0
229	dad heart attack	less than a year	1	3		0	2	1	1	3	1	4	2	0	2	2	2	1	1	1	1	1	0	1	2	2	30	8	6	9	7
230	leg injury	8 years	1	1		1	0	0	0	0	0	0	1	1	0	0	0	1	1	0	0	2	1	0	2	1	10	0	1	3	6
231	suicide of friend/family	1	3			1	1	0	0	3	4	1	2	0	1	0	0	1	1	1	2	2	3	2	2	1	27	8	3	4	12
232	Sexual violence	2-3 years	1	3		0	0	0	0	1	0	0	0	0	1	0	2	0	0	0	0	0	1	1	0	0	6	1	0	3	2
233	Arapahoe Shooting (school)	2 years	1	1,2		1	0	0	0	0	2	0	0	0	0	0	0	0	0	0	0	0	0	0	0	0	2	2	0	0	0
234	Sexual violence	3 years	1	3		0	1	0	0	0	0	1	1	0	0	0	1	0	0	0	0	0	0	0	0	0	4	1	2	1	0
235	Grandpa's Death	15 years	1	1		1	0	0	0	0	0	1	0	0	1	0	0	0	0	0	0	0	0	0	0	0	2	0	1	1	0
236	being followed	5 months	0	1		0	0	0	0	0	3	0	2	2	0	0	1	0	0	0	0	0	3	0	0	0	11	3	2	3	3
237	emotional and physical abuse	2-3 ….(?)	0	1		0	2	3	1	4	0	4	3	3	4	4	3	3	3	4	1	3	1	0	3	4	53	10	7	24	12
238	rape and kidnap (sister)	1 month	1	2		0	4	4	3	4	3	4	4	1	4	4	4	4	2	1	1	2	4	4	4	4	65	18	8	20	19
239	Sexual violence (rape)	3 years	1	1		0	1	1	1	3	3	2	1	0	0	1	1	1	0	0	1	0	2	2	1	1	22	9	3	3	7
240	father in coma	2 years	1	3		2	1	0	1	0	0	1	1	0	0	0	2	0	0	0	1	0	0	0	0	1	8	2	2	2	2
241	Attempted Suicide	2 Years	1	1,2		0	1	0	0	1	0	0	0	1	0	1	1	0	0	0	0	0	1	0	0	1	7	2	0	3	2
242	Emergency Chest Tube Surgery	1 year	1	1		0	2	1	3	1	2	2	1	2	1	0	2	3	0	0	0	0	1	0	0	1	22	9	3	8	2
243	sexual abuse	9 years	1	3		0	0	1	0	1	2	1	2	0	1	0	2	0	0	0	1	0	2	2	1	1	17	4	3	3	7
244	near death	15 years	1	1		0	0	0	0	0	0	0	0	0	0	0	0	0	0	0	0	0	0	0	0	0	0	0	0	0	0
245	friend's suicide	2 years	1	3		0	1	0	0	1	0	1	0	0	0	0	0	1	1	1	0	0	1	0	2	0	9	2	1	3	3
246	family friend suicide	3 years	1	3		1	0	0	0	1	0	0	0	1	0	0	1	0	0	0	0	0	1	0	1	2	7	1	0	2	4
247	rape multiple people/times	2 years	1	1		1	2	1	1	2	3	3	3	3	2	2	2	1	1	2	1	2	2	2	1	1	37	9	6	13	9
249	almost drowned	4th grade	1	1		0	0	0	0	0	0	2	2	0	0	0	0	0	0	0	0	0	1	0	0	0	5	0	4	0	1
250	suicide (squad leader)	1.5 years	1	2		1	0	0	0	0	0	0	0	0	0	0	0	0	0	0	0	0	0	0	0	0	0	0	0	0	0
251	Car Accident	1.5 months	0	1		0	0	0	0	0	1	1	0	3	0	1	1	0	1	0	1	0	3	2	1	0	15	1	1	6	7
252	rape (friend)	3-4 months	1	3		0	2	2	0	2	1	2	0	0	0	0	0	0	0	0	0	0	0	0	0	0	9	7	2	0	0
253	parents fighting	4 years	1	2		0	1	2	4	2	3	3	3	2	3	0	2	3	4	3	1	2	3	2	1	4	48	12	6	17	13
254	ex cheating	2 years	0	1		0	2	1	2	3	3	1	2	0	0	0	1	1	1	1	0	1	0	0	1	1	21	11	3	4	3
255	Car Accident	1 year	0	1		0	2	2	2	1	2	1	1	1	1	3	1	0	0	0	0	0	4	0	0	0	21	9	2	6	4
256	blank	4 years	0	1		0	0	0	0	0	0	0	0	0	0	0	0	0	0	0	0	0	0	0	0	0	0	0	0	0	0
257	suicide (friend)	3 years	1	3		1	4	4	4	4	4	1	1	1	4	4	4	4	4	4	4	4	1	1	4	4	65	20	2	25	18
258	bad grade	blank	0	1		0	1	1	1	3	0	1	1	0	1	3	1	0	0	0	0	1	2	1	2	0	19	6	2	5	6
260	school shooting	2 Years	1	1		0	2	0	0	1	0	0	0	1		0	1	0	0	0	0	0	2	2	0	2	11	3	0	2	6
261	friend dying	3.5 years	1	3		1	0	0	0	2	1	2	3	2	2	0	1	1	1	1	2	2	2	3	3	1	29	3	5	8	13
262	severe panic attack	2 years	1	1		2	1	2	2	2	2	3	1	3	3	1	2	1	3	3	4	1	1	1	3	4	43	9	4	16	14
263	broken bone	10 years	0	1		1	0	0	0	0	0	0	0	0	0	0	0	0	0	0	0	0	0	0	0	0	0	0	0	0	0
264	rape	13 years	1	1		0	0	0	0	0	0	0	0	1	0	0	1	0	0	0	0	0	0	0	0	0	2	0	0	2	0
265	got hit in face with baseball	11 years	1	1		0	0	0	0	0	0	1	0	0	0	0	1	0	0	0	1	0	1	0	0	0	4	0	1	1	2
266	mom got cancer	4 years	1	3		2	1	1	1	1	1	0	0	0	1	0	0	0	0	1	0	0	1	1	0	2	11	5	0	2	4
267	mountain climbing	1 month	1	1		0	1	0	1	0	1	2	1	0	0	0	0	4	1	2	1	0	0	0	0	0	14	3	3	7	1
268	Car Accident	1 year	0	1		0	0	0	0	0	0	1	0	1	0	1	1	0	0	0	0	0	1	0	0	0	5	0	1	3	1
269	dvt blood clot	3 days	1	1		0	2	1	2	3	4	2	2	0	0	2	4	3	0	1	0	0	3	0	1	2	32	12	4	10	6
270	homicide	8 years	1	3		1	0	0	0	1	0	1	0	0	0	0	0	0	0	0	0	0	0	0	0	0	2	1	1	0	0
271	house fire	4-5 years	1	1		0	0	0	0	0	0	1	0	0	0	0	0	0	0	0	0	0	1	1	0	0	3	0	1	0	2
272	a child's death	9 years	1	3		1	1	0	0	1	0	1	0	1	1	1	1	1	1	1	0	0	0	1	1	1	13	2	1	7	3
273	threatened to get jumped	3 years	1	4		0	0	0	0	0	0	0	0	0	0	0	0	0	0	0	0	0	0	0	0	0	0	0	0	0	0
274	abuse maybe	10-15 years	0	1		0	0	0	0	0	0	0	0	0	0	0	0	0	0	0	0	0	0	0	0	0	0	0	0	0	0
275	war	9 years	1	1,2,4		1	0	0	0	0	1	1	0	1	0	0	0	0	1	0	0	2	2	2	1	1	12	1	1	2	8
276	Childhood sexual assault	9 years	1	1		0	4	4	4	4	4	4	4	3	4	4	4	3	4	4	2	4	4	4	3	4	75	20	8	26	21
277	Sexually Molested	>10 years	1	1		0	0	0	0	0	0	3	0	3	3	4	3	2	2	1	0	1	3	3	4	4	36	0	3	18	15
278	Event not specified	12 years	0	1		1	2	0	0	0	1	1	0	0	0	0	1	0	0	0	0	0	0	0	1	0	6	3	1	1	1
279	Near head-on truck collison	4 Years	1	0	was in driver seat of car	0	0	0	0	0	1	1	0	1	1	2	1	0	0	0	0	0	0	0	0	0	7	1	1	5	0
280	Repetitive emotional abuse by alcoholic mother	started 15 years ago	0	1		0	3	2	3	4	3	4	3	4	4	1	3	2	3	1	3	2	3	3	3	3	57	15	7	18	17
281	Friend got into serious biking accident	4 months	1	3		0	1	0	0	1	0	0	0	0	1	0	1	0	2	1	0	0	0	0	0	0	7	2	0	5	0
282	Sexual assault	10 years ago	1	1		0	0	0	0	3	3	3	3	2	0	0	1	0	0	0	0	0	3	1	0	1	20	6	6	3	5
283	Suicide of friend	8 months	1	3		1	1	0	1	2	0	2	2	0	1	1	2	0	1	1	2	0	2	0	0	1	19	4	4	6	5
284	Child hit by truck	3 years	1	2		1	0	0	0	0	0	0	0	0	0	0	0	0	0	0	0	0	0	0	0	0	0	0	0	0	0
285	Sexual abuse of a friend	2 years	1	3		0	0	0	0	2	1	1	1	0	1	0	2	0	1	1	0	0	0	1	1	2	14	3	2	5	4
286	School shooting	2 years	1	2,5	also heard associated noises	1	3	3	1	2	4	4	4	1	3	0	3	1	1	0	2	1	4	4	4	2	47	13	8	9	17
287	attempted suicide	8 months	1	1		0	2	3	0	2	0	4	3	1	1	2	4	1	2	1	0	0	2	1	1	3	33	7	7	12	7
288	Tornado	9 years	1	2		0	1	0	1	0	1	2	0	0	0	0	0	0	0	0	0	0	0	0	0	2	7	3	2	0	2
289	My life was threatened	7 years	1	1		0	1	0	2	4	3	3	3	0	3	1	3	1	2	2	N/A	0	3	3	2	2	38	10	6	12	10
290	Mom's head got split open by a saw	6 years	1	5	Didn't see it happen but she was near by, called for help	1	0	0	0	0	0	0	0	0	1	0	0	0	0	0	0	0	0	0	0	0	1	0	0	1	0
291	Patrol went bad in Iraq	5 years	1	1,2,4		1	3	3	2	3	2	3	3	2	1	2	3	0	4	3	1	0	4	4	1	3	47	13	6	15	13
292	Sexual abuse	2 years	1	1		0	1	0	1	3	2	1	2	1	2	1	2	0	1	0	1	1	3	3	1	1	27	7	3	7	10
293	IED Blast, killed 2 of my soldiers & wounded me	9 years	1	1		1	3	0	0	4	1	1	3	0	4	4	4	1	2	2	4	0	3	2	4	0	42	8	4	17	13
294	Godmother dying	less than a year	1	3		2	1	2	1	1	1	2	1	2	1	1	2	1	1	0	0	0	1	1	1	3	23	6	3	8	6
295	Rape	4 years	1	1		0	0	0	0	1	1	1	0	0	0	0	1	0	0	0	1	0	1	0	0	0	6	2	1	1	2
296	Injury/threatned injury	4 years	1	1		0	0	0	0	0	0	0	0	0	0	0	0	0	0	0	0	0	1	1	0	0	2	0	0	0	2
297	A family member exposed themselves to me, asked me to touch them	12 years	1	1		0	0	0	0	1	0	1	0	0	0	2	4	0	0	0	0	0	0	0	0	0	8	1	1	6	0
298	Friend in car crash	3 years	0	3		1	1	1	0	1	1	3	3	1	3	1	2	0	1	1	2	2	1	2	1	0	27	4	6	9	8
299	Car accident	2 years	1	1		0	0	0	0	0	2	0	0	0	0	1	0	0	0	0	0	0	2	0	0	0	5	2	0	1	2
300	Watching my mom's daycare kid have a seziure	7 years ago	0	2		0	1	0	0	1	0	1	0	0	0	0	0	0	N/A	0	N/A	0	N/A	2	0	0	5	2	1	0	2
301	Sexual assault	2 years	1	1		0	2	2	3	3	3	4	4	4	3	3	3	1	2	3	3	3	3	3	3	3	58	13	8	19	18
302	Brother KIA in Afghanistan	3 years ago	1	3		1	1	0	1	3	3	4	2	3	1	3	3	1	0	0	0	0	1	3	1	1	31	8	6	11	6
303	Best friend was assaulted	1 year	1	3		0	0	0	2	0	0	0	0	0	0	0	2	0	0	0	0	0	0	0	0	1	5	2	0	2	1
304	Issues with subtexting knee caps (right and left)	6	1	1		1	1	0	0	0	2	3	3	2	0	0	0	2	0	0	0	0	1	0	0	0	14	3	6	4	1
305	My father committed suicide	12 years	1	3		1	1	3	0	3	1	2	2	4	4	2	2	0	1	1	0	1	0	0	0	2	29	8	4	14	3
306	Family relative sexually assaulted	less than a year	1	3,4		0	1	2	2	4	2	2	4	2	4	3	2	2	3	2	4	4	3	3	3	2	54	11	6	18	19
307	[Redacted by participant]	less than a year	0	1		0	3	2	3	3	2	3	4	2	3	3	3	3	2	2	2	2	2	2	3	3	52	13	7	18	14
308	Cousin got pregnant	2 years	0	3		0	0	0	0	0	0	1	0	0	0	0	0	0	0	0	0	0	0	0	0	0	1	0	1	0	0
309	My brother being hit	~2 years	0	2		0	2	0	4	4	2	4	1	3	4	4	4	1	3	3	4	4	3	1	0	3	54	12	5	22	15
310	Car Accident	1 year	1	1		1	0	0	2	2	2	0	0	0	0	0	1	0	0	0	0	0	3	1	0	0	11	6	0	1	4
311	Incestuous rape	2 years ago	1	3		0	3	1	0	3	0	2	3	0	3	2	2	2	3	1	0	0	0	0	0	4	29	7	5	13	4
312	Car crash	12 years ago	1	1		0	0	0	0	0	0	0	0	1	0	0	0	0	0	0	0	0	0	0	0	0	1	0	0	1	0
313	Sexual attack	15 years	1	1		0	0	0	0	1	1	0	0	0	0	0	1	0	0	0	0	0	4	2	0	0	9	2	0	1	6
314	Car accident killed brother and disabled (mentally & physically) mother	12 years	1	3		1	2	1	0	0	0	0	2	2	3	3	1	1	2	0	0	1	0	0	1	2	21	3	2	12	4
315	MISSING DATA																										0	0	0	0	0
316	My concussion	1.5 years	1	1		0	0	0	1	1	0	0	0	0	2	0	0	0	0	0	1	0	0	0	0	1	6	2	0	2	2
317	Family deaths	1 year & a week ago (2 deaths)	1	3,5	Found dead	1,2	4	4	4	4	4	4	4	0	3	4	4	2	4	4	4	1	2	3	3	2	64	20	8	21	15
318	Suicide	4 years	1	5	Happened to my mother	1	3	0	1	2	2	2	3	3	1	1	1	2	3	1	1	0	0	0	4	0	30	8	5	12	5
319	Mental abuse in elementry and high school by admin.	1-7 years	0	1		0	2	2	2	2	3	3	3	3	3	2	3	2	2	1	1	0	0	0	1	3	38	11	6	16	5
320	Mouth injury	8 years	0	1		0	0	0	0	1	1	0	0	0	0	1	1	3	0	0	0	0	0	0	0	0	7	2	0	5	0
321	rape - relationship violence	7 years	1	1		0	0	0	1	2	1	3	2	0	0	1	2	0	2	1	0	0	1	0	0	3	19	4	5	6	4
322	sexual abuse/harassment	8 months	1	1		0	3	0	3	2	1	3	3	1	0	1	2	1	0	2	0	0	2	0	1	3	28	9	6	7	6
324	Abusive relationship	3 years	0	1		0	0	0	0	0	0	0	0	0	1	0	1	1	1	1	1	0	1	0	1	1	9	0	0	5	4
325	Bullying	8 years	0	1		0	0	0	0	N/A	1	0	0	0	0	0	0	0	0	0	0	0	1	1	1	1	5	1	0	0	4
326	Sexual incidents	2 years ago (latest)	1	1		0	3	3	2	4	4	4	4	4	3	4	4	3	1	2	1	3	4	3	4	4	64	16	8	21	19
328	None disclosed	not disclosed	0	0		0	0	0	0	0	0	0	0	0	0	0	0	0	N/A	2	0	0	N/A	2	2	0	6	0	0	2	4
329	Alcohol poisoning	5 months ago	1	1		0	1	0	0	0	0	4	2	0	4	4	0	2	2	0	0	0	1	1	2	3	26	1	6	12	7
330	breaking my teeth out	6 years	1	1		0	0	1	0	0	0	0	0	1	0	0	0	0	0	0	0	0	0	0	0	0	2	1	0	1	0
331	parents divorce	current	0	1		0	1	0	0	2	2	3	3	0	3	2	3	2	2	3	2	2	1	0	2	0	33	5	6	15	7
332	Another man threatned with a knife	19 years ago	1	2		0	0	0	0	0	0	0	0	0	0	0	0	0	0	0	0	0	0	0	0	0	0	0	0	0	0
333	Car crash	3 years	1	1		0	2	1	0	3	2	2	2	1	0	0	1	0	0	0	0	0	2	1	2	0	19	8	4	2	5
334	Rather not mention	2 years	0	2		0	1	0	1	2	1	4	3	1	0	1	0	0	0	0	1	0	0	0	0	0	15	5	7	2	1
335	Sexual assult of a friend	4 years	1	3		0	1	0	0	1	0	2	1	0	0	0	0	0	0	0	0	0	0	0	0	0	5	2	3	0	0
336	Attempted suicide	1 year	1	1		0	2	0	1	3	2	4	4	2	1	0	3	0	1	2	1	0	2	2	3	2	35	8	8	9	10
337	rape	2 (months or years not specified)	1	1		0	3	2	0	4	4	4	4	0	3	4	4	3	4	3	0	0	4	4	4	4	58	13	8	21	16
338	Car crash	4 days	1	2		0	2	1	1	1	1	1	1	0	0	0	1	0	0	0	0	0	3	0	0	0	12	6	2	1	3
339	sexual violence	10 years	1	1		0	0	0	2	2	1	1	2	0	1	0	1	0	1	1	0	0	1	0	0	0	13	5	3	4	1
340	fire	13 years	1	1		0	1	1	0	0	0	0	1	0	0	1	0	0	1	1	0	0	0	0	1	1	8	2	1	3	2
341	friend dying in a car accident	6 months	1	3		1	2	2	2	4	3	2	2	1	0	0	2	0	0	1	2	2	2	2	3	3	35	13	4	4	14
342	I was in a school schooting	3 years ago	1	2		0	3	0	2	3	2	1	1	0	3	1	2	3	3	3	2	1	1	2	2	3	38	10	2	15	11
343	Car crash	2.5 years	1	1		0	3	1	3	3	2	2	2	1	1	0	2	1	3	1	2	1	2	1	2	2	35	12	4	9	10
344	Abuse	14 years	0	3		0	1	0	0	0	0	0	0	0	0	0	1	0	0	0	0	0	0	0	0	0	2	1	0	1	0
345	Sucker punched (broken jaw)	6.5 years	1	1		0	1	0	0	4	3	3	3	0	2	4	2	2	N/A	3	4	2	2	0	0	1	36	8	6	13	9
346	Friend's dad died in 9-11	15 years	1	3		1	0	0	0	2	0	1	0	0	0	0	0	0	0	0	0	0	0	0	1	1	5	2	1	0	2
347	Possible car crash	1 year	1	1		1,2	1	0	0	0	0	1	0	2	0	0	0	0	0	0	0	0	0	1	1	1	7	1	1	2	3
349	Brother passed away	12 years	1	3		1	0	0	1	1	1	1	0	0	0	0	1	1	2	0	0	0	1	0	0	1	10	3	1	4	2
350	Car Accident	4 years	1	3		1	0	0	0	1	0	1	0	0	0	0	0	0	0	0	0	0	0	1	1	0	4	1	1	0	2
351	Mother's Death	4 years	1	2		1	2	3	0	4	3	3	2	0	0	0	2	0	0	1	2	0	1	0	2	3	28	12	5	3	8
352	Kidnapping of my mum and death of my [INTELLIGIBLE] same day	3 years	1	3		1,2	0	0	0	1	1	3	3	1	3	0	1	0	0	0	0	1	3	3	0	0	20	2	6	5	7
353	Boyfriend overdosed on alcohol & other inidentifiable drug	1 year	1	3		0	1	0	0	2	0	1	0	0	1	1	0	0	0	0	0	2	0	0	0	0	8	3	1	2	2
354	Family dispute	10 months	0	1		0	1	0	0	1	0	0	0	0	0	0	0	0	0	0	0	0	0	0	0	0	2	2	0	0	0
355	Girlfriend was raped	1 year	1	3		0	1	0	0	2	3	4	4	0	0	2	0	0	0	0	0	0	0	0	0	0	16	6	8	2	0
356	Snake attack	16 years	1	1		0	1	0	0	0	0	1	1	0	0	0	0	1	0	0	0	0	1	0	0	0	5	1	2	1	1
357	Lost a young relative	5 years	1	2		1	1	0	0	2	0	1	0	0	3	1	0	1	2	0	1	0	4	3	2	1	22	3	1	7	11
358	My boyfriend having seizures several times a day	6-8 weeks ago	0	2		0	3	2	2	3	2	2	2	3	2	0	2	3	3	3	2	0	0	0	3	3	40	12	4	16	8
359	Being raped	6 months	1	1		0	4	3	2	2	3	4	4	1	2	2	3	4	3	4	2	1	2	2	1	4	53	14	8	19	12
360	100 round of golf	3 months	0	1		0	0	0	0	0	0	0	0	0	0	0	0	0	0	0	0	0	0	0	0	0	0	0	0	0	0
361	Sexual harrasment	2 years	1	1		0	2	2	2	3	4	4	4	3	2	3	4	0	3	3	3	1	N/A	4	4	4	55	13	8	18	16
363	Near drowning	2 years	1	1		0	0	1	0	0	1	0	0	2	0	0	0	1	1	1	1	2	0	1	2	1	14	2	0	5	7
364	Car accident	4 years ago	1	1		0	0	0	0	0	0	0	0	3	0	0	0	0	0	0	0	0	0	0	0	0	3	0	0	3	0
366	Near death experiences	1 week ago & few years ago	1	1,2		0	4	3	4	4	4	2	3	3	4	4	4	4	4	4	3	2	2	3	4	4	69	19	5	27	18
368	Brain Injury	6 months	1	1		0	1	0	2	3	2	3	3	0	1	2	2	2	3	2	2	0	3	2	3	4	40	8	6	12	14
369	Arm injury cut	2 years	1	1		0	0	0	0	0	0	0	0	0	0	0	0	0	0	0	0	0	0	0	0	0	0	0	0	0	0
370	Dad almost died	3 months	1	2		0	1	0	0	2	0	4	3	0	0	0	0	0	0	2	1	2	2	0	0	1	18	3	7	2	6
371	Car accident	6 months	1	2		0	0	0	0	0	0	0	0	1	0	0	0	0	0	0	0	0	0	0	0	0	1	0	0	1	0
372	Breaking my leg	16 years ago	1	1		0	1	0	0	1	1	0	0	0	0	0	1	1	2	2	2	0	2	0	2	3	18	3	0	6	9
373	Work as fire fighter/ EMT	Continuous for past 2 years	1	1,4		0	1	1	0	1	2	1	1	0	2	0	0	1	2	0	1	2	3	1	1	1	21	5	2	5	9
374	N/A	N/A	N/A	N/A																							0	0	0	0	0
375	Event not specified	3 months	1	3		2	1	0	0	2	0	0	0	0	0	0	1	0	1	0	0	1	0	0	1	2	9	3	0	2	4
376	Being raped	4 years ago	1	1		0	4	4	2	4	4	4	4	0	2	2	4	4	4	4	4	2	4	4	0	4	64	18	8	20	18
378	Event not specified	~ 6 months	0	1		0	1	0	0	4	0	1	0	1	3	4	3	0	0	0	0	0	0	0	0	0	17	5	1	11	0
379	Breaking arm	2 years	1	1		0	2	2	2	1	1	3	2	1	1	1	1	1	1	1	1	1	1	1	1	1	26	8	5	7	6
380	Death of a young loved one	10 years	1	3		1	0	0	0	1	3	1	1	1	0	0	0	1	1	0	0	2	0	0	1	0	12	4	2	3	3
381	My dog passing away	1.5 years	1	2		1	3	3	3	3	4	4	4	3	4	4	4	4	4	1	2	0	0	0	3	4	57	16	8	24	9

## Sheet: Groupings
	Groups
	Depression						Anxiety (Non PTSD)						PTSD						Users		CES-D ≥ 16	CONTROLS
Subject Number	Meds Only	Meds Casual	Meds Heavy	No Med	No Med Casual	No Meds Heavy	Meds Only	Meds Casual	Meds Heavy	No Med	No Med Casual	No Meds Heavy	Meds Only	Meds Casual	Meds Heavy	No Med	No Med Casual	No Meds Heavy	Casual	Heavy
116					1						1								1		1		4
118										1											1		2
119					1						1								1		1		4
121																						1	1
124																						1	1
125																					1	1	2
126																						1	1
130											1								1		1		3
131																						1	1
132	1						1														1		3
133				1						1													2
136																			1		1		2
137																						1	1
138																					1	1	2
139																				1	1		2
140				1																	1		2
141																						1	1
142																					1	1	2
143																					1	1	2
144																				1			1
145																		1		1	1		3
146																			1				1
147							1																1
148							1																1
149																						1	1
150												1								1			2
151																				1			1
152										1													1
153		1						1											1				3
155																				1			1
156																						1	1
157											1								1		1		3
158	1																				1		2
159																					1	1	2
161					1						1								1		1		4
162																		1		1	1		3
163						1						1								1	1		4
164																						1	1
165																						1	1
167																						1	1
168											1								1		1		3
169		1												1					1		1		4
170																					1	1	2
171					1						1								1		1		4
172					1						1								1		1		4
173				1																	1		2
174																						1	1
175																	1		1		1		3
176																1					1		2
177	1									1													2
178																			1				1
179				1																			1
180																						1	1
181				1						1													2
182		1										1							1				3
184																				1	1		2
185																					1	1	2
186																			1				1
187																				1	1		2
188																					1	1	2
189						1														1	1		3
190																				1
191																			1
192
194
195
196
197																				1
198																			1
199
200
201
202
203																				1
204
205																			1
206																			1
207
208
209																				1
209A																			1
210
211																				1
212																			1
213																				1
214
215
215A
216																			1
217																			1
218
219
220
221																			1
222																				1
223
224
225
226
227																				1
228
229
230																				1
231
232
233
234
235
236
237
238
239
240																				1
241
242																				1
243
244
245																				1
246
247																				1
249
250																				1
251																				1
252
253
254																				1
255
256
257
258
260
261																				1
262
263
264
265																				1
266
267																			1
268
269																				1
270																			1
271																			1
272																			1
273																				1
274
275
276
277
278
279																			1
280
281
282
283
284
285
286
287																			1
288
289																			1
290																				1
291
292
293																				1
294																			1
295																				1
296
297
298																			1
299
300
301																			1
302
303																			1
304																				1
305																			1
306																						1
307																			1
308																			1
309
310
311
312
313																			1
314																				1
315
316
317																			1
318
319
320
321
322
324
325
326
328
329
330
331
332
333
334
335
336
337
338
339
340
341
342
343
	3	3	0	5	5	2	3	1	0	5	8	3	0	1	0	1	1	2	41	36	32	22
	Depression						Anxiety (Non PTSD)						PTSD						Users		CES-D ≥ 16	CONTROLS
	Meds Only	Meds Casual	Meds Heavy	No Med	No Med Casual	No Meds Heavy	Meds Only	Meds Casual	Meds Heavy	No Med	No Med Casual	No Meds Heavy	Meds Only	Meds Casual	Meds Heavy	No Med	No Med Casual	No Meds Heavy	Casual	Heavy
Running Totals:
173
14
18
141

[truncated: 3 more sheets: Empathy Raw Entry, Reverse Score Empathy, Sheet1]
